# Supplementary material
Source: publisher figshare collection journal article supplement (https://springernature.figshare.com/ndownloader/files/23755537)
Supplement: Supplementary file 1 [file 23755537]

seq_id	Control_group_count	TPT_treatment_count	Control_group_fpkm	TPT_treatment_fpkm	log2FC(TPT_treatment/Control_group)	p-value	FDR	significant	regulate	NR_Description	Swissprot_Description	String_description	KEGG_GENE	Pfam
c94310_g1	77800.00	29.00	1479.207	0.331	-11.74	3.69e-12	1.52e-07	yes	down	putative membrane protein [Burkholderia sp. RPE67]	_	cell wall-associated hydrolase	_	_
c87535_g1	41151.00	25.00	1275.703	0.466	-11.14	2.18e-11	2.39e-07	yes	down	hypothetical protein [Collinsella aerofaciens]	_	_	_	_
c108923_g1	4091.00	0.00	329.516	0.000	-11.69	2.29e-11	2.39e-07	yes	down	hypothetical protein PUNSTDRAFT_78207, partial [Punctularia strigosozonata HHB-11173 hypothetical protein PUNSTDRAFT_78207, partial [	RecName: Full=Protein TAR1; AltName: Full=Transcript antisense to ribosomal RNA protein 1 [Saccharomyces cerevisiae S288c]	annotation not available	_	_
c116182_g1	4073.00	0.00	390.464	0.000	-11.93	2.33e-11	2.39e-07	yes	down	hypothetical protein TSTA_040370 [Talaromyces stipitatus ATCC 10500]	_	annotation not available	_	_
c106680_g1	23858.00	16.00	247.357	0.101	-10.27	4.35e-11	3.57e-07	yes	down	reverse transcriptase [Limulus polyphemus]	RecName: Full=Retrovirus-related Pol polyprotein from type-1 retrotransposable element R2; AltName: Full=Retrovirus-related Pol polyprotein from type I retrotransposa	_	_	PF00078.24|RVT_1|Reverse transcriptase (RNA-dependent DNA polymerase)|m.5251:669-926
c71474_g1	3133.00	0.00	200.046	0.000	-10.97	5.93e-11	4.07e-07	yes	down	PREDICTED: low-density lipoprotein receptor-related protein 2 [Acyrthosiphon pisum]	RecName: Full=Low-density lipoprotein receptor-related protein; Short=LRP; Flags: Precursor [Caenorhabditis elegans]	_	LRP2	PF00057.15|Ldl_recept_a|Low-density lipoprotein receptor domain class A|m.62163:45-80
c163608_g1	2924.00	0.00	124.766	0.000	-10.29	7.59e-11	4.46e-07	yes	down	PREDICTED: deleted in malignant brain tumors 1 protein-like [Strongylocentrotus purpuratus]	_	_	_	PF00530.15|SRCR|Scavenger receptor cysteine-rich domain|m.37358:121-196;PF00530.15|SRCR|Scavenger receptor cysteine-rich domain|m.37358:208-308;PF00530.15|SRCR|Scavenger receptor cysteine-rich domain|m.37358:320-395
c86065_g1	2493.00	0.00	169.242	0.000	-10.73	1.34e-10	6.88e-07	yes	down	PREDICTED: scavenger receptor cysteine-rich type 1 protein M130-like, partial [Amphimedon queenslandica]	RecName: Full=Neurotrypsin; AltName: Full=Serine protease 12; Flags: Precursor [Pan troglodytes]	_	_	PF00530.15|SRCR|Scavenger receptor cysteine-rich domain|m.30230:109-179;PF00530.15|SRCR|Scavenger receptor cysteine-rich domain|m.30230:196-231
c118881_g4	2012.00	0.00	89.173	0.000	-9.80	2.87e-10	1.31e-06	yes	down	_	_	_	_	_
c116011_g1	1824.00	0.00	117.239	0.000	-10.20	4.07e-10	1.68e-06	yes	down	hypothetical protein LOTGIDRAFT_163871 [Lottia gigantea]	_	_	_	_
c127441_g2	1742.00	0.00	176.598	0.000	-10.79	4.80e-10	1.79e-06	yes	down	hypothetical protein LOTGIDRAFT_104953, partial [Lottia gigantea]	RecName: Full=Neurotrypsin; AltName: Full=Serine protease 12; Flags: Precursor [Saguinus labiatus]	_	_	PF00530.15|SRCR|Scavenger receptor cysteine-rich domain|m.8200:34-134;PF00530.15|SRCR|Scavenger receptor cysteine-rich domain|m.8200:148-244
c113707_g1	1664.00	0.00	43.096	0.000	-8.75	5.65e-10	1.94e-06	yes	down	PREDICTED: von Willebrand factor D and EGF domain-containing protein-like [Saccoglossus kowalevskii]	_	_	_	_
c122978_g2	1561.00	0.00	68.266	0.000	-9.42	7.09e-10	2.24e-06	yes	down	PREDICTED: uncharacterized protein LOC102429693 [Myotis lucifugus]	_	_	_	PF04970.10|LRAT|Lecithin retinol acyltransferase|m.24376:29-145
c114392_g1	3519.00	5.00	147.823	0.182	-9.03	1.09e-09	3.19e-06	yes	down	_	_	_	_	PF01683.15|EB|EB module|m.53853:184-230
c86065_g2	1321.00	0.00	167.495	0.000	-10.71	1.28e-09	3.52e-06	yes	down	PREDICTED: deleted in malignant brain tumors 1 protein-like [Strongylocentrotus purpuratus]	RecName: Full=Deleted in malignant brain tumors 1 protein; AltName: Full=Glycoprotein 340; Short=Gp-340; AltName: Full=Hensin; AltName: Full=Salivary agglutinin; S	_	_	PF00530.15|SRCR|Scavenger receptor cysteine-rich domain|m.10159:1-61;PF00530.15|SRCR|Scavenger receptor cysteine-rich domain|m.10159:72-173
c165382_g1	1180.00	0.00	242.555	0.000	-11.24	1.92e-09	4.93e-06	yes	down	_	_	_	_	_
c90549_g1	1110.00	0.00	31.463	0.000	-8.30	2.39e-09	5.61e-06	yes	down	_	_	_	_	_
c104643_g1	1085.00	0.00	121.186	0.000	-10.24	2.59e-09	5.61e-06	yes	down	_	_	_	_	_
c93064_g2	1084.00	0.00	85.788	0.000	-9.75	2.59e-09	5.61e-06	yes	down	_	_	_	_	_
c128561_g2	1559.00	2.00	24.511	0.020	-7.68	3.25e-09	6.67e-06	yes	down	hypothetical protein BRAFLDRAFT_98619 [Branchiostoma floridae]	_	_	_	PF00094.22|VWD|von Willebrand factor type D domain|m.41942:406-564
c113707_g2	994.00	0.00	39.748	0.000	-8.64	3.53e-09	6.91e-06	yes	down	von Willebrand factor D and EGF domain-containing protein [Crassostrea gigas]	RecName: Full=Pancreatic secretory granule membrane major glycoprotein GP2; AltName: Full=Pancreatic zymogen granule membrane protein GP-2; Flags: Precursor	_	_	_
c70787_g1	965.00	0.00	68.303	0.000	-9.42	3.93e-09	7.35e-06	yes	down	_	_	_	_	_
c113610_g1	1403.00	2.00	23.191	0.020	-7.60	4.72e-09	8.17e-06	yes	down	PREDICTED: oncoprotein-induced transcript 3 protein-like [Saccoglossus kowalevskii]	_	_	_	PF00094.22|VWD|von Willebrand factor type D domain|m.67405:414-574
c185808_g1	914.00	0.00	55.217	0.000	-9.11	4.77e-09	8.17e-06	yes	down	PREDICTED: GTPase IMAP family member 7-like [Haplochromis burtoni]	_	_	_	PF04548.13|AIG1|AIG1 family|m.53917:10-216;PF01926.20|MMR_HSR1|50S ribosome-binding GTPase|m.53917:11-133
c114024_g2	868.00	0.00	105.668	0.000	-10.05	5.72e-09	9.41e-06	yes	down	_	_	_	_	PF07177.9|Neuralized|Neuralized|m.51820:6-72
c118644_g1	823.00	0.00	50.146	0.000	-8.97	6.91e-09	1.09e-05	yes	down	conserved hypothetical protein, partial [Parabacteroides sp. D13]	_	_	_	_
c85121_g1	1242.00	2.00	89.503	0.088	-8.90	7.28e-09	1.11e-05	yes	down	PREDICTED: P-selectin [Xenopus (Silurana) tropicalis]	RecName: Full=P-selectin; AltName: Full=CD62 antigen-like family member P; AltName: Full=CD62P antigen; AltName: Full=Granule membrane protein 140; Short=GMP-140; A	_	SELP	PF00084.17|Sushi|Sushi repeat (SCR repeat)|m.16059:130-189;PF00084.17|Sushi|Sushi repeat (SCR repeat)|m.16059:194-253
c97569_g1	1569.00	3.00	158.441	0.182	-9.13	8.82e-09	1.26e-05	yes	down	PREDICTED: LOW QUALITY PROTEIN: alpha-amylase 2B-like [Aplysia californica]	_	_	E3.2.1.1, amyA, malS	_
c110956_g2	766.00	0.00	33.748	0.000	-8.40	8.92e-09	1.26e-05	yes	down	hypothetical protein LOTGIDRAFT_162789 [Lottia gigantea]	_	_	_	PF04970.10|LRAT|Lecithin retinol acyltransferase|m.52706:12-136;PF00877.16|NLPC_P60|NlpC/P60 family|m.52706:7-51
c70752_g1	733.00	0.00	19.208	0.000	-7.59	1.04e-08	1.39e-05	yes	down	_	_	_	_	_
c112077_g4	725.00	0.00	44.110	0.000	-8.79	1.09e-08	1.39e-05	yes	down	_	_	_	_	_
c122595_g4	721.00	0.00	55.278	0.000	-9.11	1.11e-08	1.39e-05	yes	down	_	_	_	_	_
c105643_g1	719.00	0.00	264.879	0.000	-11.37	1.12e-08	1.39e-05	yes	down	plant senescence-associated protein, putative [Rhizoctonia solani AG-3 Rhs1AP]	RecName: Full=Putative uncharacterized protein ART2; AltName: Full=Antisense to ribosomal RNA transcript protein 2 [Saccharomyces cerevisiae S288c]	annotation not avaliable	_	_
c120128_g1	702.00	0.00	84.640	0.000	-9.73	1.22e-08	1.47e-05	yes	down	_	_	_	_	_
c123740_g1	682.00	0.00	20.650	0.000	-7.70	1.35e-08	1.58e-05	yes	down	_	_	_	_	_
c87603_g1	5541.00	22.00	1221.378	3.024	-8.61	1.90e-08	2.17e-05	yes	down	_	_	_	_	_
c118578_g4	614.00	0.00	25.183	0.000	-7.98	1.96e-08	2.17e-05	yes	down	_	_	_	_	PF07177.9|Neuralized|Neuralized|m.29619:146-212
c115598_g1	603.00	0.00	8.651	0.000	-6.45	2.09e-08	2.26e-05	yes	down	_	_	_	_	_
c123437_g1	589.00	0.00	43.951	0.000	-8.78	2.27e-08	2.34e-05	yes	down	_	_	_	_	_
c116182_g2	587.00	0.00	55.278	0.000	-9.11	2.30e-08	2.34e-05	yes	down	hypothetical protein BAUCODRAFT_127550 [Baudoinia compniacensis UAMH 10762]	_	_	_	_
c93729_g1	0.00	1071.00	0.000	30.912	8.28	2.33e-08	2.34e-05	yes	up	_	_	_	_	PF00069.22|Pkinase|Protein kinase domain|m.65131:177-299
c104625_g2	8.00	6717.00	0.220	108.053	8.40	2.64e-08	2.49e-05	yes	up	_	_	_	LGALS3	PF00337.19|Gal-bind_lectin|Galactoside-binding lectin|m.53100:11-124
c112536_g1	2551.00	10.00	73.520	0.176	-8.06	2.65e-08	2.49e-05	yes	down	hypothetical protein LOTGIDRAFT_228200 [Lottia gigantea]	_	_	_	PF13688.3|Reprolysin_5|Metallo-peptidase family M12|m.56233:200-391;PF01421.16|Reprolysin|Reprolysin (M12B) family zinc metalloprotease|m.56233:236-417;PF13582.3|Reprolysin_3|Metallo-peptidase family M12B Reprolysin-like|m.56233:237-369;PF13583.3|Reprolysin_4|Metallo-peptidase family M12B Reprolysin-like|m.56233:266-390
c117616_g1	563.00	0.00	21.456	0.000	-7.75	2.66e-08	2.49e-05	yes	down	_	_	_	_	PF00092.25|VWA|von Willebrand factor type A domain|m.73245:37-205;PF13519.3|VWA_2|von Willebrand factor type A domain|m.73245:37-147
c107093_g1	547.00	0.00	31.573	0.000	-8.31	2.95e-08	2.70e-05	yes	down	_	_	_	_	PF04970.10|LRAT|Lecithin retinol acyltransferase|m.78690:61-200
c152563_g1	541.00	0.00	15.151	0.000	-7.25	3.07e-08	2.74e-05	yes	down	_	_	_	_	PF04548.13|AIG1|AIG1 family|m.37718:18-241;PF01926.20|MMR_HSR1|50S ribosome-binding GTPase|m.37718:19-150
c116020_g6	538.00	0.00	56.145	0.000	-9.14	3.13e-08	2.74e-05	yes	down	_	_	_	_	_
c127465_g1	2110.00	9.00	101.062	0.223	-8.29	3.45e-08	2.90e-05	yes	down	_	_	_	_	_
c117968_g2	0.00	950.00	0.000	12.131	6.93	3.56e-08	2.90e-05	yes	up	_	_	_	_	_
c129215_g1	516.00	0.00	8.675	0.000	-6.46	3.63e-08	2.90e-05	yes	down	hypothetical protein LOTGIDRAFT_154256 [Lottia gigantea]	_	_	_	_
c163009_g1	789.00	1.00	37.206	0.027	-8.20	3.65e-08	2.90e-05	yes	down	_	_	_	_	_
c98164_g1	514.00	0.00	139.942	0.000	-10.45	3.67e-08	2.90e-05	yes	down	PREDICTED: very low-density lipoprotein receptor [Melopsittacus undulatus]	RecName: Full=Very low-density lipoprotein receptor; Short=VLDL receptor; Short=VLDL-R; AltName: Full=Vitellogenin receptor; Short=VTG receptor; Flags: Precursor	_	_	_
c107176_g2	508.00	0.00	24.584	0.000	-7.95	3.84e-08	2.98e-05	yes	down	PREDICTED: GTPase IMAP family member 4-like [Poecilia reticulata]	_	_	_	PF04548.13|AIG1|AIG1 family|m.53258:37-221;PF04548.13|AIG1|AIG1 family|m.53258:243-425;PF01926.20|MMR_HSR1|50S ribosome-binding GTPase|m.53258:36-131;PF01926.20|MMR_HSR1|50S ribosome-binding GTPase|m.53258:245-349
c124847_g1	500.00	0.00	10.618	0.000	-6.74	4.04e-08	3.08e-05	yes	down	_	_	_	_	PF13895.3|Ig_2|Immunoglobulin domain|m.41692:747-819
c115093_g2	0.00	870.00	0.000	17.998	7.50	4.85e-08	3.63e-05	yes	up	_	_	_	_	_
c105847_g1	455.00	0.00	9.457	0.000	-6.58	5.65e-08	4.15e-05	yes	down	unnamed protein product [Oncorhynchus mykiss]	_	_	CUBN	PF00431.17|CUB|CUB domain|m.56127:68-178;PF00431.17|CUB|CUB domain|m.56127:303-408;PF00431.17|CUB|CUB domain|m.56127:415-531;PF00431.17|CUB|CUB domain|m.56127:543-649;PF00431.17|CUB|CUB domain|m.56127:654-764;PF00431.17|CUB|CUB domain|m.56127:770-877
c111287_g1	441.00	0.00	30.180	0.000	-8.24	6.31e-08	4.55e-05	yes	down	_	_	_	_	_
c90400_g1	438.00	0.00	74.364	0.000	-9.54	6.46e-08	4.58e-05	yes	down	_	_	_	_	_
c128313_g1	877.00	3.00	14.223	0.034	-6.74	6.95e-08	4.82e-05	yes	down	_	_	_	_	PF00680.17|RdRP_1|RNA dependent RNA polymerase|m.64460:3-213
c110191_g7	428.00	0.00	9.580	0.000	-6.60	7.03e-08	4.82e-05	yes	down	_	_	_	_	_
c176286_g1	424.00	0.00	69.464	0.000	-9.44	7.25e-08	4.89e-05	yes	down	PREDICTED: cubilin-like [Aplysia californica]	_	_	PLG	PF00089.23|Trypsin|Trypsin|m.69957:2-103
c111429_g1	6658.00	41.00	217.653	0.803	-7.91	7.48e-08	4.96e-05	yes	down	hypothetical protein LOTGIDRAFT_167963 [Lottia gigantea]	RecName: Full=Hemicentin-1; AltName: Full=Fibulin-6; Short=FIBL-6; Flags: Precursor [Homo sapiens]	_	HMCN	PF00090.16|TSP_1|Thrombospondin type 1 domain|m.2150:123-174;PF00090.16|TSP_1|Thrombospondin type 1 domain|m.2150:188-237;PF00090.16|TSP_1|Thrombospondin type 1 domain|m.2150:251-300;PF00090.16|TSP_1|Thrombospondin type 1 domain|m.2150:317-363;PF00090.16|TSP_1|Thrombospondin type 1 domain|m.2150:378-426;PF00090.16|TSP_1|Thrombospondin type 1 domain|m.2150:433-490;PF01607.21|CBM_14|Chitin binding …
c99866_g3	12749.00	82.00	1644.857	6.474	-7.97	7.69e-08	5.02e-05	yes	down	_	_	_	_	_
c112192_g2	623.00	2.00	59.469	0.101	-8.21	8.44e-08	5.42e-05	yes	down	hydrolase [Capnocytophaga hypothetical protein CAPSP0001_0020 [Capnocytophaga sputigena ATCC 33612]	RecName: Full=Uncharacterized protein TC_0114	hypothetical protein	_	_
c8917_g1	1009.00	4.00	41.153	0.095	-7.72	9.21e-08	5.82e-05	yes	down	Putative sodium-coupled neutral amino acid transporter 11, partial [Crassostrea gigas]	_	_	_	PF00386.18|C1q|C1q domain|m.9753:77-186
c117377_g1	386.00	0.00	18.841	0.000	-7.57	1.01e-07	6.32e-05	yes	down	_	_	_	_	_
c124716_g1	0.00	702.00	0.000	23.607	7.89	1.04e-07	6.35e-05	yes	up	PREDICTED: uncharacterized protein LOC102309843 isoform X1 [Haplochromis burtoni]	_	_	_	PF04548.13|AIG1|AIG1 family|m.64710:1-127
c126910_g3	380.00	0.00	15.188	0.000	-7.26	1.07e-07	6.48e-05	yes	down	_	_	_	_	PF07686.14|V-set|Immunoglobulin V-set domain|m.11210:38-132
c96262_g1	0.00	675.00	0.000	9.654	6.61	1.19e-07	7.04e-05	yes	up	PREDICTED: centromere-associated protein E-like [Danio rerio]	RecName: Full=GTPase IMAP family member 4; AltName: Full=Immunity-associated nucleotide 1 protein; Short=IAN-1; Short=hIAN1; AltName: Full=Immunity-associated prot	_	_	PF04548.13|AIG1|AIG1 family|m.62389:9-211;PF01926.20|MMR_HSR1|50S ribosome-binding GTPase|m.62389:10-130
c123740_g3	368.00	0.00	36.522	0.000	-8.52	1.20e-07	7.04e-05	yes	down	_	_	_	_	_
c120279_g1	10289.00	75.00	379.125	1.654	-7.76	1.22e-07	7.07e-05	yes	down	PREDICTED: deleted in malignant brain tumors 1 protein-like [Strongylocentrotus purpuratus]	RecName: Full=Scavenger receptor cysteine-rich type 1 protein M130; AltName: CD_antigen=CD163; Contains: RecName: Full=Soluble CD163; Short=sCD163; Flags: Precurs	_	_	PF00530.15|SRCR|Scavenger receptor cysteine-rich domain|m.60050:109-157;PF00530.15|SRCR|Scavenger receptor cysteine-rich domain|m.60050:193-291;PF00530.15|SRCR|Scavenger receptor cysteine-rich domain|m.60050:303-403
c118261_g3	542.00	2.00	42.631	0.095	-7.78	1.38e-07	7.90e-05	yes	down	_	_	_	_	_
c122131_g2	0.00	639.00	0.000	7.736	6.29	1.45e-07	8.11e-05	yes	up	_	_	_	_	_
c117762_g2	348.00	0.00	24.670	0.000	-7.95	1.46e-07	8.11e-05	yes	down	_	_	_	_	_
c120627_g3	345.00	0.00	10.716	0.000	-6.76	1.50e-07	8.24e-05	yes	down	_	_	_	_	_
c88712_g2	344.00	0.00	36.901	0.000	-8.53	1.53e-07	8.26e-05	yes	down	_	_	_	_	_
c122117_g3	5548.00	44.00	252.049	1.256	-7.54	1.77e-07	9.32e-05	yes	down	_	_	_	_	PF01683.15|EB|EB module|m.364:47-90
c187640_g1	330.00	0.00	27.688	0.000	-8.12	1.77e-07	9.32e-05	yes	down	_	_	_	_	_
c116008_g2	327.00	0.00	39.479	0.000	-8.63	1.83e-07	9.50e-05	yes	down	hypothetical protein [Clostridium butyricum]	_	_	_	_
c72149_g1	313.00	0.00	23.741	0.000	-7.90	2.13e-07	1.10e-04	yes	down	_	_	_	_	_
c66660_g1	0.00	549.00	0.000	21.197	7.73	2.46e-07	1.25e-04	yes	up	_	_	_	_	_
c99529_g1	2373.00	20.00	510.061	2.680	-7.52	3.15e-07	1.58e-04	yes	down	_	_	_	_	_
c123110_g2	566.00	3.00	26.136	0.081	-7.18	3.27e-07	1.62e-04	yes	down	Endothelial cells scavenger receptor [Crassostrea gigas]	_	_	_	PF00754.22|F5_F8_type_C|F5/8 type C domain|m.56065:84-158
c128561_g1	422.00	1.00	8.944	0.014	-6.31	3.34e-07	1.62e-04	yes	down	PREDICTED: uncharacterized protein LOC101863175 [Aplysia californica]	RecName: Full=Uromodulin; AltName: Full=Tamm-Horsfall urinary glycoprotein; Short=THP; Contains: RecName: Full=Uromodulin, secreted form; Flags: Precursor [Homo sapie	_	_	PF00094.22|VWD|von Willebrand factor type D domain|m.31440:401-559;PF07974.10|EGF_2|EGF-like domain|m.31440:778-804
c124840_g3	275.00	0.00	3.629	0.000	-5.22	3.35e-07	1.62e-04	yes	down	_	_	_	_	_
c110358_g4	0.00	494.00	0.000	27.104	8.09	3.58e-07	1.71e-04	yes	up	_	_	_	_	_
c89792_g1	262.00	0.00	13.587	0.000	-7.10	3.99e-07	1.89e-04	yes	down	_	_	_	_	_
c85692_g1	247.00	0.00	390.977	0.000	-11.93	4.90e-07	2.29e-04	yes	down	_	_	_	_	_
c111122_g1	243.00	0.00	32.746	0.000	-8.36	5.22e-07	2.40e-04	yes	down	hypothetical protein LOTGIDRAFT_177452 [Lottia gigantea]	RecName: Full=Xaa-Pro aminopeptidase 1; AltName: Full=Aminoacylproline aminopeptidase; AltName: Full=Cytosolic aminopeptidase P; AltName: Full=Soluble aminopeptidas	_	pepP	PF16189.2|Creatinase_N_2|Creatinase/Prolidase N-terminal domain|m.58428:73-210
c127296_g3	495.00	3.00	34.652	0.128	-7.25	5.25e-07	2.40e-04	yes	down	unnamed protein product [Oncorhynchus mykiss]	_	_	_	_
c117483_g1	963.00	8.00	48.264	0.243	-7.14	5.54e-07	2.50e-04	yes	down	_	_	_	_	_
c89871_g1	235.00	0.00	21.163	0.000	-7.73	5.82e-07	2.60e-04	yes	down	_	_	_	_	_
c73719_g1	358.00	1.00	66.214	0.115	-8.27	5.98e-07	2.64e-04	yes	down	_	_	_	_	_
c143031_g1	231.00	0.00	33.492	0.000	-8.39	6.22e-07	2.72e-04	yes	down	_	_	_	_	_
c125943_g4	1.00	858.00	0.012	11.551	6.70	6.37e-07	2.76e-04	yes	up	_	_	_	_	PF07679.13|I-set|Immunoglobulin I-set domain|m.65462:741-815
c114407_g1	0.00	391.00	0.000	26.200	8.04	8.14e-07	3.49e-04	yes	up	_	_	_	_	_
c86947_g1	212.00	0.00	9.494	0.000	-6.58	8.45e-07	3.58e-04	yes	down	_	_	_	_	_
c97740_g1	20927.00	273.00	1191.662	9.350	-6.98	8.75e-07	3.67e-04	yes	down	hypothetical protein CGI_10017548 [Crassostrea gigas]	_	_	_	_
c98098_g1	526.00	4.00	46.236	0.216	-7.20	9.20e-07	3.81e-04	yes	down	_	_	_	_	_
c111420_g1	830.00	9.00	49.156	0.324	-6.86	9.35e-07	3.81e-04	yes	down	_	_	_	_	_
c105990_g2	205.00	0.00	29.973	0.000	-8.23	9.45e-07	3.81e-04	yes	down	hypothetical protein M091_0855 [Parabacteroides distasonis str. 3776 D15 i]	_	_	_	_
c127013_g2	314.00	2.00	9.201	0.034	-6.12	9.45e-07	3.81e-04	yes	down	PREDICTED: GTPase IMAP family member 8 [Danio rerio]	RecName: Full=GTPase IMAP family member 6; AltName: Full=Immunity-associated nucleotide 6 protein; Short=IAN-6; Short=mIAN6 [Mus musculus]	_	_	PF04548.13|AIG1|AIG1 family|m.57533:27-239;PF01926.20|MMR_HSR1|50S ribosome-binding GTPase|m.57533:28-151
c111361_g2	0.00	373.00	0.000	5.907	5.91	9.57e-07	3.82e-04	yes	up	_	_	_	_	PF00069.22|Pkinase|Protein kinase domain|m.54700:329-417;PF01163.19|RIO1|RIO1 family|m.54700:319-413
c106210_g1	2.00	940.00	0.305	88.563	7.77	1.01e-06	3.98e-04	yes	up	_	_	_	_	_
c114903_g5	0.00	365.00	0.000	3.544	5.19	1.03e-06	4.05e-04	yes	up	_	_	_	_	_
c113488_g2	198.00	0.00	9.592	0.000	-6.60	1.06e-06	4.11e-04	yes	down	_	_	_	_	_
c110090_g1	0.00	360.00	0.000	11.281	6.83	1.09e-06	4.18e-04	yes	up	_	_	_	_	_
c119602_g4	193.00	0.00	8.272	0.000	-6.39	1.16e-06	4.40e-04	yes	down	_	_	_	_	_
c105079_g1	13882.00	196.00	572.915	4.847	-6.86	1.17e-06	4.40e-04	yes	down	Ovochymase-1 [Crassostrea gigas]	_	_	PRSS7	PF00089.23|Trypsin|Trypsin|m.50510:203-426;PF00431.17|CUB|CUB domain|m.50510:35-146;PF00057.15|Ldl_recept_a|Low-density lipoprotein receptor domain class A|m.50510:155-189;PF09342.8|DUF1986|Domain of unknown function (DUF1986)|m.50510:213-313
c110570_g2	0.00	333.00	0.000	6.433	6.03	1.43e-06	5.35e-04	yes	up	_	_	_	_	_
c98515_g1	180.00	0.00	22.018	0.000	-7.79	1.49e-06	5.48e-04	yes	down	protein lethal, putative [Pediculus humanus corporis]	RecName: Full=Heat shock protein beta-1; Short=HspB1; AltName: Full=25 kDa IAP; AltName: Full=Actin polymerization inhibitor; AltName: Full=Heat shock 25 kDa protein	similar to heat shock protein 1	CRYAB	PF00011.18|HSP20|Hsp20/alpha crystallin family|m.2365:70-166
c123016_g2	0.00	329.00	0.000	3.099	5.00	1.49e-06	5.48e-04	yes	up	_	_	_	_	_
c111286_g1	271.00	1.00	10.410	0.020	-6.45	1.60e-06	5.81e-04	yes	down	_	_	_	_	_
c111361_g1	0.00	321.00	0.000	6.717	6.09	1.63e-06	5.88e-04	yes	up	_	_	_	_	_
c152525_g1	175.00	0.00	27.786	0.000	-8.12	1.65e-06	5.92e-04	yes	down	_	_	_	_	_
c129508_g1	7.00	1870.00	0.073	10.572	5.95	1.84e-06	6.52e-04	yes	up	_	_	_	_	_
c105340_g1	167.00	0.00	16.141	0.000	-7.34	1.93e-06	6.75e-04	yes	down	Niemann-Pick C1 protein [Crassostrea gigas]	_	_	FBLN1_2	PF07645.12|EGF_CA|Calcium-binding EGF domain|m.68471:33-76;PF07645.12|EGF_CA|Calcium-binding EGF domain|m.68471:78-115;PF07645.12|EGF_CA|Calcium-binding EGF domain|m.68471:117-157;PF12662.4|cEGF|Complement Clr-like EGF-like|m.68471:97-120
c108315_g2	0.00	304.00	0.000	7.480	6.24	1.96e-06	6.75e-04	yes	up	_	_	_	_	_
c96195_g1	166.00	0.00	12.023	0.000	-6.92	1.99e-06	6.75e-04	yes	down	_	_	_	_	_
c135413_g1	166.00	0.00	12.414	0.000	-6.97	1.99e-06	6.75e-04	yes	down	_	_	_	_	_
c113483_g1	0.00	303.00	0.000	4.726	5.59	1.99e-06	6.75e-04	yes	up	_	_	_	_	_
c70432_g1	164.00	0.00	19.452	0.000	-7.61	2.08e-06	7.01e-04	yes	down	_	_	_	_	_
c103723_g1	0.00	298.00	0.000	2.126	4.48	2.11e-06	7.07e-04	yes	up	hypothetical protein [Selenomonas ruminantium]	_	_	_	PF12773.4|DZR|Double zinc ribbon|m.29343:56-105
c102511_g1	249.00	2.00	18.096	0.088	-6.60	2.13e-06	7.07e-04	yes	down	unnamed protein product [Oikopleura dioica]	RecName: Full=Transmembrane protease serine 9; AltName: Full=Polyserase-I; AltName: Full=Polyserine protease 1; Short=Polyserase-1; Contains: RecName: Full=Serase-1;	_	TMPRSS9	_
c123607_g1	161.00	1.00	11.095	0.041	-6.31	2.22e-06	7.30e-04	yes	down	aspartic acid-rich protein [Natronomonas pharaonis]	_	_	_	_
c32310_g1	159.00	0.00	119.830	0.000	-10.23	2.29e-06	7.48e-04	yes	down	PREDICTED: LOW QUALITY PROTEIN: SCO-spondin [Poecilia formosa]	RecName: Full=Very low-density lipoprotein receptor; Short=VLDL receptor; Short=VLDL-R; AltName: Full=Vitellogenin receptor; Short=VTG receptor; Flags: Precursor	_	_	_
c103542_g1	243.00	1.00	17.180	0.041	-6.94	2.34e-06	7.59e-04	yes	down	Multimerin-1 [Crassostrea gigas]	_	_	_	PF00386.18|C1q|C1q domain|m.446:83-196
c108008_g2	156.00	0.00	8.309	0.000	-6.39	2.45e-06	7.86e-04	yes	down	_	_	_	_	_
c117522_g1	0.00	284.00	0.000	4.948	5.66	2.49e-06	7.93e-04	yes	up	hypothetical protein LOTGIDRAFT_117519, partial [Lottia gigantea]	_	_	PARP10_14_15	_
c85959_g1	155.00	0.00	368.861	0.000	-11.85	2.53e-06	8.00e-04	yes	down	_	_	_	_	_
c117565_g1	154.00	0.00	7.392	0.000	-6.23	2.57e-06	8.01e-04	yes	down	_	_	_	_	_
c31888_g1	154.00	0.00	20.748	0.000	-7.70	2.57e-06	8.01e-04	yes	down	_	_	_	_	_
c111335_g1	314.00	3.00	41.874	0.243	-6.94	2.60e-06	8.03e-04	yes	down	_	_	_	_	_
c129384_g2	6702.00	118.00	489.864	5.178	-6.54	2.66e-06	8.16e-04	yes	down	_	_	_	_	_
c91252_g1	24.00	4844.00	3.715	460.612	6.92	2.68e-06	8.16e-04	yes	up	_	_	_	_	_
c79838_g2	150.00	0.00	26.979	0.000	-8.08	2.80e-06	8.40e-04	yes	down	_	_	_	_	_
c117968_g3	0.00	274.00	0.000	8.790	6.47	2.80e-06	8.40e-04	yes	up	_	_	_	_	_
c77429_g1	8.00	1770.00	0.599	80.287	6.85	2.95e-06	8.77e-04	yes	up	PREDICTED: mucin-2-like [Heterocephalus glaber]	_	_	MUC2	_
c87261_g1	4150.00	75.00	242.201	2.633	-6.47	3.01e-06	8.91e-04	yes	down	Short-chain collagen C4 [Crassostrea gigas]	_	_	_	_
c165555_g1	0.00	268.00	0.000	16.681	7.39	3.05e-06	8.97e-04	yes	up	PREDICTED: neurogenic locus notch homolog protein 2-like [Microplitis demolitor]	_	_	_	_
c112979_g1	7688.00	142.00	531.469	8.722	-5.91	3.13e-06	9.13e-04	yes	down	_	_	_	_	_
c114942_g1	2.00	676.00	0.122	28.448	7.01	3.18e-06	9.21e-04	yes	up	_	_	_	_	_
c108371_g2	7071.00	133.00	2707.513	31.938	-6.40	3.31e-06	9.48e-04	yes	down	hypothetical protein [Clostridiales bacterium 1_7_47FAA]	RecName: Full=Keratin, type II cytoskeletal 3; AltName: Full=65 kDa cytokeratin; AltName: Full=Cytokeratin-3; Short=CK-3; AltName: Full=Keratin-3; Short=K3; AltNam	_	_	_
c90557_g1	0.00	261.00	0.000	19.165	7.59	3.34e-06	9.48e-04	yes	up	PREDICTED: latent-transforming growth factor beta-binding protein 2 [Anas platyrhynchos]	RecName: Full=Epidermal growth factor-like protein 7; Short=EGF-like protein 7; AltName: Full=Multiple epidermal growth factor-like domains protein 7; Short=Multip	_	LTBP2_3_4	_
c115086_g1	4169.00	77.00	292.677	3.240	-6.45	3.34e-06	9.48e-04	yes	down	scavenger receptor cysteine-rich protein precursor [Strongylocentrotus purpuratus]	RecName: Full=Deleted in malignant brain tumors 1 protein; AltName: Full=Glycoprotein 340; Short=Gp-340; AltName: Full=Hensin; AltName: Full=Salivary agglutinin; S	_	_	PF00530.15|SRCR|Scavenger receptor cysteine-rich domain|m.35077:90-186;PF00530.15|SRCR|Scavenger receptor cysteine-rich domain|m.35077:195-292
c100857_g1	218.00	2.00	15.371	0.088	-6.36	3.40e-06	9.56e-04	yes	down	putative fibrillin 2 [Danaus plexippus]	_	_	FBLN1_2	PF07645.12|EGF_CA|Calcium-binding EGF domain|m.64646:1-25;PF07645.12|EGF_CA|Calcium-binding EGF domain|m.64646:27-57;PF14670.3|FXa_inhibition|Coagulation Factor Xa inhibitory site|m.64646:31-66
c111574_g1	140.00	0.00	7.796	0.000	-6.30	3.59e-06	9.90e-04	yes	down	_	_	_	_	_
c120795_g2	0.00	255.00	0.000	5.873	5.90	3.59e-06	9.90e-04	yes	up	_	_	_	_	_
c113633_g3	0.00	255.00	0.000	12.739	7.00	3.59e-06	9.90e-04	yes	up	_	_	_	_	_
c111335_g2	141554.00	2795.00	6183.307	73.192	-6.40	3.65e-06	9.99e-04	yes	down	Ovochymase-1 [Crassostrea gigas]	_	_	_	PF00089.23|Trypsin|Trypsin|m.55996:77-305;PF00057.15|Ldl_recept_a|Low-density lipoprotein receptor domain class A|m.55996:22-53;PF09342.8|DUF1986|Domain of unknown function (DUF1986)|m.55996:88-192
c122069_g1	1.00	521.00	0.012	4.739	5.43	3.67e-06	9.99e-04	yes	up	hypothetical protein LOTGIDRAFT_238308 [Lottia gigantea]	RecName: Full=Megakaryocyte-associated tyrosine-protein kinase; AltName: Full=CSK homologous kinase; Short=CHK; AltName: Full=Hematopoietic consensus tyrosine-lackin	_	CSK	PF07714.14|Pkinase_Tyr|Protein tyrosine kinase|m.272:866-1120;PF00069.22|Pkinase|Protein kinase domain|m.272:868-1118
c119786_g1	213.00	2.00	7.832	0.047	-5.75	3.69e-06	9.99e-04	yes	down	hypothetical protein CHLNCDRAFT_137487 [Chlorella variabilis]	_	_	_	_
c123716_g2	22092.00	436.00	889.662	10.518	-6.39	3.74e-06	1.00e-03	yes	down	_	_	_	_	_
c104781_g3	138.00	0.00	12.280	0.000	-6.95	3.80e-06	1.01e-03	yes	down	_	_	_	_	_
c129384_g1	30273.00	614.00	554.758	6.704	-6.35	4.07e-06	1.08e-03	yes	down	hypothetical protein LOTGIDRAFT_236770 [Lottia gigantea]	_	_	_	PF01421.16|Reprolysin|Reprolysin (M12B) family zinc metalloprotease|m.13520:233-411;PF13582.3|Reprolysin_3|Metallo-peptidase family M12B Reprolysin-like|m.13520:237-359;PF13688.3|Reprolysin_5|Metallo-peptidase family M12|m.13520:240-365
c81802_g1	0.00	243.00	0.000	4.381	5.49	4.25e-06	1.12e-03	yes	up	PREDICTED: uncharacterized protein LOC580404 [Strongylocentrotus purpuratus]	_	_	_	_
c111295_g1	399.00	6.00	44.574	0.405	-6.47	4.55e-06	1.19e-03	yes	down	_	_	_	_	_
c97726_g1	1358.00	26.00	264.439	3.146	-6.35	4.68e-06	1.20e-03	yes	down	_	_	_	_	_
c101406_g1	130.00	0.00	15.102	0.000	-7.25	4.69e-06	1.20e-03	yes	down	_	_	_	_	_
c101586_g2	130.00	0.00	5.523	0.000	-5.81	4.69e-06	1.20e-03	yes	down	serine protease inhibitor protein [Haliotis discus discus]	_	_	SERPINB	PF00079.17|Serpin|Serpin (serine protease inhibitor)|m.55903:1-336
c82187_g1	0.00	237.00	0.000	14.143	7.15	4.69e-06	1.20e-03	yes	up	_	_	_	_	_
c86410_g1	129.00	0.00	12.011	0.000	-6.92	4.78e-06	1.21e-03	yes	down	_	_	_	_	_
c98806_g1	0.00	232.00	0.000	29.042	8.19	4.98e-06	1.26e-03	yes	up	_	_	_	_	_
c107997_g1	1770.00	35.00	185.090	2.228	-6.31	5.02e-06	1.26e-03	yes	down	_	_	_	_	_
c104299_g1	193.00	1.00	21.933	0.068	-7.04	5.20e-06	1.30e-03	yes	down	G-type lysozyme [Physella acuta]	RecName: Full=Lysozyme g; AltName: Full=1,4-beta-N-acetylmuramidase; AltName: Full=Goose-type lysozyme; Flags: Precursor	_	_	_
c91806_g1	0.00	226.00	0.000	4.813	5.62	5.52e-06	1.36e-03	yes	up	_	_	_	_	_
c127228_g3	0.00	226.00	0.000	3.861	5.31	5.52e-06	1.36e-03	yes	up	_	_	_	_	_
c85798_g1	123.00	0.00	10.496	0.000	-6.73	5.63e-06	1.37e-03	yes	down	_	_	_	_	_
c153380_g1	189.00	1.00	26.649	0.088	-7.15	5.64e-06	1.37e-03	yes	down	hypothetical protein T265_00005 [Opisthorchis viverrini]	RecName: Full=Cold shock domain-containing protein 3; Short=AtCSP3 [Arabidopsis thaliana]	_	SUPT6H, SPT6	PF00098.20|zf-CCHC|Zinc knuckle|m.33889:4-19;PF00098.20|zf-CCHC|Zinc knuckle|m.33889:48-62;PF00098.20|zf-CCHC|Zinc knuckle|m.33889:75-91;PF00098.20|zf-CCHC|Zinc knuckle|m.33889:109-126;PF00098.20|zf-CCHC|Zinc knuckle|m.33889:135-151;PF14392.3|zf-CCHC_4|Zinc knuckle|m.33889:3-19;PF14392.3|zf-CCHC_4|Zinc knuckle|m.33889:47-62;PF14392.3|zf-CCHC_4|Zinc knuckle|m.33889:75-90;PF14392.3|zf-CCHC_4|Zinc k…
c108575_g1	23202.00	517.00	1288.875	17.295	-6.21	5.66e-06	1.37e-03	yes	down	_	_	_	_	PF06607.8|Prokineticin|Prokineticin|m.1919:4-92
c102672_g1	188.00	1.00	13.661	0.041	-6.61	5.72e-06	1.37e-03	yes	down	hypothetical protein YQE_04995, partial [Dendroctonus ponderosae]	RecName: Full=Cathepsin B; Contains: RecName: Full=Cathepsin B light chain; Contains: RecName: Full=Cathepsin B heavy chain; Flags: Precursor [Sus scrofa]	_	CTSB	_
c119262_g1	1221.00	25.00	81.279	1.006	-6.20	5.74e-06	1.37e-03	yes	down	_	_	_	_	PF02822.11|Antistasin|Antistasin family|m.44518:29-54
c23953_g1	0.00	223.00	0.000	11.382	6.84	5.75e-06	1.37e-03	yes	up	_	_	_	_	_
c94660_g1	309.00	5.00	22.116	0.216	-6.14	5.95e-06	1.40e-03	yes	down	hypothetical protein LOTGIDRAFT_169531 [Lottia gigantea]	_	_	_	_
c126086_g1	0.00	220.00	0.000	7.075	6.16	6.00e-06	1.41e-03	yes	up	_	_	_	_	_
c106475_g1	2787.00	61.00	481.054	6.508	-6.19	6.20e-06	1.45e-03	yes	down	haemagglutinin [Azospirillum putative exported haemagglutinin-like protein [Azospirillum lipoferum 4B]	RecName: Full=Histone-lysine N-methyltransferase SETD1B; AltName: Full=Lysine N-methyltransferase 2G; AltName: Full=SET domain-containing protein 1B; Short=hSET1B	_	_	_
c120249_g1	2.00	554.00	0.073	14.379	6.39	6.41e-06	1.49e-03	yes	up	_	_	_	_	_
c109456_g1	9977.00	230.00	1017.446	14.258	-6.15	6.60e-06	1.52e-03	yes	down	_	_	_	_	_
c120292_g1	117.00	0.00	2.554	0.000	-4.73	6.68e-06	1.53e-03	yes	down	_	_	_	_	_
c112583_g1	0.00	213.00	0.000	4.867	5.63	6.68e-06	1.53e-03	yes	up	_	_	_	_	PF02886.14|LBP_BPI_CETP_C|LBP / BPI / CETP family, C-terminal domain|m.33141:242-481;PF01273.22|LBP_BPI_CETP|LBP / BPI / CETP family, N-terminal domain|m.33141:43-202
c130784_g1	1271.00	27.00	11.913	0.149	-5.59	6.93e-06	1.57e-03	yes	down	PREDICTED: sushi, von Willebrand factor type A, EGF and pentraxin domain-containing protein 1-like [Aplysia californica]	RecName: Full=Coadhesin, partial [Acropora millepora]	_	HMCN	PF02494.13|HYR|HYR domain|m.6622:118-198;PF02494.13|HYR|HYR domain|m.6622:317-398;PF02494.13|HYR|HYR domain|m.6622:517-598;PF00090.16|TSP_1|Thrombospondin type 1 domain|m.6622:1280-1330;PF00090.16|TSP_1|Thrombospondin type 1 domain|m.6622:1337-1387;PF00090.16|TSP_1|Thrombospondin type 1 domain|m.6622:1395-1444;PF07699.10|Ephrin_rec_like|Putative ephrin-receptor like|m.6622:912-959;PF07699.10|Ephr…
c101306_g1	116.00	0.00	5.547	0.000	-5.82	6.98e-06	1.57e-03	yes	down	hypothetical protein T265_08625 [Opisthorchis viverrini]	RecName: Full=Leukocyte elastase inhibitor; AltName: Full=Serpin B1 [Xenopus laevis]	_	SERPINB	PF00079.17|Serpin|Serpin (serine protease inhibitor)|m.2042:7-380
c123945_g2	116.00	1.00	4.411	0.020	-5.23	6.98e-06	1.57e-03	yes	down	_	_	_	_	_
c121146_g1	0.00	209.00	0.000	1.883	4.31	7.14e-06	1.60e-03	yes	up	_	_	_	_	_
c98503_g1	0.00	208.00	0.000	3.720	5.26	7.30e-06	1.62e-03	yes	up	_	_	_	_	_
c103822_g1	857.00	18.00	102.846	1.316	-6.18	7.33e-06	1.62e-03	yes	down	_	_	_	_	_
c98668_g1	113.00	0.00	14.296	0.000	-7.17	7.64e-06	1.68e-03	yes	down	hypothetical protein BRAFLDRAFT_67516 [Branchiostoma floridae]	RecName: Full=Tenascin-N; Short=TN-N; Flags: Precursor [Mus musculus]	_	ANGPT2	PF00147.15|Fibrinogen_C|Fibrinogen beta and gamma chains, C-terminal globular domain|m.26639:1-143
c104749_g1	111.00	0.00	12.866	0.000	-7.02	8.00e-06	1.75e-03	yes	down	protein lethal, putative [Pediculus humanus corporis]	_	_	CRYAB	PF00011.18|HSP20|Hsp20/alpha crystallin family|m.55315:47-138
c90932_g1	670.00	14.00	17.864	0.223	-5.80	8.02e-06	1.75e-03	yes	down	_	_	_	_	PF00452.16|Bcl-2|Apoptosis regulator proteins, Bcl-2 family|m.75846:77-172
c106645_g2	18945.00	470.00	3491.776	53.669	-6.02	8.30e-06	1.79e-03	yes	down	_	_	_	_	_
c93852_g1	110.00	0.00	21.798	0.000	-7.77	8.38e-06	1.79e-03	yes	down	PREDICTED: uncharacterized protein LOC560278, partial [Danio rerio]	_	_	_	PF04548.13|AIG1|AIG1 family|m.7368:1-64;PF04548.13|AIG1|AIG1 family|m.7368:105-246;PF01926.20|MMR_HSR1|50S ribosome-binding GTPase|m.7368:105-221
c66305_g4	110.00	0.00	29.789	0.000	-8.22	8.38e-06	1.79e-03	yes	down	_	_	_	_	_
c99967_g2	0.00	199.00	0.000	6.217	5.98	8.58e-06	1.82e-03	yes	up	echotoxin A [Monoplex echo]	RecName: Full=Echotoxin-2; Short=Echt 2; Flags: Precursor [Monoplex echo]	_	_	_
c115935_g1	0.00	198.00	0.000	6.933	6.14	8.58e-06	1.82e-03	yes	up	_	_	_	_	_
c122600_g2	108.00	0.00	6.476	0.000	-6.04	8.78e-06	1.85e-03	yes	down	_	_	_	_	PF07686.14|V-set|Immunoglobulin V-set domain|m.11422:34-127
c125576_g1	973.00	22.00	15.701	0.209	-5.68	8.82e-06	1.85e-03	yes	down	PREDICTED: uncharacterized protein LOC101863175 [Aplysia californica]	RecName: Full=Oncoprotein-induced transcript 3 protein; Flags: Precursor	_	_	PF00094.22|VWD|von Willebrand factor type D domain|m.19463:416-577;PF07974.10|EGF_2|EGF-like domain|m.19463:795-820
c114903_g2	0.00	196.00	0.000	7.345	6.22	8.99e-06	1.88e-03	yes	up	_	_	_	_	_
c127770_g2	2.00	500.00	0.037	5.765	5.42	9.09e-06	1.88e-03	yes	up	_	_	_	_	_
c123819_g4	107.00	0.00	14.162	0.000	-7.16	9.21e-06	1.88e-03	yes	down	_	_	_	_	_
c127441_g4	107.00	0.00	7.942	0.000	-6.33	9.21e-06	1.88e-03	yes	down	_	_	_	_	_
c98712_g1	0.00	195.00	0.000	3.369	5.12	9.21e-06	1.88e-03	yes	up	_	_	_	_	PF08378.8|NERD|Nuclease-related domain|m.58577:36-110
c95531_g1	106.00	0.00	7.111	0.000	-6.17	9.43e-06	1.91e-03	yes	down	Kynurenine formamidase [Crassostrea gigas]	_	_	_	PF04199.10|Cyclase|Putative cyclase|m.62567:31-202
c108465_g1	0.00	193.00	0.000	5.461	5.80	9.43e-06	1.91e-03	yes	up	_	_	_	_	_
c102118_g1	4847.00	123.00	351.241	5.380	-6.00	9.64e-06	1.92e-03	yes	down	_	_	_	_	_
c94350_g2	0.00	192.00	0.000	4.050	5.38	9.66e-06	1.92e-03	yes	up	_	_	_	_	_
c114284_g4	2194.00	55.00	1395.386	20.502	-6.08	9.68e-06	1.92e-03	yes	down	PREDICTED: deleted in malignant brain tumors 1 protein-like [Latimeria chalumnae]	RecName: Full=Deleted in malignant brain tumors 1 protein; AltName: Full=Hensin; Flags: Precursor [Oryctolagus cuniculus]	_	DMBT1	PF00530.15|SRCR|Scavenger receptor cysteine-rich domain|m.7684:27-125
c114057_g1	1311.00	32.00	37.658	0.547	-5.87	9.68e-06	1.92e-03	yes	down	PREDICTED: peroxidasin-like [Aplysia californica]	RecName: Full=Peroxidase-like protein 2	_	_	PF03098.12|An_peroxidase|Animal haem peroxidase|m.26331:97-624
c122986_g1	2301.00	59.00	112.523	1.735	-5.94	1.04e-05	2.06e-03	yes	down	PREDICTED: uncharacterized protein LOC100939189, partial [Pongo abelii]	_	_	_	_
c168566_g1	102.00	0.00	12.598	0.000	-6.99	1.07e-05	2.10e-03	yes	down	_	_	_	_	_
c98950_g1	0.00	185.00	0.000	4.969	5.66	1.09e-05	2.14e-03	yes	up	_	_	_	_	_
c154770_g1	101.00	0.00	9.971	0.000	-6.65	1.12e-05	2.16e-03	yes	down	_	_	_	_	_
c93921_g1	0.00	184.00	0.000	4.044	5.37	1.12e-05	2.16e-03	yes	up	_	_	_	_	_
c102133_g2	0.00	183.00	0.000	3.551	5.19	1.12e-05	2.16e-03	yes	up	_	_	_	_	_
c119160_g2	100.00	0.00	6.830	0.000	-6.11	1.15e-05	2.21e-03	yes	down	_	_	_	_	_
c99153_g1	0.00	181.00	0.000	6.481	6.04	1.18e-05	2.26e-03	yes	up	_	_	_	_	_
c103767_g1	0.00	179.00	0.000	6.123	5.96	1.21e-05	2.30e-03	yes	up	_	_	_	_	_
c108413_g1	930.00	24.00	86.069	1.337	-5.91	1.24e-05	2.34e-03	yes	down	conserved hypothetical protein [Ricinus communis]	RecName: Full=Splicing factor 3B subunit 4; AltName: Full=Spliceosome-associated protein 49 [Caenorhabditis elegans]	_	FMN2	_
c106237_g4	98.00	0.00	37.365	0.000	-8.55	1.24e-05	2.34e-03	yes	down	putative uncharacterized protein [Azospirillum sp. CAG:260]	_	hypothetical protein	_	_
c117309_g3	0.00	175.00	0.000	4.280	5.45	1.31e-05	2.46e-03	yes	up	_	_	_	_	_
c110921_g1	96.00	0.00	6.183	0.000	-5.97	1.35e-05	2.49e-03	yes	down	_	_	_	_	_
c124958_g1	0.00	174.00	0.000	2.457	4.68	1.35e-05	2.49e-03	yes	up	_	_	_	_	_
c103767_g2	0.00	174.00	0.000	3.531	5.18	1.35e-05	2.49e-03	yes	up	_	_	_	_	_
c101620_g1	95.00	0.00	4.497	0.000	-5.52	1.38e-05	2.55e-03	yes	down	_	_	_	_	PF07686.14|V-set|Immunoglobulin V-set domain|m.41557:137-230
c95555_g1	94.00	0.00	4.582	0.000	-5.55	1.42e-05	2.57e-03	yes	down	Alpha tubulin,putative [Oxytricha trifallax]	RecName: Full=Tubulin alpha chain	Tubulin alpha chain; Tubulin is the major constituent of microtubules. It binds two moles of [...]	TUBA	_
c123740_g2	94.00	0.00	2.041	0.000	-4.42	1.42e-05	2.57e-03	yes	down	_	_	_	_	_
c111838_g1	0.00	171.00	0.000	7.068	6.16	1.42e-05	2.57e-03	yes	up	_	_	_	_	_
c119657_g1	94.00	1.00	4.826	0.014	-5.43	1.42e-05	2.57e-03	yes	down	PREDICTED: lactose-binding lectin l-2-like, partial [Astyanax mexicanus]	_	_	PKD1L2	PF00059.18|Lectin_C|Lectin C-type domain|m.34312:75-179
c99967_g1	10.00	1376.00	0.562	46.499	6.14	1.45e-05	2.62e-03	yes	up	echotoxin A [Monoplex echo]	_	_	_	PF06369.9|Anemone_cytotox|Sea anemone cytotoxic protein|m.54741:35-168
c111752_g1	93.00	0.00	3.849	0.000	-5.30	1.50e-05	2.69e-03	yes	down	retinal dehydrogenase 1 [Clonorchis sinensis]	RecName: Full=Aldehyde dehydrogenase family 1 member A3; AltName: Full=Aldehyde dehydrogenase 6; AltName: Full=Retinaldehyde dehydrogenase 3; Short=RALDH-3; Short=	aldehyde dehydrogenase	E1.2.1.3	PF00171.19|Aldedh|Aldehyde dehydrogenase family|m.49384:20-480
c114903_g1	0.00	166.00	0.000	8.823	6.48	1.58e-05	2.82e-03	yes	up	_	_	_	_	_
c105579_g1	596.00	15.00	17.852	0.270	-5.60	1.58e-05	2.82e-03	yes	down	hypothetical protein LOTGIDRAFT_66705, partial [Lottia gigantea]	RecName: Full=Transmembrane protease serine 9; AltName: Full=Polyserase-I; AltName: Full=Polyserine protease 1; Short=Polyserase-1; Contains: RecName: Full=Serase-	_	PRSS	PF00089.23|Trypsin|Trypsin|m.6212:104-336
c114900_g3	0.00	164.00	0.000	7.561	6.26	1.63e-05	2.89e-03	yes	up	_	_	_	_	_
c123819_g1	90.00	0.00	7.014	0.000	-6.15	1.68e-05	2.89e-03	yes	down	_	_	_	_	_
c86417_g1	90.00	0.00	9.518	0.000	-6.59	1.68e-05	2.89e-03	yes	down	_	_	_	_	_
c110247_g1	0.00	163.00	0.000	6.764	6.10	1.68e-05	2.89e-03	yes	up	_	_	_	_	_
c127296_g1	138.00	2.00	11.987	0.108	-5.86	1.68e-05	2.89e-03	yes	down	predicted protein [Lodderomyces elongisporus NRRL YB-4239]	RecName: Full=Integumentary mucin C.1; AltName: Full=FIM-C.1	_	_	_
c120447_g1	138.00	2.00	4.118	0.034	-4.98	1.68e-05	2.89e-03	yes	down	_	_	_	_	_
c110276_g1	12.00	1561.00	0.220	16.600	5.71	1.69e-05	2.89e-03	yes	up	_	_	_	_	_
c111846_g1	1513.00	44.00	92.264	1.613	-5.75	1.70e-05	2.89e-03	yes	down	hypothetical protein LOTGIDRAFT_235672 [Lottia gigantea]	_	_	HMCN	PF00090.16|TSP_1|Thrombospondin type 1 domain|m.53401:86-134;PF00090.16|TSP_1|Thrombospondin type 1 domain|m.53401:145-198;PF01607.21|CBM_14|Chitin binding Peritrophin-A domain|m.53401:202-247
c100433_g1	89.00	0.00	3.898	0.000	-5.32	1.72e-05	2.89e-03	yes	down	_	_	_	_	_
c110670_g2	89.00	0.00	3.568	0.000	-5.20	1.72e-05	2.89e-03	yes	down	_	_	_	_	_
c98857_g1	0.00	162.00	0.000	5.218	5.73	1.72e-05	2.89e-03	yes	up	_	_	_	_	_
c127164_g5	0.00	162.00	0.000	3.429	5.14	1.72e-05	2.89e-03	yes	up	_	_	_	_	_
c88644_g1	89.00	1.00	9.005	0.061	-5.82	1.72e-05	2.89e-03	yes	down	_	_	_	_	_
c110191_g4	89.00	1.00	5.792	0.041	-5.38	1.72e-05	2.89e-03	yes	down	_	_	_	_	_
c124136_g5	88.00	0.00	13.013	0.000	-7.03	1.77e-05	2.94e-03	yes	down	_	_	_	_	_
c102987_g1	0.00	161.00	0.000	5.185	5.72	1.77e-05	2.94e-03	yes	up	L-asparaginase [Capronia coronata CBS 617.96]	_	_	ASPG	PF00710.17|Asparaginase|Asparaginase, N-terminal|m.55617:1-45
c95000_g2	0.00	161.00	0.000	2.943	4.93	1.77e-05	2.94e-03	yes	up	_	_	_	_	_
c124399_g2	3.00	487.00	0.281	27.752	6.19	1.86e-05	3.08e-03	yes	up	_	_	_	_	_
c71353_g1	87.00	1.00	6.586	0.047	-5.51	1.88e-05	3.09e-03	yes	down	_	_	_	_	_
c126877_g2	0.00	157.00	0.000	2.754	4.83	1.94e-05	3.16e-03	yes	up	PREDICTED: uncharacterized protein LOC103487165 [Cucumis melo]	_	_	_	_
c105508_g3	0.00	156.00	0.000	11.267	6.83	1.94e-05	3.16e-03	yes	up	GTPase IMAP family member 7 [Crassostrea gigas]	_	_	_	PF04548.13|AIG1|AIG1 family|m.56702:10-205;PF01926.20|MMR_HSR1|50S ribosome-binding GTPase|m.56702:11-131;PF04670.9|Gtr1_RagA|Gtr1/RagA G protein conserved region|m.56702:11-140;PF02421.15|FeoB_N|Ferrous iron transport protein B|m.56702:11-146
c95380_g1	220.00	5.00	19.501	0.270	-5.73	1.95e-05	3.16e-03	yes	down	uncharacterized protein LOC735074 [Xenopus laevis]	RecName: Full=40S ribosomal protein S2	SJCHGC06175 protein	RP-S2e, RPS2	PF00333.17|Ribosomal_S5|Ribosomal protein S5, N-terminal domain|m.5062:83-147;PF03719.12|Ribosomal_S5_C|Ribosomal protein S5, C-terminal domain|m.5062:166-237
c73508_g2	85.00	0.00	32.636	0.000	-8.35	2.06e-05	3.27e-03	yes	down	_	_	_	_	_
c113367_g4	85.00	0.00	6.427	0.000	-6.03	2.06e-05	3.27e-03	yes	down	Collectin-12 [Crassostrea gigas]	_	_	MRC	PF00059.18|Lectin_C|Lectin C-type domain|m.31098:35-139
c124337_g5	85.00	0.00	2.957	0.000	-4.93	2.06e-05	3.27e-03	yes	down	_	_	_	_	_
c21788_g1	0.00	154.00	0.000	5.252	5.74	2.06e-05	3.27e-03	yes	up	_	_	_	_	_
c115003_g1	0.00	154.00	0.000	2.619	4.77	2.06e-05	3.27e-03	yes	up	_	_	_	_	_
c117911_g1	130.00	2.00	15.408	0.135	-6.04	2.08e-05	3.30e-03	yes	down	PREDICTED: von Willebrand factor C domain-containing protein 2-like [Aplysia californica]	_	_	_	_
c102379_g1	799.00	23.00	46.053	0.797	-5.69	2.10e-05	3.32e-03	yes	down	_	_	_	_	_
c108223_g1	83.00	0.00	3.580	0.000	-5.20	2.18e-05	3.41e-03	yes	down	_	_	_	_	_
c118160_g1	0.00	151.00	0.000	3.072	4.99	2.18e-05	3.41e-03	yes	up	PREDICTED: uncharacterized protein LOC101857434 [Aplysia californica]	_	_	_	_
c114387_g1	83.00	1.00	5.621	0.054	-5.22	2.18e-05	3.41e-03	yes	down	PREDICTED: LOW QUALITY PROTEIN: general transcription factor II-I repeat domain-containing protein 2B-like [Chrysemys picta bellii]	_	_	_	_
c102234_g1	8983.00	294.00	211.104	4.125	-5.64	2.20e-05	3.43e-03	yes	down	hypothetical protein LOTGIDRAFT_125418 [Lottia gigantea]	RecName: Full=Serine proteinase stubble; AltName: Full=Protein stubble-stubbloid; Contains: RecName: Full=Serine proteinase stubble non-catalytic chain; Contains: R	_	CTRL	PF00089.23|Trypsin|Trypsin|m.71598:467-705
c112192_g1	82.00	0.00	20.222	0.000	-7.67	2.32e-05	3.56e-03	yes	down	hypothetical protein [Clostridium carboxidivorans]	_	_	_	_
c111809_g3	82.00	0.00	10.423	0.000	-6.72	2.32e-05	3.56e-03	yes	down	_	_	_	_	_
c100682_g1	0.00	149.00	0.000	21.960	7.79	2.32e-05	3.56e-03	yes	up	_	_	_	_	_
c102664_g1	0.00	148.00	0.000	4.179	5.42	2.32e-05	3.56e-03	yes	up	_	_	_	_	_
c85185_g1	22378.00	753.00	15418.159	328.263	-5.55	2.38e-05	3.58e-03	yes	down	_	_	_	_	_
c117903_g1	11.00	1264.00	0.305	20.711	5.68	2.39e-05	3.58e-03	yes	up	Collagen alpha-4(VI) chain [Crassostrea gigas]	_	_	PTPRQ	PF00092.25|VWA|von Willebrand factor type A domain|m.40667:187-359;PF13519.3|VWA_2|von Willebrand factor type A domain|m.40667:188-299
c111123_g1	81.00	0.00	6.781	0.000	-6.10	2.40e-05	3.58e-03	yes	down	_	_	_	_	_
c108704_g1	81.00	0.00	10.447	0.000	-6.72	2.40e-05	3.58e-03	yes	down	_	_	_	_	_
c166219_g1	81.00	0.00	16.984	0.000	-7.42	2.40e-05	3.58e-03	yes	down	_	_	_	_	_
c12186_g1	81.00	0.00	24.450	0.000	-7.94	2.40e-05	3.58e-03	yes	down	hypothetical protein [Prevotella sp. oral taxon 473]	_	_	_	_
c99009_g1	81.00	1.00	10.276	0.074	-5.90	2.40e-05	3.58e-03	yes	down	_	_	_	_	_
c119268_g2	80.00	1.00	4.313	0.034	-5.04	2.47e-05	3.68e-03	yes	down	GTPase IMAP family member 4 [Crassostrea gigas]	RecName: Full=GTPase IMAP family member 4; AltName: Full=Immunity-associated nucleotide 1 protein; Short=IAN-1; AltName: Full=Immunity-associated protein 4 [Rattus n	_	_	PF04548.13|AIG1|AIG1 family|m.46489:16-210
c100982_g2	4.00	592.00	0.709	64.990	6.33	2.51e-05	3.73e-03	yes	up	_	_	_	_	_
c101269_g1	0.00	144.00	0.000	1.350	3.86	2.55e-05	3.77e-03	yes	up	PREDICTED: uncharacterized protein LOC101862849 isoform X1 [Aplysia californica]	_	_	_	_
c111266_g6	79.00	0.00	10.557	0.000	-6.74	2.64e-05	3.83e-03	yes	down	_	_	_	_	_
c123674_g1	79.00	0.00	1.918	0.000	-4.33	2.64e-05	3.83e-03	yes	down	PREDICTED: uncharacterized protein LOC101862849 isoform X1 [Aplysia californica]	_	_	_	_
c120910_g4	79.00	0.00	8.260	0.000	-6.39	2.64e-05	3.83e-03	yes	down	_	_	_	_	_
c114903_g4	0.00	143.00	0.000	2.518	4.71	2.64e-05	3.83e-03	yes	up	_	_	_	_	_
c109411_g1	0.00	143.00	0.000	5.205	5.73	2.64e-05	3.83e-03	yes	up	_	_	_	_	_
c104557_g1	2063.00	69.00	73.545	1.472	-5.55	2.68e-05	3.87e-03	yes	down	_	_	_	_	_
c120302_g1	108.00	10590.00	3.580	208.666	5.83	2.69e-05	3.88e-03	yes	up	PREDICTED: sulfotransferase family cytosolic 1B member 1-like [Aplysia californica]	RecName: Full=Sulfotransferase family cytosolic 1B member 1; Short=ST1B1; Short=Sulfotransferase 1B1	_	_	PF00685.24|Sulfotransfer_1|Sulfotransferase domain|m.21836:67-310
c107154_g9	0.00	142.00	0.000	13.630	7.10	2.72e-05	3.89e-03	yes	up	_	_	_	_	_
c69971_g1	0.00	142.00	0.000	2.383	4.63	2.72e-05	3.89e-03	yes	up	_	_	_	_	_
c95435_g1	0.00	141.00	0.000	6.022	5.94	2.72e-05	3.89e-03	yes	up	_	_	_	_	_
c113626_g1	41916.00	1475.00	2828.772	59.812	-5.56	2.74e-05	3.90e-03	yes	down	_	_	_	_	_
c105030_g3	77.00	0.00	23.008	0.000	-7.85	2.81e-05	3.97e-03	yes	down	_	_	_	_	_
c95886_g1	0.00	140.00	0.000	1.458	3.96	2.81e-05	3.97e-03	yes	up	PREDICTED: uncharacterized protein LOC100888562 [Strongylocentrotus purpuratus]	_	_	_	_
c94275_g1	619.00	19.00	194.377	7.149	-4.75	2.83e-05	3.98e-03	yes	down	_	_	_	_	_
c120645_g1	157.00	3.00	5.633	0.068	-5.09	2.91e-05	4.06e-03	yes	down	_	_	_	_	_
c118147_g1	0.00	139.00	0.000	4.246	5.44	2.91e-05	4.06e-03	yes	up	_	_	_	_	_
c73086_g2	76.00	0.00	7.502	0.000	-6.25	3.00e-05	4.17e-03	yes	down	_	_	_	_	_
c107946_g1	76.00	1.00	4.765	0.041	-5.11	3.00e-05	4.17e-03	yes	down	PREDICTED: cadherin-related family member 2 isoform X2 [Gallus gallus]	RecName: Full=Protocadherin alpha-4; Short=PCDH-alpha-4; Flags: Precursor [Homo sapiens]	_	CDHR2, PCDH24, PCLKC	PF00028.14|Cadherin|Cadherin domain|m.45609:15-109
c102543_g1	75.00	0.00	6.500	0.000	-6.04	3.11e-05	4.24e-03	yes	down	_	_	_	_	_
c80697_g1	75.00	0.00	4.179	0.000	-5.42	3.11e-05	4.24e-03	yes	down	hypothetical protein T265_10576 [Opisthorchis viverrini]	_	SJCHGC06753 protein	_	PF04845.10|PurA|PurA ssDNA and RNA-binding protein|m.54184:17-227
c107299_g1	75.00	0.00	3.287	0.000	-5.08	3.11e-05	4.24e-03	yes	down	_	_	_	_	_
c112605_g2	75.00	0.00	2.651	0.000	-4.78	3.11e-05	4.24e-03	yes	down	_	_	_	_	_
c95580_g1	0.00	136.00	0.000	5.407	5.78	3.11e-05	4.24e-03	yes	up	_	_	_	_	_
c113067_g1	191.00	5.00	20.491	0.324	-5.60	3.16e-05	4.31e-03	yes	down	_	_	_	_	_
c118578_g3	228.00	6.00	14.149	0.223	-5.46	3.19e-05	4.32e-03	yes	down	_	_	_	_	PF07177.9|Neuralized|Neuralized|m.3265:127-189
c153162_g1	190.00	4.00	28.922	0.371	-5.95	3.21e-05	4.32e-03	yes	down	myoglobin 1 [Paragonimus westermani]	RecName: Full=Globin; AltName: Full=Myoglobin	_	_	PF00042.19|Globin|Globin|m.6499:34-119
c14334_g1	0.00	135.00	0.000	7.392	6.23	3.21e-05	4.32e-03	yes	up	hypothetical protein H072_104 [Dactylellina haptotyla CBS 200.50]	_	_	_	_
c92671_g2	0.00	135.00	0.000	2.235	4.55	3.21e-05	4.32e-03	yes	up	_	_	_	_	_
c119276_g1	2981.00	108.00	177.563	34.949	-2.34	3.23e-05	4.33e-03	yes	down	_	_	_	_	_
c106072_g1	151.00	3.00	20.088	0.243	-5.88	3.32e-05	4.42e-03	yes	down	lectin-C1 [Musca domestica]	_	_	MRC	PF00059.18|Lectin_C|Lectin C-type domain|m.73916:39-144
c106953_g1	0.00	133.00	0.000	9.033	6.51	3.33e-05	4.42e-03	yes	up	_	_	_	_	_
c123637_g3	52.00	4850.00	2.260	126.685	5.75	3.42e-05	4.52e-03	yes	up	PREDICTED: cytochrome P450 3A12-like [Myotis lucifugus]	_	_	CYP3A4	PF00067.19|p450|Cytochrome P450|m.40487:43-288
c72975_g1	73.00	0.00	5.425	0.000	-5.79	3.44e-05	4.52e-03	yes	down	_	_	_	_	_
c115718_g2	73.00	0.00	2.554	0.000	-4.73	3.44e-05	4.52e-03	yes	down	_	_	_	_	_
c110695_g2	73.00	0.00	6.610	0.000	-6.07	3.44e-05	4.52e-03	yes	down	_	_	_	_	_
c115728_g1	835.00	29.00	26.649	0.554	-5.35	3.48e-05	4.56e-03	yes	down	_	_	_	_	_
c109783_g2	796.00	27.00	47.690	0.972	-5.48	3.52e-05	4.59e-03	yes	down	Short-chain collagen C4 [Crassostrea gigas]	_	_	_	_
c87474_g1	72.00	0.00	3.458	0.000	-5.15	3.56e-05	4.59e-03	yes	down	_	_	_	_	_
c142676_g1	72.00	0.00	3.629	0.000	-5.22	3.56e-05	4.59e-03	yes	down	_	_	_	_	_
c116241_g10	72.00	0.00	2.798	0.000	-4.86	3.56e-05	4.59e-03	yes	down	_	_	_	_	_
c129243_g1	72.00	0.00	1.442	0.000	-3.95	3.56e-05	4.59e-03	yes	down	_	_	_	_	_
c73940_g1	71.00	0.00	7.612	0.000	-6.27	3.69e-05	4.70e-03	yes	down	_	_	_	_	_
c181901_g1	71.00	0.00	10.911	0.000	-6.78	3.69e-05	4.70e-03	yes	down	_	_	_	_	_
c90540_g1	0.00	130.00	0.000	6.292	6.00	3.69e-05	4.70e-03	yes	up	_	_	_	_	_
c103535_g1	71.00	1.00	3.275	0.020	-4.81	3.69e-05	4.70e-03	yes	down	_	_	_	_	_
c113440_g2	0.00	128.00	0.000	1.647	4.13	3.83e-05	4.85e-03	yes	up	_	_	_	_	_
c121036_g9	12.00	1229.00	0.525	32.161	5.69	3.85e-05	4.88e-03	yes	up	_	_	_	_	_
c90486_g1	70.00	0.00	4.680	0.000	-5.58	3.97e-05	5.00e-03	yes	down	_	_	_	_	_
c108432_g1	6033.00	235.00	230.019	5.367	-5.40	4.03e-05	5.06e-03	yes	down	_	_	_	_	_
c127578_g1	1040.00	38.00	16.434	0.358	-5.17	4.04e-05	5.07e-03	yes	down	PREDICTED: acid trehalase-like protein 1-like isoform X1 [Pundamilia nyererei]	RecName: Full=Acid trehalase-like protein 1	_	_	PF03632.12|Glyco_hydro_65m|Glycosyl hydrolase family 65 central catalytic domain|m.21896:326-661
c82290_g1	0.00	126.00	0.000	2.714	4.81	4.11e-05	5.09e-03	yes	up	_	_	_	_	_
c123918_g5	0.00	126.00	0.000	3.254	5.07	4.11e-05	5.09e-03	yes	up	_	_	_	_	_
c117968_g4	0.00	125.00	0.000	9.944	6.65	4.11e-05	5.09e-03	yes	up	_	_	_	_	_
c1181_g1	0.00	125.00	0.000	8.432	6.41	4.11e-05	5.09e-03	yes	up	_	_	_	_	PF04970.10|LRAT|Lecithin retinol acyltransferase|m.39605:14-88
c104850_g1	176.00	4.00	10.960	0.149	-5.47	4.17e-05	5.14e-03	yes	down	_	_	_	_	PF01693.13|Cauli_VI|Caulimovirus viroplasmin|m.38989:6-49
c115440_g1	176.00	5.00	12.781	0.216	-5.35	4.17e-05	5.14e-03	yes	down	_	_	_	_	_
c105770_g1	0.00	124.00	0.000	3.227	5.06	4.27e-05	5.23e-03	yes	up	_	_	_	_	_
c153859_g1	68.00	0.00	82.733	0.000	-9.69	4.43e-05	5.40e-03	yes	down	_	_	_	_	_
c93477_g1	68.00	0.00	11.901	0.000	-6.91	4.43e-05	5.40e-03	yes	down	Fibrillin-1 [Crassostrea gigas]	_	_	FBLN1_2	PF07974.10|EGF_2|EGF-like domain|m.7354:75-114
c85166_g1	104.00	2.00	4.741	0.054	-4.97	4.46e-05	5.42e-03	yes	down	enolase [Echinostoma caproni]	RecName: Full=Enolase; AltName: Full=2-phospho-D-glycerate hydro-lyase; AltName: Full=2-phosphoglycerate dehydratase [Fasciola hepatica]	Enolase (EC 4.2.1.11)	ENO, eno	PF00113.19|Enolase_C|Enolase, C-terminal TIM barrel domain|m.32576:144-432;PF03952.13|Enolase_N|Enolase, N-terminal domain|m.32576:5-135;PF13378.3|MR_MLE_C|Enolase C-terminal domain-like|m.32576:253-373;PF07476.8|MAAL_C|Methylaspartate ammonia-lyase C-terminus|m.32576:313-381
c123637_g4	65.00	5490.00	3.592	182.494	5.63	4.58e-05	5.55e-03	yes	up	hypothetical protein LOTGIDRAFT_223980 [Lottia gigantea]	RecName: Full=Lithocholate 6-beta-hydroxylase; Short=6 beta-hydroxylase; AltName: Full=CYPIIIA10; AltName: Full=Cytochrome P450 3A10	_	CYP3C	PF00067.19|p450|Cytochrome P450|m.31536:42-287
c120444_g1	0.00	121.00	0.000	1.701	4.17	4.60e-05	5.56e-03	yes	up	PREDICTED: uncharacterized protein LOC101862849 isoform X1 [Aplysia californica]	_	_	_	_
c111809_g1	170.00	4.00	6.684	0.095	-5.12	4.69e-05	5.66e-03	yes	down	_	_	_	_	_
c120694_g1	434.00	15.00	16.593	0.344	-5.23	4.76e-05	5.67e-03	yes	down	_	_	_	_	_
c119498_g2	66.00	0.00	2.505	0.000	-4.70	4.77e-05	5.67e-03	yes	down	_	_	_	_	_
c113013_g3	0.00	120.00	0.000	3.477	5.16	4.77e-05	5.67e-03	yes	up	PREDICTED: HRAS-like suppressor 3-like isoform X1 [Aplysia californica]	_	_	_	PF04970.10|LRAT|Lecithin retinol acyltransferase|m.40838:33-170
c111113_g1	0.00	120.00	0.000	2.275	4.57	4.77e-05	5.67e-03	yes	up	_	_	_	_	_
c113907_g1	66.00	1.00	1.295	0.014	-3.61	4.77e-05	5.67e-03	yes	down	_	_	_	_	_
c119773_g1	5248.00	216.00	338.253	8.742	-5.26	4.89e-05	5.79e-03	yes	down	_	_	_	_	_
c113167_g2	0.00	119.00	0.000	2.727	4.82	4.96e-05	5.84e-03	yes	up	_	_	_	_	_
c48083_g1	0.00	119.00	0.000	7.271	6.20	4.96e-05	5.84e-03	yes	up	_	_	_	_	_
c123637_g1	113.00	9201.00	7.087	376.606	5.71	5.01e-05	5.88e-03	yes	up	PREDICTED: cytochrome P450 3A41-like [Aplysia californica]	RecName: Full=Cytochrome P450 3A41 [Mus musculus]	_	TBXAS1, CYP5A	PF00067.19|p450|Cytochrome P450|m.24944:2-160
c90795_g1	133.00	3.00	74.168	1.080	-5.98	5.09e-05	5.96e-03	yes	down	_	_	_	_	_
c120895_g1	65.00	0.00	5.572	0.000	-5.83	5.15e-05	5.97e-03	yes	down	Tryptase [Crassostrea gigas]	RecName: Full=BTB and MATH domain-containing protein 42 [Caenorhabditis elegans]	_	_	PF00651.28|BTB|BTB/POZ domain|m.18285:17-119
c96550_g1	65.00	0.00	2.859	0.000	-4.89	5.15e-05	5.97e-03	yes	down	_	_	_	_	_
c116963_g3	0.00	117.00	0.000	3.625	5.22	5.15e-05	5.97e-03	yes	up	_	_	_	_	_
c109783_g3	65.00	1.00	3.886	0.034	-4.89	5.15e-05	5.97e-03	yes	down	PREDICTED: short-chain collagen C4-like [Amphimedon queenslandica]	_	_	_	_
c109226_g5	13.00	1186.00	0.281	14.514	5.26	5.19e-05	6.00e-03	yes	up	Cubilin [Pteropus alecto]	_	_	CUBN	PF00431.17|CUB|CUB domain|m.40846:169-279;PF00431.17|CUB|CUB domain|m.40846:285-400;PF00431.17|CUB|CUB domain|m.40846:408-528;PF00431.17|CUB|CUB domain|m.40846:540-648;PF00431.17|CUB|CUB domain|m.40846:777-886
c119034_g1	11403.00	482.00	673.879	17.140	-5.29	5.27e-05	6.07e-03	yes	down	_	_	_	_	PF04089.11|BRICHOS|BRICHOS domain|m.10993:69-156
c104017_g1	7124.00	301.00	464.082	11.814	-5.28	5.31e-05	6.10e-03	yes	down	_	_	_	_	_
c102441_g2	896.00	36.00	64.857	3.213	-4.29	5.34e-05	6.10e-03	yes	down	PREDICTED: galactose-specific lectin nattectin-like [Poecilia reticulata]	_	_	CD207	PF00059.18|Lectin_C|Lectin C-type domain|m.28691:49-154
c111048_g1	64.00	0.00	1.332	0.000	-3.84	5.36e-05	6.10e-03	yes	down	hypothetical protein LOTGIDRAFT_233072 [Lottia gigantea]	_	_	CD163	PF00530.15|SRCR|Scavenger receptor cysteine-rich domain|m.66132:26-108;PF00530.15|SRCR|Scavenger receptor cysteine-rich domain|m.66132:367-447;PF00530.15|SRCR|Scavenger receptor cysteine-rich domain|m.66132:695-785
c125021_g5	0.00	116.00	0.000	5.704	5.86	5.36e-05	6.10e-03	yes	up	_	_	_	_	_
c126191_g3	639.00	25.00	28.739	0.878	-4.88	5.42e-05	6.16e-03	yes	down	PREDICTED: balbiani ring protein 3-like [Aplysia californica]	_	_	_	PF03128.11|CXCXC|CXCXC repeat|m.61853:3-15
c129270_g1	384.00	14.00	6.647	0.142	-4.80	5.54e-05	6.27e-03	yes	down	PREDICTED: formin-like protein 5-like [Aplysia californica]	RecName: Full=Protocadherin Fat 3; AltName: Full=FAT tumor suppressor homolog 3; Flags: Precursor [Mus musculus]	_	FAT4	_
c19276_g1	0.00	114.00	0.000	1.694	4.17	5.57e-05	6.28e-03	yes	up	hypothetical protein LOTGIDRAFT_114905, partial [Lottia gigantea]	_	_	_	PF07732.12|Cu-oxidase_3|Multicopper oxidase|m.65272:99-206;PF07731.11|Cu-oxidase_2|Multicopper oxidase|m.65272:517-634;PF00394.19|Cu-oxidase|Multicopper oxidase|m.65272:222-383
c113886_g1	0.00	114.00	0.000	1.850	4.29	5.57e-05	6.28e-03	yes	up	_	_	_	_	_
c127585_g1	633.00	25.00	11.449	0.270	-4.96	5.60e-05	6.29e-03	yes	down	hypothetical protein LOTGIDRAFT_235128 [Lottia gigantea]	RecName: Full=Zinc metalloproteinase-disintegrin-like MTP4; AltName: Full=Snake venom metalloproteinase; Short=SVMP; Flags: Precursor [Drysdalia coronoides]	_	ADAMTS12	PF13688.3|Reprolysin_5|Metallo-peptidase family M12|m.71256:224-413;PF13582.3|Reprolysin_3|Metallo-peptidase family M12B Reprolysin-like|m.71256:255-398;PF01421.16|Reprolysin|Reprolysin (M12B) family zinc metalloprotease|m.71256:303-444;PF13574.3|Reprolysin_2|Metallo-peptidase family M12B Reprolysin-like|m.71256:351-440;PF13583.3|Reprolysin_4|Metallo-peptidase family M12B Reprolysin-like|m.71256:…
c98567_g1	5174.00	222.00	950.231	25.255	-5.23	5.70e-05	6.39e-03	yes	down	_	_	_	_	_
c119096_g1	96.00	2.00	5.315	0.115	-4.65	5.89e-05	6.58e-03	yes	down	_	_	_	_	_
c119471_g1	2192.00	94.00	102.552	2.660	-5.22	5.93e-05	6.60e-03	yes	down	_	_	_	_	_
c110475_g3	1.00	233.00	0.024	3.895	5.01	5.94e-05	6.60e-03	yes	up	_	_	_	_	PF12773.4|DZR|Double zinc ribbon|m.70883:3-46
c99963_g1	62.00	0.00	20.980	0.000	-7.72	6.04e-05	6.64e-03	yes	down	putative 60s ribosomal protein L28 [Schistosoma mansoni]	_	Putative uncharacterized protein	RP-L28e, RPL28	PF01778.14|Ribosomal_L28e|Ribosomal L28e protein family|m.36697:14-126
c111243_g1	62.00	0.00	1.430	0.000	-3.94	6.04e-05	6.64e-03	yes	down	PREDICTED: uncharacterized protein LOC101862849 isoform X1 [Aplysia californica]	_	_	_	PF13604.3|AAA_30|AAA domain|m.20319:46-159
c110335_g4	62.00	0.00	24.853	0.000	-7.96	6.04e-05	6.64e-03	yes	down	_	_	_	_	_
c126265_g1	0.00	112.00	0.000	2.572	4.74	6.04e-05	6.64e-03	yes	up	_	_	_	_	_
c115907_g5	1.00	230.00	0.037	4.246	4.99	6.18e-05	6.78e-03	yes	up	_	_	_	_	_
c115644_g1	61.00	0.00	3.165	0.000	-5.03	6.29e-05	6.82e-03	yes	down	RNAase [Paenibacillus sp. hypothetical protein WG8_3693 [Paenibacillus sp. Aloe-11]	_	_	_	_
c103287_g1	0.00	111.00	0.000	1.809	4.25	6.29e-05	6.82e-03	yes	up	_	_	_	_	_
c107073_g6	0.00	111.00	0.000	6.055	5.94	6.29e-05	6.82e-03	yes	up	_	_	_	_	_
c26279_g1	0.00	110.00	0.000	4.456	5.51	6.29e-05	6.82e-03	yes	up	_	_	_	_	_
c112297_g6	338.00	12.00	22.287	0.581	-5.04	6.38e-05	6.91e-03	yes	down	_	_	_	_	_
c127149_g1	7462.00	334.00	243.630	6.521	-5.20	6.42e-05	6.93e-03	yes	down	_	_	_	_	_
c120464_g1	185.00	6.00	6.268	0.122	-4.84	6.53e-05	6.97e-03	yes	down	PREDICTED: uncharacterized protein LOC101851710 [Aplysia californica]	_	_	_	PF03067.12|LPMO_10|Lytic polysaccharide mono-oxygenase, cellulose-degrading|m.49356:26-215
c9271_g1	60.00	0.00	5.865	0.000	-5.90	6.56e-05	6.97e-03	yes	down	_	_	_	_	_
c108852_g1	60.00	0.00	3.568	0.000	-5.20	6.56e-05	6.97e-03	yes	down	_	_	_	_	_
c31915_g1	60.00	0.00	2.236	0.000	-4.55	6.56e-05	6.97e-03	yes	down	_	_	_	_	_
c90666_g1	60.00	0.00	5.645	0.000	-5.84	6.56e-05	6.97e-03	yes	down	alpha tubulin [Ixodes scapularis]	RecName: Full=Tubulin alpha chain	alpha tubulin; Tubulin is the major constituent of microtubules. It binds two moles of GTP, [...]	TUBA	PF03953.14|Tubulin_C|Tubulin C-terminal domain|m.24922:84-212;PF00091.22|Tubulin|Tubulin/FtsZ family, GTPase domain|m.24922:2-34
c105077_g1	60.00	0.00	4.093	0.000	-5.39	6.56e-05	6.97e-03	yes	down	_	_	_	_	_
c125832_g2	245.00	8.00	10.093	0.155	-5.32	6.58e-05	6.98e-03	yes	down	Deleted in malignant brain tumors 1 protein [Crassostrea gigas]	_	_	_	PF00530.15|SRCR|Scavenger receptor cysteine-rich domain|m.67833:1-65;PF00530.15|SRCR|Scavenger receptor cysteine-rich domain|m.67833:77-173;PF00530.15|SRCR|Scavenger receptor cysteine-rich domain|m.67833:189-282;PF00530.15|SRCR|Scavenger receptor cysteine-rich domain|m.67833:298-391;PF00530.15|SRCR|Scavenger receptor cysteine-rich domain|m.67833:403-498
c81162_g1	842.00	35.00	197.321	5.137	-5.24	6.61e-05	6.98e-03	yes	down	_	_	_	_	_
c73210_g1	92.00	2.00	30.180	0.419	-5.87	6.74e-05	7.10e-03	yes	down	hypothetical protein T265_04276 [Opisthorchis viverrini]	_	SJCHGC00723 protein	RP-S17e, RPS17	PF00833.15|Ribosomal_S17e|Ribosomal S17|m.38522:1-118
c108997_g1	0.00	108.00	0.000	3.308	5.09	6.84e-05	7.19e-03	yes	up	_	_	_	_	_
c130118_g2	5.00	494.00	0.098	6.569	5.07	7.01e-05	7.35e-03	yes	up	_	_	_	_	_
c111724_g1	298.00	11.00	16.092	0.351	-5.17	7.12e-05	7.42e-03	yes	down	_	_	_	_	_
c85771_g1	59.00	0.00	4.545	0.000	-5.54	7.13e-05	7.42e-03	yes	down	_	_	_	_	_
c128516_g1	59.00	0.00	1.173	0.000	-3.67	7.13e-05	7.42e-03	yes	down	_	_	_	_	_
c92725_g1	1403.00	62.00	100.964	2.694	-5.18	7.19e-05	7.47e-03	yes	down	_	_	_	_	_
c106691_g1	16.00	1286.00	0.367	17.545	5.24	7.31e-05	7.56e-03	yes	up	_	_	_	_	_
c115826_g2	1908.00	87.00	313.607	8.817	-5.14	7.44e-05	7.56e-03	yes	down	_	_	_	_	_
c105340_g2	58.00	0.00	13.001	0.000	-7.03	7.44e-05	7.56e-03	yes	down	PREDICTED: uncharacterized protein LOC101849279 [Aplysia californica]	_	_	FBLN1_2	PF14670.3|FXa_inhibition|Coagulation Factor Xa inhibitory site|m.65287:39-74;PF14670.3|FXa_inhibition|Coagulation Factor Xa inhibitory site|m.65287:124-160;PF07645.12|EGF_CA|Calcium-binding EGF domain|m.65287:3-27;PF07645.12|EGF_CA|Calcium-binding EGF domain|m.65287:35-74;PF00008.24|EGF|EGF-like domain|m.65287:3-27
c100264_g2	58.00	0.00	7.698	0.000	-6.29	7.44e-05	7.56e-03	yes	down	_	_	_	_	_
c94951_g1	58.00	0.00	3.800	0.000	-5.29	7.44e-05	7.56e-03	yes	down	_	_	_	_	_
c118343_g3	0.00	105.00	0.000	5.110	5.70	7.44e-05	7.56e-03	yes	up	_	_	_	_	_
c100558_g2	0.00	105.00	0.000	3.132	5.01	7.44e-05	7.56e-03	yes	up	_	_	_	_	_
c100522_g1	58.00	1.00	6.977	0.074	-5.35	7.44e-05	7.56e-03	yes	down	_	_	_	_	_
c113224_g1	58.00	1.00	8.688	0.095	-5.49	7.44e-05	7.56e-03	yes	down	_	_	_	_	_
c116197_g1	322.00	13.00	23.069	0.560	-5.13	7.50e-05	7.59e-03	yes	down	hypothetical protein LOTGIDRAFT_165658 [Lottia gigantea]	_	_	_	PF09056.8|Phospholip_A2_3|Prokaryotic phospholipase A2|m.27452:28-103
c113935_g5	6.00	536.00	0.159	8.357	5.03	7.56e-05	7.63e-03	yes	up	_	_	_	_	_
c106791_g1	177.00	6.00	24.438	0.506	-5.34	7.61e-05	7.67e-03	yes	down	_	_	_	_	_
c70659_g1	2204.00	102.00	69.109	1.910	-5.11	7.68e-05	7.72e-03	yes	down	_	_	_	_	_
c116144_g2	633.00	27.00	54.557	4.402	-3.60	7.74e-05	7.72e-03	yes	down	PREDICTED: uncharacterized protein LOC103311248 [Acyrthosiphon pisum]	_	_	_	_
c109831_g1	57.00	0.00	6.354	0.000	-6.01	7.77e-05	7.72e-03	yes	down	_	_	_	_	_
c108578_g1	0.00	104.00	0.000	1.897	4.32	7.77e-05	7.72e-03	yes	up	Putative methylmalonate-semialdehyde dehydrogenase [acylating]	_	annotation not available	mmsA, iolA, ALDH6A1	PF00171.19|Aldedh|Aldehyde dehydrogenase family|m.56228:46-509
c98672_g1	0.00	104.00	0.000	5.833	5.89	7.77e-05	7.72e-03	yes	up	_	_	_	_	_
c85721_g1	262.00	10.00	13.062	0.297	-5.05	7.78e-05	7.72e-03	yes	down	_	_	_	_	PF01216.14|Calsequestrin|Calsequestrin|m.78117:104-174
c122118_g1	2.00	267.00	0.061	5.070	5.01	7.82e-05	7.75e-03	yes	up	_	_	_	_	_
c113202_g1	1.00	212.00	0.073	9.822	5.84	8.11e-05	7.95e-03	yes	up	_	_	_	_	_
c121013_g4	0.00	103.00	0.000	7.453	6.24	8.12e-05	7.95e-03	yes	up	_	_	_	_	_
c117707_g2	0.00	103.00	0.000	4.199	5.43	8.12e-05	7.95e-03	yes	up	_	_	_	_	_
c124716_g2	0.00	103.00	0.000	8.344	6.40	8.12e-05	7.95e-03	yes	up	PREDICTED: myb-like protein X-like [Danio rerio]	RecName: Full=GTPase IMAP family member 7; AltName: Full=Immunity-associated nucleotide 7 protein; Short=IAN-7 [Homo sapiens]	_	_	PF04548.13|AIG1|AIG1 family|m.48173:1-149
c186271_g1	0.00	102.00	0.000	7.439	6.24	8.12e-05	7.95e-03	yes	up	_	_	_	_	PF07177.9|Neuralized|Neuralized|m.12427:57-119
c111059_g1	25844.00	1249.00	2196.865	63.457	-5.11	8.18e-05	7.99e-03	yes	down	hypothetical protein LOTGIDRAFT_233660 [Lottia gigantea]	_	_	_	_
c105737_g1	87.00	2.00	2.725	0.041	-4.32	8.20e-05	7.99e-03	yes	down	_	_	_	_	_
c120761_g1	144.00	5.00	6.574	0.128	-4.87	8.39e-05	8.12e-03	yes	down	_	_	_	_	_
c127296_g6	86.00	2.00	12.976	0.182	-5.54	8.44e-05	8.12e-03	yes	down	_	_	_	_	_
c82219_g1	283.00	11.00	14.125	0.331	-5.04	8.47e-05	8.12e-03	yes	down	hypothetical protein T265_14198 [Opisthorchis viverrini]	RecName: Full=Y-box factor homolog; AltName: Full=APY1	SJCHGC00971 protein	_	PF00313.19|CSD|'Cold-shock' DNA-binding domain|m.2841:27-94
c64819_g1	56.00	0.00	5.144	0.000	-5.71	8.49e-05	8.12e-03	yes	down	_	_	_	_	PF04970.10|LRAT|Lecithin retinol acyltransferase|m.7267:4-49
c101764_g1	56.00	0.00	4.472	0.000	-5.51	8.49e-05	8.12e-03	yes	down	_	_	_	_	_
c120627_g1	56.00	0.00	24.376	0.000	-7.94	8.49e-05	8.12e-03	yes	down	_	_	_	_	_
c113633_g1	0.00	101.00	0.000	3.018	4.96	8.49e-05	8.12e-03	yes	up	_	_	_	_	_
c100135_g2	0.00	101.00	0.000	2.181	4.51	8.49e-05	8.12e-03	yes	up	PREDICTED: uncharacterized protein LOC101862849 isoform X1 [Aplysia californica]	_	_	_	_
c125997_g1	55.00	0.00	1.698	0.000	-4.17	8.88e-05	8.28e-03	yes	down	_	_	_	_	_
c143218_g1	55.00	0.00	2.370	0.000	-4.63	8.88e-05	8.28e-03	yes	down	_	_	_	_	_
c110191_g3	55.00	0.00	3.910	0.000	-5.33	8.88e-05	8.28e-03	yes	down	_	_	_	_	_
c189279_g1	55.00	0.00	11.681	0.000	-6.88	8.88e-05	8.28e-03	yes	down	_	_	_	_	_
c96577_g1	55.00	0.00	27.773	0.000	-8.12	8.88e-05	8.28e-03	yes	down	_	_	_	_	_
c75344_g1	55.00	0.00	16.801	0.000	-7.40	8.88e-05	8.28e-03	yes	down	_	_	_	_	_
c118243_g1	55.00	0.00	0.562	0.000	-2.73	8.88e-05	8.28e-03	yes	down	_	_	_	_	PF00791.17|ZU5|ZU5 domain|m.44436:667-760
c127379_g5	0.00	100.00	0.000	2.869	4.89	8.88e-05	8.28e-03	yes	up	_	_	_	_	_
c112238_g1	0.00	99.00	0.000	84.155	9.72	8.88e-05	8.28e-03	yes	up	_	_	_	_	_
c129923_g2	55.00	1.00	2.322	0.027	-4.25	8.88e-05	8.28e-03	yes	down	Multiple epidermal growth factor-like domains 10 [Crassostrea gigas]	_	_	_	PF00754.22|F5_F8_type_C|F5/8 type C domain|m.70082:35-153
c115111_g1	55.00	1.00	3.226	0.034	-4.63	8.88e-05	8.28e-03	yes	down	cathepsin B1 isotype 2 precursor [Trichobilharzia regenti]	RecName: Full=Cathepsin B-like cysteine proteinase; AltName: Full=Antigen Sj31; Flags: Precursor [Schistosoma japonicum]	_	CTSB	PF00112.20|Peptidase_C1|Papain family cysteine protease|m.45010:90-339
c105892_g1	16.00	1213.00	0.257	11.557	5.03	8.92e-05	8.29e-03	yes	up	C-type lectin A [Azumapecten farreri]	RecName: Full=Perlucin	_	_	PF00059.18|Lectin_C|Lectin C-type domain|m.48782:45-155;PF05473.9|UL45|UL45 protein, carbohydrate-binding C-type lectin-like|m.48782:10-62
c54965_g1	169.00	6.00	23.509	0.513	-5.27	8.93e-05	8.29e-03	yes	down	putative 40s ribosomal protein S9 [Schistosoma mansoni]	_	RpS9	RP-S9e, RPS9	PF01479.22|S4|S4 domain|m.37081:107-149;PF00163.16|Ribosomal_S4|Ribosomal protein S4/S9 N-terminal domain|m.37081:9-62
c130785_g1	2413.00	118.00	11.278	0.331	-4.72	9.23e-05	8.51e-03	yes	down	hypothetical protein CGI_10027189 [Crassostrea gigas]	RecName: Full=E-selectin; AltName: Full=CD62 antigen-like family member E; AltName: Full=Endothelial leukocyte adhesion molecule 1; Short=ELAM-1; AltName: Full=Leuko	_	_	PF00092.25|VWA|von Willebrand factor type A domain|m.47330:33-214
c102427_g2	54.00	0.00	3.996	0.000	-5.36	9.30e-05	8.51e-03	yes	down	_	_	_	_	_
c121441_g4	54.00	0.00	5.633	0.000	-5.84	9.30e-05	8.51e-03	yes	down	_	_	_	_	_
c86925_g1	54.00	0.00	1.808	0.000	-4.25	9.30e-05	8.51e-03	yes	down	mitochondrial acetate:succinate CoA-transferase [Fasciola hepatica]	_	_	_	PF13336.3|AcetylCoA_hyd_C|Acetyl-CoA hydrolase/transferase C-terminal domain|m.66912:345-499;PF02550.12|AcetylCoA_hydro|Acetyl-CoA hydrolase/transferase N-terminal domain|m.66912:90-244
c115206_g2	54.00	0.00	4.704	0.000	-5.59	9.30e-05	8.51e-03	yes	down	_	_	_	_	_
c48292_g1	0.00	98.00	0.000	6.575	6.06	9.30e-05	8.51e-03	yes	up	_	_	_	_	_
c114751_g1	1516.00	73.00	32.685	0.938	-4.98	9.33e-05	8.51e-03	yes	down	_	_	_	_	_
c101031_g1	139.00	4.00	14.980	0.263	-5.38	9.33e-05	8.51e-03	yes	down	small subunit ribosomal protein S6e [Clonorchis sinensis]	RecName: Full=40S ribosomal protein S6 [Drosophila melanogaster]	SJCHGC06246 protein	RP-S6e, RPS6	PF01092.16|Ribosomal_S6e|Ribosomal protein S6e|m.26497:1-126
c112462_g1	4.00	402.00	0.159	9.363	5.19	9.53e-05	8.67e-03	yes	up	_	_	_	_	_
c122228_g1	937.00	45.00	38.465	1.100	-5.01	9.77e-05	8.87e-03	yes	down	PREDICTED: uncharacterized protein LOC101848762 [Aplysia californica]	_	_	COL6A	PF00092.25|VWA|von Willebrand factor type A domain|m.52760:129-299;PF13519.3|VWA_2|von Willebrand factor type A domain|m.52760:130-241;PF13768.3|VWA_3|von Willebrand factor type A domain|m.52760:129-281;PF03128.11|CXCXC|CXCXC repeat|m.52760:68-80
c114006_g1	5906.00	299.00	303.356	9.323	-5.01	9.79e-05	8.87e-03	yes	down	hypothetical protein LOTGIDRAFT_232682 [Lottia gigantea]	_	_	_	_
c125669_g1	86.00	5802.00	1.796	72.287	5.25	9.85e-05	8.90e-03	yes	up	hypothetical protein LOTGIDRAFT_196500 [Lottia gigantea]	_	_	CYP1A1	PF00067.19|p450|Cytochrome P450|m.69890:56-515
c107319_g1	349.00	15.00	41.691	1.094	-5.13	1.00e-04	9.04e-03	yes	down	hypothetical protein RFI_36418, partial [Reticulomyxa filosa]	RecName: Full=Probable serine/threonine-protein kinase fhkB; AltName: Full=Forkhead-associated kinase protein B [Dictyostelium discoideum]	_	_	_
c106529_g2	692.00	33.00	44.330	0.803	-5.62	1.00e-04	9.04e-03	yes	down	_	_	_	_	_
c102811_g1	875.00	42.00	49.767	1.445	-5.01	1.01e-04	9.04e-03	yes	down	Protein SpAN [Crassostrea gigas]	_	_	_	PF00059.18|Lectin_C|Lectin C-type domain|m.40263:48-154
c114393_g1	0.00	96.00	0.000	3.274	5.08	1.02e-04	9.04e-03	yes	up	_	_	_	_	_
c115909_g4	0.00	96.00	0.000	1.316	3.82	1.02e-04	9.04e-03	yes	up	_	_	_	_	_
c98482_g1	0.00	96.00	0.000	2.808	4.86	1.02e-04	9.04e-03	yes	up	_	_	_	_	_
c86914_g1	0.00	95.00	0.000	1.519	4.02	1.02e-04	9.04e-03	yes	up	_	_	_	_	_
c112352_g2	0.00	95.00	0.000	2.856	4.89	1.02e-04	9.04e-03	yes	up	_	_	_	_	_
c126290_g3	0.00	95.00	0.000	1.897	4.32	1.02e-04	9.04e-03	yes	up	hypothetical protein LOTGIDRAFT_192667 [Lottia gigantea]	RecName: Full=Dynein heavy chain 5, axonemal; AltName: Full=Axonemal beta dynein heavy chain 5; AltName: Full=Ciliary dynein heavy chain 5 [Homo sapiens]	_	DNAH	PF12781.4|AAA_9|ATP-binding dynein motor region D5|m.3051:209-433;PF12777.4|MT|Microtubule-binding stalk of dynein motor|m.3051:1-184
c113559_g1	10454.00	538.00	393.347	12.118	-5.01	1.03e-04	9.11e-03	yes	down	_	_	_	_	PF14478.3|DUF4430|Domain of unknown function (DUF4430)|m.25339:75-152
c107971_g1	135.00	5.00	36.950	0.864	-5.26	1.04e-04	9.19e-03	yes	down	_	_	_	_	_
c95036_g1	52.00	0.00	39.186	0.000	-8.62	1.07e-04	9.31e-03	yes	down	elongation factor 1-beta, partial [Clonorchis sinensis]	RecName: Full=Elongation factor 1-beta; Short=EF-1-beta	_	EEF1B	_
c107697_g1	52.00	0.00	7.759	0.000	-6.30	1.07e-04	9.31e-03	yes	down	_	_	_	_	_
c91262_g2	52.00	0.00	8.675	0.000	-6.46	1.07e-04	9.31e-03	yes	down	_	_	_	_	_
c111266_g4	52.00	0.00	13.661	0.000	-7.10	1.07e-04	9.31e-03	yes	down	_	_	_	_	_
c94350_g1	0.00	94.00	0.000	4.658	5.57	1.07e-04	9.31e-03	yes	up	_	_	_	_	_
c174879_g1	0.00	94.00	0.000	6.839	6.12	1.07e-04	9.31e-03	yes	up	_	_	_	_	_
c86112_g1	211.00	8.00	16.178	0.371	-5.11	1.10e-04	9.53e-03	yes	down	hypothetical protein CLF_107885, partial [Clonorchis sinensis]	_	tyrosine 3-monooxygenase/tryptophan 5-monooxygenase activation protein, beta polypeptide	YWHAB_Q_Z	PF00244.17|14-3-3|14-3-3 protein|m.55987:21-239
c126253_g9	571.00	28.00	14.088	0.412	-4.79	1.10e-04	9.54e-03	yes	down	PREDICTED: hemocytin [Acyrthosiphon pisum]	_	_	_	_
c32657_g1	0.00	93.00	0.000	4.071	5.38	1.12e-04	9.69e-03	yes	up	_	_	_	_	_
c98018_g1	0.00	93.00	0.000	8.526	6.43	1.12e-04	9.69e-03	yes	up	_	_	_	_	_
c121036_g6	38.00	2536.00	2.102	84.364	5.26	1.13e-04	9.72e-03	yes	up	_	_	_	_	_
c125522_g2	79.00	2.00	11.535	0.034	-6.44	1.14e-04	9.80e-03	yes	down	Scavenger receptor class F member 2 [Crassostrea gigas]	_	_	STAB2, HARE	_
c109445_g1	79.00	2.00	5.291	0.081	-4.90	1.14e-04	9.80e-03	yes	down	PREDICTED: cornifelin homolog [Aplysia californica]	_	_	_	PF04749.14|PLAC8|PLAC8 family|m.21320:61-145
c121930_g1	234.00	10.00	18.670	0.486	-5.00	1.14e-04	9.80e-03	yes	down	_	_	_	_	PF15998.2|DUF4773|Domain of unknown function (DUF4773)|m.77442:61-166
c90911_g1	207.00	9.00	36.461	0.979	-5.08	1.16e-04	9.95e-03	yes	down	PREDICTED: C-type lectin domain family 4 member M-like [Haplochromis burtoni]	_	_	MRC	PF00059.18|Lectin_C|Lectin C-type domain|m.67071:37-141
c109775_g4	9.00	702.00	0.525	24.478	5.30	1.18e-04	9.96e-03	yes	up	_	_	_	_	_
c9610_g1	51.00	0.00	4.606	0.000	-5.56	1.18e-04	9.96e-03	yes	down	_	_	_	_	_
c104875_g1	0.00	92.00	0.000	2.640	4.78	1.18e-04	9.96e-03	yes	up	_	_	_	_	_
c112804_g1	0.00	92.00	0.000	5.495	5.81	1.18e-04	9.96e-03	yes	up	_	_	_	_	_
c117309_g6	0.00	91.00	0.000	2.829	4.87	1.18e-04	9.96e-03	yes	up	_	_	_	_	_
c75847_g1	78.00	2.00	8.260	0.128	-5.20	1.18e-04	9.96e-03	yes	down	anoxia-induced grl-like protein [Littorina littorea]	_	_	_	_
c116796_g1	358.00	17.00	19.623	0.560	-4.90	1.18e-04	9.96e-03	yes	down	_	_	_	_	_
c90027_g1	180.00	7.00	21.701	0.513	-5.15	1.20e-04	1.01e-02	yes	down	_	_	_	_	_
c108477_g1	9566.00	517.00	1246.659	41.227	-4.91	1.21e-04	1.02e-02	yes	down	hypothetical protein LOTGIDRAFT_165658 [Lottia gigantea]	_	_	_	PF09056.8|Phospholip_A2_3|Prokaryotic phospholipase A2|m.78269:21-101
c109841_g3	3657.00	197.00	1267.553	43.786	-4.85	1.23e-04	1.03e-02	yes	down	_	_	_	_	_
c115882_g1	3705.00	200.00	85.434	2.754	-4.91	1.24e-04	1.03e-02	yes	down	PREDICTED: LOW QUALITY PROTEIN: alpha-amylase 2B-like [Aplysia californica]	RecName: Full=Alpha-amylase A; AltName: Full=1,4-alpha-D-glucan glucanohydrolase; Flags: Precursor	_	E3.2.1.1, amyA, malS	_
c91297_g1	128.00	4.00	25.623	0.479	-5.47	1.24e-04	1.03e-02	yes	down	PREDICTED: temptin-like [Aplysia californica]	_	_	_	_
c123055_g1	50.00	0.00	7.417	0.000	-6.23	1.24e-04	1.03e-02	yes	down	_	_	_	_	_
c32500_g1	50.00	0.00	2.615	0.000	-4.76	1.24e-04	1.03e-02	yes	down	Mn-containing catalase [Burkholderia sordidicola]	RecName: Full=Uncharacterized protein YjqC [Bacillus subtilis subsp. subtilis str. 168]	Mn-containing catalase	K07217	PF05067.9|Mn_catalase|Manganese containing catalase|m.12953:1-296
c128676_g1	889.00	47.00	14.699	0.466	-4.71	1.29e-04	1.07e-02	yes	down	Matrilin-2 [Crassostrea gigas]	_	_	_	PF00092.25|VWA|von Willebrand factor type A domain|m.7240:194-366;PF00092.25|VWA|von Willebrand factor type A domain|m.7240:492-662;PF13519.3|VWA_2|von Willebrand factor type A domain|m.7240:195-306;PF13519.3|VWA_2|von Willebrand factor type A domain|m.7240:493-602;PF01607.21|CBM_14|Chitin binding Peritrophin-A domain|m.7240:886-929;PF13768.3|VWA_3|von Willebrand factor type A domain|m.7240:265-3…
c94186_g2	49.00	0.00	630.917	0.000	-12.62	1.30e-04	1.07e-02	yes	down	hypothetical protein [Escherichia sp. 3_2_53FAA]	_	_	_	_
c96152_g2	49.00	0.00	20.528	0.000	-7.69	1.30e-04	1.07e-02	yes	down	actin beta/gamma 1 [Clonorchis sinensis]	RecName: Full=Actin, clone 403; Flags: Precursor	_	ACTB_G1	PF00022.16|Actin|Actin|m.48563:1-132
c111984_g1	0.00	89.00	0.000	3.402	5.13	1.30e-04	1.07e-02	yes	up	_	_	_	_	_
c85394_g1	0.00	89.00	0.000	6.933	6.14	1.30e-04	1.07e-02	yes	up	_	_	_	_	_
c117427_g1	2108.00	114.00	78.860	2.552	-4.90	1.30e-04	1.07e-02	yes	down	scavenger receptor cysteine-rich protein precursor [Strongylocentrotus purpuratus]	_	_	_	PF00530.15|SRCR|Scavenger receptor cysteine-rich domain|m.68989:34-132;PF00530.15|SRCR|Scavenger receptor cysteine-rich domain|m.68989:142-240;PF00530.15|SRCR|Scavenger receptor cysteine-rich domain|m.68989:248-346;PF00530.15|SRCR|Scavenger receptor cysteine-rich domain|m.68989:356-454
c96960_g1	126.00	5.00	14.296	0.344	-5.02	1.31e-04	1.07e-02	yes	down	hypothetical protein T265_01328 [Opisthorchis viverrini]	RecName: Full=60S ribosomal protein L10a-2 [Drosophila melanogaster]	Putative uncharacterized protein	RP-L10Ae, RPL10A	PF00687.18|Ribosomal_L1|Ribosomal protein L1p/L10e family|m.26232:35-224
c90771_g1	200.00	9.00	41.947	1.175	-5.04	1.32e-04	1.08e-02	yes	down	hypothetical protein T265_01475 [Opisthorchis viverrini]	RecName: Full=Probable dynein light chain; AltName: Full=T-cell-stimulating antigen SM10	Putative uncharacterized protein	DYNLL	PF01221.15|Dynein_light|Dynein light chain type 1|m.11778:16-99
c99458_g1	0.00	87.00	0.000	1.499	4.00	1.37e-04	1.12e-02	yes	up	Multiple epidermal growth factor-like domains 10 [Crassostrea gigas]	RecName: Full=Angiopoietin-1 receptor; AltName: Full=Endothelial tyrosine kinase; AltName: Full=Tunica interna endothelial cell kinase; AltName: Full=Tyrosine kina	_	_	_
c156284_g1	124.00	5.00	8.260	0.203	-4.79	1.39e-04	1.13e-02	yes	down	MGC84815 protein [Xenopus MGC84815 protein [Xenopus laevis]	RecName: Full=Heterogeneous nuclear ribonucleoproteins A2/B1; Short=hnRNP A2/B1; AltName: Full=Vitamin D response element-binding protein 2; Short=VDRE-BP 2 [Saguin	SJCHGC06052 protein	HNRNPA1_3	PF00076.19|RRM_1|RNA recognition motif. (a.k.a. RRM, RBD, or RNP domain)|m.48876:41-100;PF00076.19|RRM_1|RNA recognition motif. (a.k.a. RRM, RBD, or RNP domain)|m.48876:131-188;PF16367.2|RRM_7|RNA recognition motif|m.48876:129-201
c129491_g1	2090.00	115.00	50.781	2.248	-4.44	1.40e-04	1.13e-02	yes	down	PREDICTED: von Willebrand factor C domain-containing protein 2-like [Aplysia californica]	_	_	_	_
c106005_g1	123.00	4.00	4.277	0.081	-4.60	1.42e-04	1.15e-02	yes	down	_	_	_	_	_
c123200_g3	48.00	0.00	3.006	0.000	-4.96	1.44e-04	1.15e-02	yes	down	_	_	_	_	_
c71643_g1	48.00	0.00	3.568	0.000	-5.20	1.44e-04	1.15e-02	yes	down	_	_	_	_	PF16101.2|PRIMA1|Proline-rich membrane anchor 1|m.78806:170-236
c74795_g1	48.00	0.00	6.671	0.000	-6.08	1.44e-04	1.15e-02	yes	down	PREDICTED: lactose-binding lectin l-2-like [Xiphophorus maculatus]	RecName: Full=Perlucin	_	MRC	PF00059.18|Lectin_C|Lectin C-type domain|m.11067:69-175;PF05473.9|UL45|UL45 protein, carbohydrate-binding C-type lectin-like|m.11067:39-94
c75005_g1	0.00	86.00	0.000	3.639	5.22	1.44e-04	1.15e-02	yes	up	_	_	_	_	_
c116580_g6	0.00	86.00	0.000	3.639	5.22	1.44e-04	1.15e-02	yes	up	_	_	_	_	_
c120192_g5	0.00	86.00	0.000	4.017	5.36	1.44e-04	1.15e-02	yes	up	_	_	_	_	_
c95057_g1	0.00	86.00	0.000	2.106	4.46	1.44e-04	1.15e-02	yes	up	_	_	_	_	_
c69103_g2	0.00	86.00	0.000	2.005	4.40	1.44e-04	1.15e-02	yes	up	_	_	_	_	_
c73251_g1	73.00	2.00	17.998	0.311	-5.46	1.49e-04	1.19e-02	yes	down	hypothetical protein T265_08204 [Opisthorchis viverrini]	_	SJCHGC01959 protein	RP-L26e, RPL26	PF16906.2|Ribosomal_L26|Ribosomal proteins L26 eukaryotic, L24P archaeal|m.69878:21-135
c113573_g1	334.00	17.00	56.512	1.775	-4.92	1.49e-04	1.19e-02	yes	down	hypothetical protein PHYSODRAFT_518672 [Phytophthora sojae]	RecName: Full=Turripeptide Pal9.2; Flags: Precursor	_	_	PF07648.12|Kazal_2|Kazal-type serine protease inhibitor domain|m.34149:39-62;PF07648.12|Kazal_2|Kazal-type serine protease inhibitor domain|m.34149:100-130;PF00050.18|Kazal_1|Kazal-type serine protease inhibitor domain|m.34149:35-79;PF00050.18|Kazal_1|Kazal-type serine protease inhibitor domain|m.34149:99-132
c120515_g1	240.00	11.00	20.393	0.554	-4.97	1.50e-04	1.19e-02	yes	down	cathepsin L [Fasciola hepatica]	_	_	CTSL	PF00112.20|Peptidase_C1|Papain family cysteine protease|m.66847:117-299;PF08246.9|Inhibitor_I29|Cathepsin propeptide inhibitor domain (I29)|m.66847:30-89
c131506_g1	0.00	85.00	0.000	3.976	5.35	1.52e-04	1.19e-02	yes	up	_	_	_	_	_
c125524_g1	0.00	85.00	0.000	2.592	4.75	1.52e-04	1.19e-02	yes	up	hypothetical protein LOTGIDRAFT_167232 [Lottia gigantea]	_	_	_	PF00754.22|F5_F8_type_C|F5/8 type C domain|m.63427:257-376
c15553_g1	0.00	85.00	0.000	3.963	5.34	1.52e-04	1.19e-02	yes	up	_	_	_	_	_
c49603_g1	0.00	85.00	0.000	2.302	4.59	1.52e-04	1.19e-02	yes	up	_	_	_	_	_
c74545_g1	0.00	85.00	0.000	6.440	6.03	1.52e-04	1.19e-02	yes	up	granulin precursor [Xenopus Grn-prov protein [Xenopus laevis]	RecName: Full=Granulins; AltName: Full=Proepithelin; Short=PEPI; Contains: RecName: Full=Acrogranin; AltName: Full=Glycoprotein of 88 Kda; AltName: Full=Progranulin;	_	_	PF00396.15|Granulin|Granulin|m.21496:60-100
c54198_g1	72.00	2.00	16.007	0.277	-5.42	1.54e-04	1.21e-02	yes	down	hypothetical protein T265_01451 [Opisthorchis viverrini]	RecName: Full=40S ribosomal protein S18	SJCHGC01887 protein	RP-S18e, RPS18	PF00416.19|Ribosomal_S13|Ribosomal protein S13/S18|m.4617:20-148
c67288_g1	71.00	2.00	176.415	3.146	-5.76	1.59e-04	1.23e-02	yes	down	_	_	_	_	_
c95797_g1	46.00	0.00	2.835	0.000	-4.88	1.60e-04	1.23e-02	yes	down	_	_	_	_	PF04548.13|AIG1|AIG1 family|m.8062:7-188
c11135_g1	46.00	0.00	2.175	0.000	-4.51	1.60e-04	1.23e-02	yes	down	_	_	_	_	_
c122896_g1	0.00	84.00	0.000	6.474	6.04	1.60e-04	1.23e-02	yes	up	_	_	_	_	_
c119982_g2	0.00	84.00	0.000	3.861	5.31	1.60e-04	1.23e-02	yes	up	_	_	_	_	_
c95964_g1	0.00	84.00	0.000	1.694	4.17	1.60e-04	1.23e-02	yes	up	_	_	_	PARP10_14_15	_
c105168_g1	0.00	84.00	0.000	7.142	6.18	1.60e-04	1.23e-02	yes	up	_	_	_	_	_
c88838_g2	0.00	83.00	0.000	3.686	5.24	1.60e-04	1.23e-02	yes	up	_	_	_	_	_
c109643_g7	0.00	83.00	0.000	12.367	6.96	1.60e-04	1.23e-02	yes	up	_	_	_	_	_
c112543_g2	303.00	15.00	7.783	0.230	-4.58	1.62e-04	1.25e-02	yes	down	hypothetical protein LOTGIDRAFT_231475 [Lottia gigantea]	RecName: Full=Stromelysin-3; Short=SL-3; Short=ST3; AltName: Full=Matrix metalloproteinase-11; Short=MMP-11; Flags: Precursor [Mus musculus]	_	MMP14	PF00413.21|Peptidase_M10|Matrixin|m.21770:164-317;PF00045.16|Hemopexin|Hemopexin|m.21770:411-443;PF00045.16|Hemopexin|Hemopexin|m.21770:508-546;PF01471.15|PG_binding_1|Putative peptidoglycan binding domain|m.21770:83-134
c120460_g1	4883.00	286.00	117.972	4.125	-4.80	1.63e-04	1.25e-02	yes	down	vitelline envelope zona pellucida domain 14, partial [Haliotis walallensis]	_	_	_	_
c124399_g3	7.00	509.00	0.770	34.031	5.29	1.66e-04	1.27e-02	yes	up	_	_	_	_	_
c108560_g2	5.00	381.00	0.367	14.919	5.01	1.68e-04	1.29e-02	yes	up	_	_	_	_	_
c114900_g2	0.00	82.00	0.000	5.603	5.83	1.69e-04	1.29e-02	yes	up	_	_	_	_	_
c112624_g1	0.00	82.00	0.000	2.484	4.69	1.69e-04	1.29e-02	yes	up	_	_	_	_	_
c87255_g1	0.00	82.00	0.000	2.599	4.75	1.69e-04	1.29e-02	yes	up	_	_	_	_	_
c112828_g1	70.00	2.00	3.238	0.054	-4.44	1.71e-04	1.30e-02	yes	down	_	_	_	_	_
c103632_g1	1291.00	75.00	63.367	2.208	-4.78	1.71e-04	1.30e-02	yes	down	_	_	_	_	_
c86767_g1	69.00	2.00	19.917	0.365	-5.43	1.77e-04	1.34e-02	yes	down	_	_	_	_	_
c108995_g1	45.00	0.00	1.735	0.000	-4.20	1.78e-04	1.34e-02	yes	down	_	_	_	_	_
c123538_g2	0.00	81.00	0.000	1.431	3.94	1.78e-04	1.34e-02	yes	up	_	_	_	_	PF07686.14|V-set|Immunoglobulin V-set domain|m.38196:87-182
c64358_g1	0.00	81.00	0.000	2.660	4.79	1.78e-04	1.34e-02	yes	up	_	_	_	_	_
c9432_g1	0.00	81.00	0.000	3.038	4.97	1.78e-04	1.34e-02	yes	up	_	_	_	_	_
c121242_g1	1075.00	63.00	37.952	1.330	-4.73	1.79e-04	1.34e-02	yes	down	Arylsulfatase B [Crassostrea gigas]	RecName: Full=Arylsulfatase I; Short=ASI; Flags: Precursor	_	_	PF00884.20|Sulfatase|Sulfatase|m.3873:1-225
c126693_g1	115.00	5.00	6.488	0.169	-4.61	1.79e-04	1.34e-02	yes	down	_	_	_	_	_
c111539_g1	92.00	3.00	5.022	0.101	-4.67	1.80e-04	1.34e-02	yes	down	_	_	_	_	_
c101004_g1	93427.00	5710.00	15258.960	575.065	-4.73	1.82e-04	1.36e-02	yes	down	anoxia-induced grl-like protein [Littorina littorea]	_	_	_	_
c100982_g1	7.00	494.00	0.819	35.259	5.27	1.84e-04	1.37e-02	yes	up	_	_	_	_	_
c108656_g1	91.00	3.00	3.495	0.081	-4.31	1.85e-04	1.37e-02	yes	down	PREDICTED: bifunctional ATP-dependent dihydroxyacetone kinase/FAD-AMP lyase (cyclizing)-like [Ciona intestinalis]	RecName: Full=Bifunctional ATP-dependent dihydroxyacetone kinase/FAD-AMP lyase (cyclizing); Includes: RecName: Full=ATP-dependent dihydroxyacetone kinase; Short=DHA k	_	E2.7.1.29, DAK1, DAK2	PF02733.14|Dak1|Dak1 domain|m.35165:1-263;PF02734.14|Dak2|DAK2 domain|m.35165:344-517
c115246_g1	44.00	0.00	5.364	0.000	-5.77	1.89e-04	1.37e-02	yes	down	_	_	_	_	_
c24990_g1	44.00	0.00	295.964	0.000	-11.53	1.89e-04	1.37e-02	yes	down	hypothetical protein [uncultured gamma proteobacterium HF0010_05D02]	_	_	_	_
c127633_g3	44.00	0.00	5.645	0.000	-5.84	1.89e-04	1.37e-02	yes	down	_	_	_	_	_
c107986_g1	44.00	0.00	1.772	0.000	-4.23	1.89e-04	1.37e-02	yes	down	_	_	_	_	PF07686.14|V-set|Immunoglobulin V-set domain|m.75311:174-268
c126290_g5	0.00	80.00	0.000	1.985	4.38	1.89e-04	1.37e-02	yes	up	Dynein heavy chain 5, axonemal [Crassostrea gigas]	RecName: Full=Dynein heavy chain 5, axonemal; AltName: Full=Axonemal beta dynein heavy chain 5; AltName: Full=Ciliary dynein heavy chain 5 [Homo sapiens]	annotation not available	DNAH	PF03028.12|Dynein_heavy|Dynein heavy chain and region D6 of dynein motor|m.21224:1-508
c86448_g1	0.00	80.00	0.000	3.065	4.98	1.89e-04	1.37e-02	yes	up	_	_	_	_	_
c32622_g1	0.00	80.00	0.000	2.363	4.62	1.89e-04	1.37e-02	yes	up	actin, putative [Eimeria mitis]	RecName: Full=Actin [Toxoplasma gondii]	actin; Actins are highly conserved proteins that are involved in various types of cell motil [...]	ACTF	PF00022.16|Actin|Actin|m.58990:4-403
c120508_g2	0.00	80.00	0.000	2.160	4.50	1.89e-04	1.37e-02	yes	up	_	_	_	_	_
c116202_g1	0.00	79.00	0.000	1.283	3.79	1.89e-04	1.37e-02	yes	up	_	_	_	_	_
c120125_g2	0.00	79.00	0.000	3.139	5.02	1.89e-04	1.37e-02	yes	up	_	_	_	_	_
c176529_g1	0.00	79.00	0.000	3.126	5.01	1.89e-04	1.37e-02	yes	up	_	_	_	_	_
c9795_g1	0.00	79.00	0.000	1.856	4.29	1.89e-04	1.37e-02	yes	up	_	_	_	_	_
c105906_g1	310.00	17.00	31.182	1.040	-4.78	1.93e-04	1.40e-02	yes	down	_	_	_	_	_
c106684_g1	67.00	2.00	5.608	0.101	-4.83	1.98e-04	1.43e-02	yes	down	_	_	_	_	_
c81339_g1	43.00	0.00	4.558	0.000	-5.54	1.99e-04	1.43e-02	yes	down	_	_	_	_	_
c111574_g5	43.00	0.00	4.851	0.000	-5.63	1.99e-04	1.43e-02	yes	down	_	_	_	_	_
c14818_g1	43.00	0.00	1.491	0.000	-3.99	1.99e-04	1.43e-02	yes	down	_	_	_	_	_
c108013_g2	0.00	78.00	0.000	4.982	5.67	1.99e-04	1.43e-02	yes	up	_	_	_	_	_
c127164_g2	0.00	78.00	0.000	4.327	5.47	1.99e-04	1.43e-02	yes	up	_	_	_	_	_
c123716_g1	39677.00	2504.00	1238.203	46.709	-4.73	2.03e-04	1.45e-02	yes	down	_	_	_	_	_
c130656_g1	2942.00	183.00	51.258	1.931	-4.66	2.03e-04	1.46e-02	yes	down	PREDICTED: oncoprotein-induced transcript 3 protein [Xenopus (Silurana) tropicalis]	_	_	_	PF00094.22|VWD|von Willebrand factor type D domain|m.28412:400-552
c105631_g3	605.00	36.00	75.414	2.741	-4.73	2.04e-04	1.46e-02	yes	down	_	_	_	_	_
c121036_g7	13.00	793.00	0.941	34.537	5.06	2.04e-04	1.46e-02	yes	up	_	_	_	_	_
c116065_g1	1.00	161.00	0.012	1.323	3.67	2.06e-04	1.47e-02	yes	up	Multidrug resistance-associated protein 1 [Crassostrea gigas]	_	_	ABCC1	PF00664.20|ABC_membrane|ABC transporter transmembrane region|m.37537:3-159;PF00664.20|ABC_membrane|ABC transporter transmembrane region|m.37537:535-804;PF00005.24|ABC_tran|ABC transporter|m.37537:221-355;PF00005.24|ABC_tran|ABC transporter|m.37537:874-1021
c104771_g1	1984.00	123.00	331.374	12.678	-4.70	2.08e-04	1.48e-02	yes	down	_	_	_	_	_
c78078_g1	174.00	8.00	23.142	0.655	-4.94	2.10e-04	1.49e-02	yes	down	hypothetical protein T265_02895 [Opisthorchis viverrini]	RecName: Full=40S ribosomal protein S7; AltName: Full=S8 [Rattus norvegicus]	SJCHGC02314 protein	RP-S7e, RPS7	PF01251.15|Ribosomal_S7e|Ribosomal protein S7e|m.75094:5-188
c97829_g2	0.00	77.00	0.000	5.684	5.85	2.11e-04	1.49e-02	yes	up	_	_	_	_	_
c104087_g3	0.00	76.00	0.000	2.545	4.73	2.11e-04	1.49e-02	yes	up	_	_	_	_	_
c86245_g1	0.00	76.00	0.000	7.075	6.16	2.11e-04	1.49e-02	yes	up	_	_	_	_	_
c101779_g1	0.00	76.00	0.000	1.823	4.27	2.11e-04	1.49e-02	yes	up	_	_	_	_	_
c126159_g1	214.00	11.00	13.477	0.365	-4.87	2.20e-04	1.54e-02	yes	down	pannexin 2 [Aplysia californica]	_	_	_	PF00876.15|Innexin|Innexin|m.36893:28-298
c104154_g1	1592.00	101.00	207.072	8.155	-4.65	2.22e-04	1.54e-02	yes	down	_	_	_	_	PF13202.3|EF-hand_5|EF hand|m.14910:64-85;PF00036.29|EF-hand_1|EF hand|m.14910:63-86
c26133_g1	234.00	13.00	13.074	0.439	-4.61	2.23e-04	1.54e-02	yes	down	hypothetical protein T265_02201 [Opisthorchis viverrini]	RecName: Full=60S ribosomal protein L4 [Mus musculus]	SJCHGC06667 protein	RP-L4e, RPL4	PF00573.19|Ribosomal_L4|Ribosomal protein L4/L1 family|m.63589:39-277;PF14374.3|Ribos_L4_asso_C|60S ribosomal protein L4 C-terminal domain|m.63589:290-362
c143918_g1	42.00	0.00	2.933	0.000	-4.92	2.24e-04	1.54e-02	yes	down	_	_	_	_	_
c104765_g1	42.00	0.00	1.320	0.000	-3.83	2.24e-04	1.54e-02	yes	down	_	_	_	_	_
c34317_g1	42.00	0.00	1.894	0.000	-4.32	2.24e-04	1.54e-02	yes	down	_	_	_	_	_
c105236_g3	42.00	0.00	2.847	0.000	-4.88	2.24e-04	1.54e-02	yes	down	PREDICTED: eukaryotic translation initiation factor 4 gamma 1-like [Danio rerio]	_	_	EIF4G	PF02854.16|MIF4G|MIF4G domain|m.69173:124-208
c28997_g1	42.00	0.00	2.077	0.000	-4.44	2.24e-04	1.54e-02	yes	down	hypothetical protein [Paramecium tetraurelia strain d4-2]	RecName: Full=Heat shock protein 81-2; Short=HSP81-2; AltName: Full=Heat shock protein 90 [Oryza sativa Japonica Group]	annotation not avaliable	htpG, HSP90A	_
c107014_g4	0.00	75.00	0.000	2.228	4.54	2.24e-04	1.54e-02	yes	up	_	_	_	_	_
c120772_g4	0.00	75.00	0.000	1.134	3.63	2.24e-04	1.54e-02	yes	up	_	_	_	_	_
c122275_g3	0.00	75.00	0.000	1.742	4.20	2.24e-04	1.54e-02	yes	up	_	_	_	_	_
c104839_g3	0.00	75.00	0.000	1.863	4.29	2.24e-04	1.54e-02	yes	up	hypothetical protein BRAFLDRAFT_81483 [Branchiostoma floridae]	RecName: Full=Receptor-type tyrosine-protein phosphatase gamma; Short=Protein-tyrosine phosphatase gamma; Short=R-PTP-gamma; Flags: Precursor [Mus musculus]	_	_	PF00102.24|Y_phosphatase|Protein-tyrosine phosphatase|m.8255:1-60;PF00102.24|Y_phosphatase|Protein-tyrosine phosphatase|m.8255:120-353
c100876_g2	0.00	75.00	0.000	2.889	4.90	2.24e-04	1.54e-02	yes	up	_	_	_	_	_
c119530_g1	5.00	348.00	0.134	5.617	4.61	2.30e-04	1.58e-02	yes	up	_	_	_	_	_
c107731_g1	41.00	0.00	8.138	0.000	-6.36	2.37e-04	1.61e-02	yes	down	lipid transfer protein 3 precursor [Gossypium hirsutum]	RecName: Full=Non-specific lipid-transfer protein; Short=LTP; AltName: Full=GH3; Flags: Precursor	RecName: Full=Non-specific lipid-transfer protein;; Plant non-specific lipid-transfer protei [...]	_	PF00234.19|Tryp_alpha_amyl|Protease inhibitor/seed storage/LTP family|m.21987:30-116;PF14368.3|LTP_2|Probable lipid transfer|m.21987:15-108
c115725_g1	41.00	0.00	3.287	0.000	-5.08	2.37e-04	1.61e-02	yes	down	_	_	_	_	_
c111098_g1	41.00	0.00	3.042	0.000	-4.97	2.37e-04	1.61e-02	yes	down	_	_	_	_	_
c127025_g1	41.00	0.00	1.955	0.000	-4.36	2.37e-04	1.61e-02	yes	down	_	_	_	_	_
c189198_g1	41.00	0.00	2.615	0.000	-4.76	2.37e-04	1.61e-02	yes	down	hypothetical protein HMPREF1120_11008 (mitochondrion) [Exophiala dermatitidis NIH/UT8656]	_	_	_	_
c116629_g3	41.00	0.00	3.556	0.000	-5.19	2.37e-04	1.61e-02	yes	down	_	_	_	_	PF09848.6|DUF2075|Uncharacterized conserved protein (DUF2075)|m.34564:129-224
c116585_g1	0.00	74.00	0.000	1.775	4.23	2.37e-04	1.61e-02	yes	up	_	_	_	_	_
c65861_g3	0.00	74.00	0.000	1.114	3.60	2.37e-04	1.61e-02	yes	up	PREDICTED: uncharacterized protein LOC101859645 [Aplysia californica]	RecName: Full=Phthiocerol synthesis polyketide synthase type I PpsA; AltName: Full=Beta-ketoacyl-acyl-carrier-protein synthase I [Mycobacterium tuberculosis H37Rv]	_	_	PF00698.18|Acyl_transf_1|Acyl transferase domain|m.47275:341-645;PF02801.19|Ketoacyl-synt_C|Beta-ketoacyl synthase, C-terminal domain|m.47275:77-189;PF00109.23|ketoacyl-synt|Beta-ketoacyl synthase, N-terminal domain|m.47275:1-64;PF16197.2|KAsynt_C_assoc|Ketoacyl-synthetase C-terminal extension|m.47275:194-306
c106177_g5	0.00	74.00	0.000	4.948	5.66	2.37e-04	1.61e-02	yes	up	_	_	_	_	_
c122499_g1	293.00	14974.00	7.930	242.778	4.92	2.38e-04	1.62e-02	yes	up	PREDICTED: cytochrome P450 3A41-like isoform X1 [Aplysia californica]	RecName: Full=Cytochrome P450 3A41 [Mus musculus]	_	CYP3A	PF00067.19|p450|Cytochrome P450|m.27910:43-504
c123150_g4	167.00	9.00	15.750	0.513	-4.69	2.40e-04	1.62e-02	yes	down	_	_	_	_	_
c88169_g1	9.00	568.00	0.281	10.713	4.83	2.40e-04	1.62e-02	yes	up	_	_	_	_	_
c119998_g1	143.00	7339.00	13.147	377.564	4.83	2.41e-04	1.62e-02	yes	up	C-type lectin A [Azumapecten farreri]	RecName: Full=Perlucin	_	MRC	PF00059.18|Lectin_C|Lectin C-type domain|m.1795:44-151
c160272_g1	146.00	7.00	46.456	1.411	-4.95	2.44e-04	1.64e-02	yes	down	large subunit ribosomal protein L35Ae [Clonorchis sinensis]	_	Putative uncharacterized protein	RP-L35Ae, RPL35A	PF01247.15|Ribosomal_L35Ae|Ribosomal protein L35Ae|m.65651:31-131
c122445_g5	1.00	153.00	0.049	2.707	4.24	2.45e-04	1.64e-02	yes	up	_	_	_	_	_
c121013_g3	3.00	228.00	0.464	21.886	5.28	2.45e-04	1.64e-02	yes	up	_	_	_	_	_
c100134_g1	125.00	6.00	12.194	0.371	-4.71	2.45e-04	1.64e-02	yes	down	_	_	_	_	_
c112236_g3	166.00	8.00	8.309	0.641	-3.50	2.47e-04	1.65e-02	yes	down	_	_	_	_	_
c105620_g1	40.00	0.00	2.920	0.000	-4.92	2.52e-04	1.66e-02	yes	down	_	_	_	_	_
c44210_g1	40.00	0.00	11.547	0.000	-6.86	2.52e-04	1.66e-02	yes	down	_	_	_	_	_
c69809_g1	40.00	0.00	2.639	0.000	-4.78	2.52e-04	1.66e-02	yes	down	_	_	_	_	_
c126086_g2	40.00	0.00	9.482	0.000	-6.58	2.52e-04	1.66e-02	yes	down	_	_	_	_	_
c89892_g1	40.00	0.00	5.804	0.000	-5.88	2.52e-04	1.66e-02	yes	down	_	_	_	_	_
c121638_g1	40.00	0.00	4.044	0.000	-5.37	2.52e-04	1.66e-02	yes	down	_	_	_	_	_
c110872_g1	40.00	0.00	1.833	0.000	-4.27	2.52e-04	1.66e-02	yes	down	PREDICTED: short-chain collagen C4-like [Amphimedon queenslandica]	_	_	_	_
c110494_g2	0.00	73.00	0.000	3.578	5.20	2.52e-04	1.66e-02	yes	up	_	_	_	_	_
c103108_g4	0.00	73.00	0.000	4.260	5.45	2.52e-04	1.66e-02	yes	up	_	_	_	_	_
c51266_g1	0.00	72.00	0.000	5.610	5.84	2.52e-04	1.66e-02	yes	up	_	_	_	_	_
c124375_g1	0.00	72.00	0.000	1.937	4.35	2.52e-04	1.66e-02	yes	up	PREDICTED: centrosomal protein of 44 kDa-like isoform X2 [Haplochromis burtoni]	RecName: Full=Deoxycytidylate deaminase; AltName: Full=dCMP deaminase [Pongo abelii]	_	comEB	PF00383.20|dCMP_cyt_deam_1|Cytidine and deoxycytidylate deaminase zinc-binding region|m.28575:45-157;PF00383.20|dCMP_cyt_deam_1|Cytidine and deoxycytidylate deaminase zinc-binding region|m.28575:224-335;PF14437.3|MafB19-deam|MafB19-like deaminase|m.28575:45-159;PF14437.3|MafB19-deam|MafB19-like deaminase|m.28575:224-337
c37381_g1	124.00	6.00	9.971	0.297	-4.66	2.55e-04	1.67e-02	yes	down	_	_	_	_	_
c89095_g1	62.00	2.00	2.749	0.054	-4.21	2.59e-04	1.69e-02	yes	down	succinyl-CoA synthetase beta subunit [Clonorchis sinensis]	RecName: Full=Succinyl-CoA ligase [GDP-forming]	SJCHGC05155 protein	LSC2	PF08442.7|ATP-grasp_2|ATP-grasp domain|m.14520:35-243;PF00549.16|Ligase_CoA|CoA-ligase|m.14520:316-436
c126194_g1	1255.00	83.00	44.525	1.708	-4.63	2.64e-04	1.73e-02	yes	down	_	_	_	_	_
c128568_g1	1194.00	79.00	25.562	0.979	-4.57	2.65e-04	1.73e-02	yes	down	hypothetical protein LOTGIDRAFT_230584 [Lottia gigantea]	_	_	_	PF00144.21|Beta-lactamase|Beta-lactamase|m.28364:45-376
c125670_g1	8.00	477.00	0.318	7.757	4.23	2.68e-04	1.74e-02	yes	up	PREDICTED: short-chain collagen C4-like [Amphimedon queenslandica]	_	_	_	_
c156050_g1	0.00	71.00	0.000	1.634	4.12	2.68e-04	1.74e-02	yes	up	Protein CLEC-199, isoform e [Caenorhabditis elegans]	RecName: Full=Probable serine/threonine-protein kinase fhkB; AltName: Full=Forkhead-associated kinase protein B [Dictyostelium discoideum]	_	_	_
c112138_g1	0.00	71.00	0.000	1.688	4.16	2.68e-04	1.74e-02	yes	up	_	_	_	_	_
c114321_g1	7745.00	529.00	292.005	11.942	-4.60	2.68e-04	1.74e-02	yes	down	_	_	_	_	_
c120022_g2	9.00	547.00	0.868	7.736	3.02	2.74e-04	1.77e-02	yes	up	_	_	_	_	_
c95163_g1	101.00	4.00	28.225	0.702	-5.14	2.77e-04	1.79e-02	yes	down	MF6p protein, partial [Fasciola hepatica]	_	_	_	_
c68021_g1	180.00	10.00	48.753	1.708	-4.76	2.78e-04	1.79e-02	yes	down	putative ribosomal protein S24 isoform 3 [Schistosoma japonicum]	RecName: Full=40S ribosomal protein S24 [Takifugu rubripes]	40S ribosomal protein S24	RP-S24e, RPS24	PF01282.16|Ribosomal_S24e|Ribosomal protein S24e|m.18558:24-97
c124694_g1	160.00	8.00	5.535	0.169	-4.39	2.79e-04	1.80e-02	yes	down	hypothetical protein LOTGIDRAFT_160181 [Lottia gigantea]	_	_	_	PF00092.25|VWA|von Willebrand factor type A domain|m.34725:367-540;PF13519.3|VWA_2|von Willebrand factor type A domain|m.34725:368-482
c121566_g2	453.00	29.00	35.752	1.296	-4.68	2.80e-04	1.80e-02	yes	down	PREDICTED: low-density lipoprotein receptor-related protein 4-like [Aplysia californica]	_	_	LDLR	PF00058.14|Ldl_recept_b|Low-density lipoprotein receptor repeat class B|m.58890:127-165;PF00058.14|Ldl_recept_b|Low-density lipoprotein receptor repeat class B|m.58890:171-209
c121084_g4	100.00	4.00	14.174	0.351	-4.98	2.84e-04	1.81e-02	yes	down	_	_	_	_	_
c84303_g1	80.00	3.00	2.969	0.068	-4.19	2.85e-04	1.81e-02	yes	down	protein disulphide isomerase [Fasciola hepatica]	RecName: Full=Protein disulfide-isomerase; Short=PDI; AltName: Full=Cellular thyroid hormone-binding protein; AltName: Full=Prolyl 4-hydroxylase subunit beta; AltNam	_	PDIA1, P4HB	PF00085.17|Thioredoxin|Thioredoxin|m.59031:45-147;PF00085.17|Thioredoxin|Thioredoxin|m.59031:384-486;PF13848.3|Thioredoxin_6|Thioredoxin-like domain|m.59031:195-360;PF00578.18|AhpC-TSA|AhpC/TSA family|m.59031:59-119
c128630_g1	39.00	0.00	8.749	0.000	-6.47	2.85e-04	1.81e-02	yes	down	_	_	_	_	_
c94774_g1	39.00	0.00	2.285	0.000	-4.58	2.85e-04	1.81e-02	yes	down	hypothetical protein T265_00819 [Opisthorchis viverrini]	RecName: Full=Annexin A7; AltName: Full=Annexin VII; AltName: Full=Annexin-7; AltName: Full=Synexin [Bos taurus]	Clone ZZZ79 mRNA sequence	ANXA7_11	PF00191.17|Annexin|Annexin|m.28193:76-140;PF00191.17|Annexin|Annexin|m.28193:147-212;PF00191.17|Annexin|Annexin|m.28193:230-296;PF00191.17|Annexin|Annexin|m.28193:306-371
c108485_g6	39.00	0.00	3.763	0.000	-5.27	2.85e-04	1.81e-02	yes	down	_	_	_	_	_
c96600_g2	39.00	0.00	3.678	0.000	-5.24	2.85e-04	1.81e-02	yes	down	elongation factor 1 alpha [Dictyostelium discoideum]	RecName: Full=Elongation factor 1-alpha; Short=EF-1-alpha; AltName: Full=50 kDa actin-binding protein; AltName: Full=ABP-50 [Dictyostelium 55054074	elongation factor 1 alpha	EEF1A	_
c116083_g1	39.00	0.00	46.920	0.000	-8.88	2.85e-04	1.81e-02	yes	down	PREDICTED: actin, alpha skeletal muscle [Tupaia chinensis]	_	_	ACTB_G1	PF00022.16|Actin|Actin|m.41301:2-119
c117522_g4	0.00	70.00	0.000	11.821	6.90	2.85e-04	1.81e-02	yes	up	PREDICTED: poly [ADP-ribose]	_	_	PARP10_14_15	PF00644.17|PARP|Poly(ADP-ribose) polymerase catalytic domain|m.18772:74-155
c114263_g2	0.00	70.00	0.000	2.464	4.68	2.85e-04	1.81e-02	yes	up	_	_	_	_	_
c117746_g1	22.00	1139.00	3.189	101.383	4.95	2.91e-04	1.84e-02	yes	up	_	_	_	_	_
c129891_g1	1063.00	72.00	15.701	0.628	-4.44	2.93e-04	1.85e-02	yes	down	hypothetical protein LOTGIDRAFT_238559 [Lottia gigantea]	RecName: Full=Aminopeptidase N; Short=AP-N; Short=pAPN; AltName: Full=Alanyl aminopeptidase; AltName: Full=Aminopeptidase M; Short=AP-M; AltName: Full=Microsomal ami	_	ANPEP	PF01433.17|Peptidase_M1|Peptidase family M1|m.18878:131-531;PF01433.17|Peptidase_M1|Peptidase family M1|m.18878:1007-1297;PF11838.5|ERAP1_C|ERAP1-like C-terminal domain|m.18878:677-956
c101182_g1	3628.00	254.00	234.271	9.883	-4.55	2.96e-04	1.86e-02	yes	down	_	_	_	_	_
c128671_g3	6.00	357.00	0.134	4.638	4.34	2.98e-04	1.86e-02	yes	up	hypothetical protein LOTGIDRAFT_231750 [Lottia gigantea]	_	_	_	_
c123364_g1	99.00	5.00	5.376	0.162	-4.39	2.99e-04	1.86e-02	yes	down	_	_	_	_	_
c32150_g1	38.00	0.00	3.311	0.000	-5.09	3.04e-04	1.86e-02	yes	down	hypothetical protein LOTGIDRAFT_238744 [Lottia gigantea]	_	_	_	_
c56077_g1	38.00	0.00	3.934	0.000	-5.33	3.04e-04	1.86e-02	yes	down	_	_	_	_	_
c165067_g1	38.00	0.00	1.564	0.000	-4.06	3.04e-04	1.86e-02	yes	down	_	_	_	_	_
c98961_g1	38.00	0.00	3.372	0.000	-5.12	3.04e-04	1.86e-02	yes	down	_	_	_	_	_
c92809_g1	38.00	0.00	4.936	0.000	-5.65	3.04e-04	1.86e-02	yes	down	glycine-rich RNA-binding protein [Gossypium hirsutum]	_	RNA recognition motif containing protein, expressed	_	PF00076.19|RRM_1|RNA recognition motif. (a.k.a. RRM, RBD, or RNP domain)|m.68182:11-79
c2599_g1	38.00	0.00	1.894	0.000	-4.32	3.04e-04	1.86e-02	yes	down	hypothetical protein BRAFLDRAFT_63704 [Branchiostoma floridae]	_	_	_	_
c122776_g2	0.00	69.00	0.000	3.780	5.28	3.04e-04	1.86e-02	yes	up	deoxyribonuclease II [Tetrahymena thermophila SB210]	_	_	DNASE2	_
c89772_g1	0.00	69.00	0.000	2.876	4.90	3.04e-04	1.86e-02	yes	up	ferritin 1 [Eriocheir sinensis]	_	_	_	_
c122978_g1	0.00	69.00	0.000	6.285	6.00	3.04e-04	1.86e-02	yes	up	_	_	_	_	_
c142848_g1	0.00	69.00	0.000	1.708	4.18	3.04e-04	1.86e-02	yes	up	_	_	_	_	_
c31906_g1	0.00	69.00	0.000	2.262	4.56	3.04e-04	1.86e-02	yes	up	hypothetical protein M514_24925 [Trichuris suis]	_	_	_	_
c100888_g1	0.00	69.00	0.000	3.531	5.18	3.04e-04	1.86e-02	yes	up	_	_	_	_	_
c94249_g1	0.00	69.00	0.000	2.464	4.68	3.04e-04	1.86e-02	yes	up	_	_	_	_	_
c90399_g1	0.00	68.00	0.000	1.937	4.35	3.04e-04	1.86e-02	yes	up	_	_	_	_	_
c91428_g2	0.00	68.00	0.000	2.255	4.56	3.04e-04	1.86e-02	yes	up	_	_	_	_	_
c129468_g1	0.00	68.00	0.000	3.099	5.00	3.04e-04	1.86e-02	yes	up	_	_	_	_	_
c108342_g3	0.00	68.00	0.000	11.807	6.90	3.04e-04	1.86e-02	yes	up	_	_	_	_	_
c63288_g1	0.00	68.00	0.000	3.119	5.01	3.04e-04	1.86e-02	yes	up	_	_	_	_	_
c109188_g2	59.00	2.00	2.933	0.061	-4.24	3.05e-04	1.86e-02	yes	down	_	_	_	_	_
c68650_g1	213.00	12.00	23.949	0.824	-4.70	3.05e-04	1.86e-02	yes	down	60S ribosomal protein L10, putative [Schistosoma mansoni]	_	SJCHGC06675 protein	RP-L10e, RPL10	PF00252.15|Ribosomal_L16|Ribosomal protein L16p/L10e|m.68402:12-165
c119034_g2	61901.00	4419.00	2288.152	108.606	-4.40	3.07e-04	1.87e-02	yes	down	_	_	_	_	PF04089.11|BRICHOS|BRICHOS domain|m.7657:69-156
c119658_g1	193.00	11.00	32.221	1.107	-4.74	3.09e-04	1.88e-02	yes	down	hypothetical protein BRAFLDRAFT_66392 [Branchiostoma floridae]	_	_	_	_
c115889_g1	155.00	9.00	112.059	0.331	-8.02	3.11e-04	1.89e-02	yes	down	_	_	_	_	PF07686.14|V-set|Immunoglobulin V-set domain|m.33551:40-130
c111237_g1	722.00	49.00	21.542	0.871	-4.48	3.12e-04	1.90e-02	yes	down	heat shock protein 70 [Echinostoma caproni]	RecName: Full=Heat shock cognate 71 kDa protein; AltName: Full=Heat shock 70 kDa protein 8 [Bos taurus]	heat shock 70kDa protein 8	HSPA1_8	PF00012.17|HSP70|Hsp70 protein|m.75024:9-615;PF06723.10|MreB_Mbl|MreB/Mbl protein|m.75024:142-377;PF10712.6|NAD-GH|NAD-specific glutamate dehydrogenase|m.75025:3-204;PF10712.6|NAD-GH|NAD-specific glutamate dehydrogenase|m.75026:38-201
c80924_g1	249.00	15.00	8.113	0.290	-4.40	3.13e-04	1.90e-02	yes	down	_	_	_	_	PF00084.17|Sushi|Sushi repeat (SCR repeat)|m.55954:177-237
c57052_g1	3.00	212.00	0.134	5.549	4.59	3.14e-04	1.90e-02	yes	up	hypothetical protein [Acidiphilium cryptum]	_	_	_	_
c109431_g1	116.00	6.00	3.690	0.115	-4.14	3.14e-04	1.90e-02	yes	down	endo-1,3(4)-beta-glucanase, putative [Cordyceps militaris CM01]	RecName: Full=Uncharacterized protein YMR317W [Saccharomyces cerevisiae S288c]	_	_	_
c63620_g1	10274.00	743.00	1900.388	85.161	-4.48	3.24e-04	1.93e-02	yes	down	_	_	_	_	_
c103987_g2	37.00	0.00	4.167	0.000	-5.42	3.24e-04	1.93e-02	yes	down	_	_	_	_	_
c78834_g1	37.00	0.00	5.682	0.000	-5.85	3.24e-04	1.93e-02	yes	down	_	_	_	_	_
c94648_g1	37.00	0.00	1.698	0.000	-4.17	3.24e-04	1.93e-02	yes	down	dyskeratosis congenita 1, dyskerin [Schistosoma japonicum]	_	small nucleolar RNA, H/ACA box 56	DKC1, NOLA4, CBF5	PF08068.9|DKCLD|DKCLD (NUC011) domain|m.69994:47-103;PF16198.2|TruB_C_2|tRNA pseudouridylate synthase B C-terminal domain|m.69994:224-290;PF01509.15|TruB_N|TruB family pseudouridylate synthase (N terminal domain)|m.69994:107-223;PF01472.17|PUA|PUA domain|m.69994:294-367
c84158_g4	37.00	0.00	1.869	0.000	-4.30	3.24e-04	1.93e-02	yes	down	_	_	_	_	_
c126953_g4	37.00	0.00	1.625	0.000	-4.11	3.24e-04	1.93e-02	yes	down	unnamed protein product [Oncorhynchus mykiss]	RecName: Full=Uncharacterized protein U88	_	_	_
c109044_g2	0.00	67.00	0.000	3.139	5.02	3.24e-04	1.93e-02	yes	up	_	_	_	_	_
c104480_g1	0.00	67.00	0.000	1.789	4.24	3.24e-04	1.93e-02	yes	up	_	_	_	_	_
c85760_g1	0.00	67.00	0.000	1.580	4.07	3.24e-04	1.93e-02	yes	up	_	_	_	_	_
c81802_g4	0.00	67.00	0.000	4.597	5.55	3.24e-04	1.93e-02	yes	up	_	_	_	_	_
c69103_g1	0.00	67.00	0.000	1.910	4.33	3.24e-04	1.93e-02	yes	up	_	_	_	_	_
c120918_g1	767.00	53.00	38.966	1.667	-4.47	3.28e-04	1.95e-02	yes	down	_	_	_	_	_
c105695_g1	1564.00	112.00	130.582	5.657	-4.50	3.30e-04	1.96e-02	yes	down	Peptidoglycan recognition protein [Crassostrea gigas]	_	_	E3.5.1.28	_
c127891_g4	96.00	5.00	4.081	0.081	-4.53	3.30e-04	1.96e-02	yes	down	_	_	_	_	_
c71599_g1	152.00	9.00	46.419	1.742	-4.66	3.32e-04	1.97e-02	yes	down	hypothetical protein T265_05779 [Opisthorchis viverrini]	RecName: Full=60S acidic ribosomal protein P1; AltName: Full=L12 [Zea mays]	hypothetical protein	RP-LP1, RPLP1	PF00428.16|Ribosomal_60s|60s Acidic ribosomal protein|m.33530:43-134
c80856_g1	151.00	8.00	14.272	0.459	-4.68	3.38e-04	1.99e-02	yes	down	calcium-binding protein [Fasciola hepatica]	RecName: Full=Tegument antigen; AltName: Full=A12; AltName: Full=Antigen SmA22.6; AltName: Full=I(H)A [Schistosoma mansoni]	_	_	PF01221.15|Dynein_light|Dynein light chain type 1|m.59789:115-202;PF13499.3|EF-hand_7|EF-hand domain pair|m.59789:28-84;PF13202.3|EF-hand_5|EF hand|m.59789:28-51;PF13202.3|EF-hand_5|EF hand|m.59789:67-82;PF10591.6|SPARC_Ca_bdg|Secreted protein acidic and rich in cysteine Ca binding region|m.59789:22-84;PF13833.3|EF-hand_8|EF-hand domain pair|m.59789:41-84
c127283_g2	594.00	41.00	15.139	0.621	-4.40	3.38e-04	1.99e-02	yes	down	Aminopeptidase N [Crassostrea gigas]	RecName: Full=Probable aminopeptidase 1 [Sulfolobus solfataricus P2]	_	ENPEP	PF11838.5|ERAP1_C|ERAP1-like C-terminal domain|m.17335:275-540;PF01433.17|Peptidase_M1|Peptidase family M1|m.17335:1-129
c125442_g1	981.00	69.00	51.282	2.160	-4.51	3.39e-04	1.99e-02	yes	down	_	_	_	_	_
c128594_g1	122.00	5670.00	2.688	72.827	4.71	3.41e-04	2.01e-02	yes	up	_	_	_	_	_
c96249_g1	150.00	8.00	13.966	0.452	-4.67	3.43e-04	2.02e-02	yes	down	hypothetical protein T265_03112 [Opisthorchis viverrini]	RecName: Full=40S ribosomal protein S4	SJCHGC06323 protein	RP-S4e, RPS4	PF00900.17|Ribosomal_S4e|Ribosomal family S4e|m.74949:105-179;PF16121.2|40S_S4_C|40S ribosomal protein S4 C-terminus|m.74949:222-268;PF08071.9|RS4NT|RS4NT (NUC023) domain|m.74949:13-49;PF01479.22|S4|S4 domain|m.74949:54-100;PF00467.26|KOW|KOW motif|m.74949:187-220
c85832_g1	33873.00	2502.00	4505.471	203.759	-4.47	3.44e-04	2.02e-02	yes	down	SARP-19 precursor [Littorina littorea]	_	_	_	PF13202.3|EF-hand_5|EF hand|m.76838:132-146
c90588_g1	0.00	66.00	0.000	2.430	4.66	3.46e-04	2.02e-02	yes	up	Tenascin-X [Crassostrea gigas]	_	_	_	_
c90049_g1	0.00	66.00	0.000	3.733	5.26	3.46e-04	2.02e-02	yes	up	_	_	_	_	_
c123801_g1	0.00	66.00	0.000	2.235	4.55	3.46e-04	2.02e-02	yes	up	_	_	_	_	_
c99231_g1	0.00	66.00	0.000	2.633	4.77	3.46e-04	2.02e-02	yes	up	_	_	_	_	_
c26412_g1	94.00	4.00	5.437	0.142	-4.52	3.48e-04	2.03e-02	yes	down	Splicing factor arginine:serine rich 4 [Echinococcus granulosus]	RecName: Full=Serine/arginine-rich splicing factor 4; AltName: Full=Pre-mRNA-splicing factor SRP75; AltName: Full=SRP001LB; AltName: Full=Splicing factor, arginine	splicing factor, arginine/serine-rich 4	SFRS4_5_6	PF00076.19|RRM_1|RNA recognition motif. (a.k.a. RRM, RBD, or RNP domain)|m.25000:9-70;PF00076.19|RRM_1|RNA recognition motif. (a.k.a. RRM, RBD, or RNP domain)|m.25000:105-170
c108170_g1	113.00	6.00	4.264	0.135	-4.21	3.49e-04	2.03e-02	yes	down	hypothetical protein T265_01732 [Opisthorchis viverrini]	RecName: Full=ATP synthase subunit beta, mitochondrial; Flags: Precursor [Cyprinus carpio]	mitochondrial ATP synthase beta subunit-like ; Produces ATP from ADP in the presence of a pr [...]	ATPeF1B, ATP5B, ATP2	PF00006.22|ATP-synt_ab|ATP synthase alpha/beta family, nucleotide-binding domain|m.49591:180-399;PF02874.20|ATP-synt_ab_N|ATP synthase alpha/beta family, beta-barrel domain|m.49591:57-123
c89573_g1	186.00	11.00	16.960	0.608	-4.59	3.52e-04	2.04e-02	yes	down	hypothetical protein T265_01644 [Opisthorchis viverrini]	RecName: Full=60S ribosomal protein L7 [Drosophila melanogaster]	Clone ZZD126 mRNA sequence	RP-L7e, RPL7	PF00327.17|Ribosomal_L30|Ribosomal protein L30p/L7e|m.56967:118-168;PF08079.9|Ribosomal_L30_N|Ribosomal L30 N-terminal domain|m.56967:43-113
c108536_g1	186.00	11.00	18.023	0.493	-4.93	3.52e-04	2.04e-02	yes	down	_	_	_	_	_
c95989_g1	75.00	3.00	10.520	0.257	-4.89	3.55e-04	2.06e-02	yes	down	SJCHGC09296 protein [Schistosoma Ribosomal protein L17 [Schistosoma japonicum]	RecName: Full=60S ribosomal protein L17	SJCHGC09296 protein	RP-L17e, RPL17	PF00237.16|Ribosomal_L22|Ribosomal protein L22p/L17e|m.13501:23-155
c104003_g1	75.00	3.00	15.982	0.398	-5.01	3.55e-04	2.06e-02	yes	down	_	_	_	_	_
c123234_g1	112.00	6.00	10.643	0.344	-4.60	3.57e-04	2.06e-02	yes	down	_	_	_	_	_
c105210_g1	3319.00	246.00	126.171	5.596	-4.47	3.58e-04	2.07e-02	yes	down	PREDICTED: cornifelin homolog [Aplysia californica]	_	_	_	PF04749.14|PLAC8|PLAC8 family|m.5987:23-107
c121424_g1	93.00	4.00	4.790	0.115	-4.51	3.67e-04	2.08e-02	yes	down	_	_	_	_	_
c112474_g1	93.00	5.00	3.177	0.101	-4.03	3.67e-04	2.08e-02	yes	down	_	_	_	_	_
c113293_g1	93.00	5.00	6.647	0.243	-4.30	3.67e-04	2.08e-02	yes	down	_	_	_	_	_
c108537_g1	74.00	3.00	3.128	0.074	-4.21	3.67e-04	2.08e-02	yes	down	Carbohydrate sulfotransferase 11 [Crassostrea gigas]	_	_	CHST11	PF03567.11|Sulfotransfer_2|Sulfotransferase family|m.43765:113-282
c124679_g1	36.00	0.00	8.834	0.000	-6.48	3.70e-04	2.08e-02	yes	down	_	_	_	_	_
c104013_g1	36.00	0.00	2.859	0.000	-4.89	3.70e-04	2.08e-02	yes	down	E6-4 [Gossypium hirsutum]	RecName: Full=Protein E6	_	_	_
c93695_g2	36.00	0.00	20.210	0.000	-7.67	3.70e-04	2.08e-02	yes	down	_	_	_	_	_
c100820_g2	36.00	0.00	5.450	0.000	-5.79	3.70e-04	2.08e-02	yes	down	_	_	_	_	_
c103723_g6	0.00	65.00	0.000	2.417	4.65	3.70e-04	2.08e-02	yes	up	hypothetical protein LOTGIDRAFT_232244 [Lottia gigantea]	_	_	_	_
c98854_g1	0.00	65.00	0.000	0.905	3.33	3.70e-04	2.08e-02	yes	up	_	_	_	_	_
c92092_g1	0.00	65.00	0.000	1.161	3.66	3.70e-04	2.08e-02	yes	up	_	_	_	_	_
c48989_g1	0.00	65.00	0.000	2.815	4.87	3.70e-04	2.08e-02	yes	up	_	_	_	_	_
c103514_g1	0.00	65.00	0.000	1.681	4.15	3.70e-04	2.08e-02	yes	up	_	_	_	_	_
c107078_g3	0.00	65.00	0.000	2.937	4.92	3.70e-04	2.08e-02	yes	up	_	_	_	_	_
c84554_g3	0.00	64.00	0.000	1.640	4.12	3.70e-04	2.08e-02	yes	up	_	_	_	_	_
c103723_g4	0.00	64.00	0.000	2.045	4.42	3.70e-04	2.08e-02	yes	up	hypothetical protein LOTGIDRAFT_232244 [Lottia gigantea]	_	_	_	_
c48307_g2	0.00	64.00	0.000	3.936	5.33	3.70e-04	2.08e-02	yes	up	_	_	_	_	_
c109503_g2	0.00	64.00	0.000	14.730	7.21	3.70e-04	2.08e-02	yes	up	_	_	_	_	_
c113785_g1	0.00	64.00	0.000	1.343	3.85	3.70e-04	2.08e-02	yes	up	_	_	_	_	_
c84744_g1	0.00	64.00	0.000	3.774	5.28	3.70e-04	2.08e-02	yes	up	_	_	_	_	_
c128601_g1	4787.00	359.00	111.057	4.773	-4.51	3.72e-04	2.08e-02	yes	down	PREDICTED: tenascin-R-like [Amphimedon queenslandica]	RecName: Full=Ficolin-2; AltName: Full=Collagen/fibrinogen domain-containing protein 2; AltName: Full=Ficolin-B; AltName: Full=Ficolin-beta; AltName: Full=L-ficolin	_	_	PF00147.15|Fibrinogen_C|Fibrinogen beta and gamma chains, C-terminal globular domain|m.13277:616-809
c124547_g1	1.00	134.00	0.024	1.499	3.69	3.80e-04	2.12e-02	yes	up	_	_	_	_	PF00791.17|ZU5|ZU5 domain|m.50856:460-554
c95621_g1	181.00	11.00	13.893	0.513	-4.51	3.82e-04	2.13e-02	yes	down	hypothetical protein T265_13051, partial [Opisthorchis viverrini]	RecName: Full=60S ribosomal protein L5-A	Clone ZZD1555 mRNA sequence	RP-L5e, RPL5	PF17144.1|Ribosomal_L5e|Ribosomal large subunit proteins 60S L5, and 50S L18|m.2770:22-183;PF14204.3|Ribosomal_L18_c|Ribosomal L18 C-terminal region|m.2770:201-291
c74398_g2	3.00	198.00	0.037	1.559	3.60	3.90e-04	2.15e-02	yes	up	_	_	_	_	_
c72594_g1	32.00	1496.00	5.596	161.816	4.83	3.91e-04	2.15e-02	yes	up	developmentally-regulated vdg3 [Haliotis asinina]	_	_	_	_
c112693_g2	304.00	21.00	21.859	0.938	-4.40	3.91e-04	2.15e-02	yes	down	_	_	_	_	_
c96606_g1	73.00	3.00	1.698	0.041	-3.67	3.93e-04	2.15e-02	yes	down	hypothetical protein T265_07708 [Opisthorchis viverrini]	_	SJCHGC06953 protein	_	PF07690.13|MFS_1|Major Facilitator Superfamily|m.72131:36-283;PF07690.13|MFS_1|Major Facilitator Superfamily|m.72131:276-458
c103384_g2	54.00	2.00	2.285	0.034	-4.15	3.95e-04	2.15e-02	yes	down	_	_	_	_	PF13424.3|TPR_12|Tetratricopeptide repeat|m.16110:389-460;PF13374.3|TPR_10|Tetratricopeptide repeat|m.16110:390-422;PF13181.3|TPR_8|Tetratricopeptide repeat|m.16110:260-289;PF13181.3|TPR_8|Tetratricopeptide repeat|m.16110:391-420
c126158_g4	54.00	2.00	50.830	1.222	-5.27	3.95e-04	2.15e-02	yes	down	_	_	_	_	_
c108728_g1	54.00	2.00	4.069	0.088	-4.47	3.95e-04	2.15e-02	yes	down	_	_	_	_	_
c103785_g2	54.00	2.00	3.250	0.074	-4.27	3.95e-04	2.15e-02	yes	down	PREDICTED: sphingosine 1-phosphate receptor 5 [Trichechus manatus latirostris]	RecName: Full=D(4) dopamine receptor; AltName: Full=D(2C) dopamine receptor; AltName: Full=Dopamine D4 receptor [Mus musculus]	_	S1PR5, EDG8	PF00001.18|7tm_1|7 transmembrane receptor (rhodopsin family)|m.47759:45-299;PF10320.6|7TM_GPCR_Srsx|Serpentine type 7TM GPCR chemoreceptor Srsx|m.47759:42-312;PF13853.3|7tm_4|Olfactory receptor|m.47759:37-308
c124276_g1	1377.00	103.00	63.782	2.849	-4.44	3.95e-04	2.15e-02	yes	down	PREDICTED: von Willebrand factor C domain-containing protein 2-like [Aplysia californica]	RecName: Full=von Willebrand factor C domain-containing protein 2-like; Flags: Precursor	_	_	_
c109775_g5	35.00	0.00	14.895	0.000	-7.23	3.96e-04	2.15e-02	yes	down	_	_	_	_	_
c163477_g1	35.00	0.00	1.197	0.000	-3.70	3.96e-04	2.15e-02	yes	down	aspartic-type endopeptidase [Moniliophthora roreri MCA 2997]	_	aspartic peptidase A1	_	PF00026.20|Asp|Eukaryotic aspartyl protease|m.50059:228-547;PF14543.3|TAXi_N|Xylanase inhibitor N-terminal|m.50059:228-347
c109633_g1	35.00	0.00	5.523	0.000	-5.81	3.96e-04	2.15e-02	yes	down	_	_	_	_	_
c65755_g1	35.00	0.00	3.152	0.000	-5.02	3.96e-04	2.15e-02	yes	down	_	_	_	_	_
c80745_g1	35.00	0.00	43.242	0.000	-8.76	3.96e-04	2.15e-02	yes	down	PREDICTED: basement membrane-specific heparan sulfate proteoglycan core protein-like [Aplysia californica]	RecName: Full=Low-density lipoprotein receptor-related protein 1B; Short=LRP-1B; AltName: Full=Low-density lipoprotein receptor-related protein-deleted in tumor; S	_	_	PF00057.15|Ldl_recept_a|Low-density lipoprotein receptor domain class A|m.62145:13-45;PF00057.15|Ldl_recept_a|Low-density lipoprotein receptor domain class A|m.62145:49-84
c112769_g2	35.00	0.00	2.639	0.000	-4.78	3.96e-04	2.15e-02	yes	down	_	_	_	_	_
c120325_g2	35.00	0.00	1.869	0.000	-4.30	3.96e-04	2.15e-02	yes	down	_	_	_	_	_
c120439_g3	35.00	0.00	2.175	0.000	-4.51	3.96e-04	2.15e-02	yes	down	_	_	_	_	_
c129853_g3	35.00	0.00	3.067	0.000	-4.99	3.96e-04	2.15e-02	yes	down	_	_	_	_	_
c108154_g1	0.00	63.00	0.000	9.930	6.65	3.96e-04	2.15e-02	yes	up	_	_	_	_	_
c104737_g1	0.00	63.00	0.000	2.781	4.85	3.96e-04	2.15e-02	yes	up	_	_	_	_	_
c156968_g1	0.00	63.00	0.000	1.559	4.05	3.96e-04	2.15e-02	yes	up	_	_	_	_	_
c113642_g1	3.00	197.00	0.122	4.678	4.43	3.99e-04	2.16e-02	yes	up	hypothetical protein AOL_s00169g79 [Arthrobotrys oligospora ATCC 24927]	_	_	_	_
c128076_g1	1775.00	134.00	31.781	1.431	-4.38	3.99e-04	2.16e-02	yes	down	_	_	_	_	PF00452.16|Bcl-2|Apoptosis regulator proteins, Bcl-2 family|m.60533:82-164
c106657_g2	6.00	326.00	0.061	2.039	3.73	4.04e-04	2.18e-02	yes	up	PREDICTED: sterile alpha motif domain-containing protein 9-like isoform X1 [Aplysia californica]	_	_	_	_
c115394_g1	6.00	326.00	0.086	2.653	3.89	4.04e-04	2.18e-02	yes	up	hypothetical protein CAPTEDRAFT_192917 [Capitella teleta]	RecName: Full=E3 ubiquitin-protein ligase RNF213 [Mus musculus]	_	_	_
c123657_g1	1.00	131.00	0.098	6.596	5.08	4.06e-04	2.19e-02	yes	up	_	_	_	_	_
c122263_g1	1.00	131.00	0.037	2.606	4.30	4.06e-04	2.19e-02	yes	up	_	_	_	_	_
c114985_g2	16.00	772.00	0.538	14.642	4.53	4.11e-04	2.21e-02	yes	up	_	_	_	_	_
c119287_g2	4.00	259.00	0.305	11.908	4.89	4.13e-04	2.22e-02	yes	up	_	_	_	_	_
c112841_g1	957.00	72.00	119.879	5.509	-4.42	4.16e-04	2.23e-02	yes	down	_	_	_	_	_
c127426_g1	11731.00	916.00	461.589	28.677	-4.00	4.18e-04	2.24e-02	yes	down	_	_	_	_	_
c93337_g1	89.00	5.00	1.466	0.047	-3.41	4.20e-04	2.24e-02	yes	down	collagen alpha-2(I) chain [Clonorchis sinensis]	_	_	COL3A	PF01391.15|Collagen|Collagen triple helix repeat (20 copies)|m.40608:2-60;PF01391.15|Collagen|Collagen triple helix repeat (20 copies)|m.40608:59-114;PF01391.15|Collagen|Collagen triple helix repeat (20 copies)|m.40608:409-466;PF01391.15|Collagen|Collagen triple helix repeat (20 copies)|m.40608:483-541;PF01391.15|Collagen|Collagen triple helix repeat (20 copies)|m.40608:627-682;PF01410.15|COLFI|F…
c108391_g1	211.00	14.00	7.343	0.290	-4.25	4.21e-04	2.24e-02	yes	down	PREDICTED: uncharacterized protein LOC101846901 [Aplysia californica]	RecName: Full=Acidic mammalian chitinase; Short=AMCase; AltName: Full=YNL; Flags: Precursor [Mus musculus]	_	E3.2.1.14	PF00704.25|Glyco_hydro_18|Glycosyl hydrolases family 18|m.1999:119-466;PF01607.21|CBM_14|Chitin binding Peritrophin-A domain|m.1999:24-75
c118901_g1	124.00	7.00	5.083	0.169	-4.27	4.24e-04	2.24e-02	yes	down	_	_	_	_	_
c105605_g2	0.00	62.00	0.000	1.411	3.92	4.25e-04	2.24e-02	yes	up	_	_	_	_	_
c110908_g1	0.00	62.00	0.000	3.362	5.11	4.25e-04	2.24e-02	yes	up	_	_	_	_	_
c111415_g3	0.00	62.00	0.000	2.883	4.90	4.25e-04	2.24e-02	yes	up	_	_	_	_	_
c107058_g1	0.00	62.00	0.000	1.586	4.08	4.25e-04	2.24e-02	yes	up	_	_	_	_	_
c102081_g2	0.00	62.00	0.000	2.896	4.90	4.25e-04	2.24e-02	yes	up	_	_	_	_	_
c163735_g1	0.00	62.00	0.000	21.299	7.74	4.25e-04	2.24e-02	yes	up	_	_	_	_	_
c128404_g2	0.00	62.00	0.000	2.491	4.70	4.25e-04	2.24e-02	yes	up	_	_	_	_	_
c103589_g1	0.00	62.00	0.000	1.404	3.91	4.25e-04	2.24e-02	yes	up	_	_	_	_	_
c113626_g2	8994.00	706.00	1089.537	52.217	-4.38	4.27e-04	2.25e-02	yes	down	_	_	_	_	_
c114643_g1	244.00	17.00	13.685	0.574	-4.35	4.29e-04	2.26e-02	yes	down	_	_	_	_	_
c105498_g2	53.00	1.00	3.360	0.041	-4.62	4.33e-04	2.27e-02	yes	down	_	_	_	_	_
c118747_g3	53.00	2.00	3.336	0.074	-4.30	4.33e-04	2.27e-02	yes	down	_	_	_	_	_
c166474_g1	139.00	9.00	15.298	0.601	-4.46	4.43e-04	2.32e-02	yes	down	small subunit ribosomal protein S3e [Clonorchis sinensis]	_	Putative uncharacterized protein	RP-S3e, RPS3	PF00189.17|Ribosomal_S3_C|Ribosomal protein S3, C-terminal domain|m.65851:118-200;PF07650.14|KH_2|KH domain|m.65851:32-93
c107078_g1	5.00	285.00	0.232	10.011	4.93	4.44e-04	2.32e-02	yes	up	hypothetical protein BRAFLDRAFT_179090 [Branchiostoma floridae]	_	_	_	PF00431.17|CUB|CUB domain|m.61492:67-163;PF00431.17|CUB|CUB domain|m.61492:197-286
c64905_g1	190.00	12.00	9.176	0.351	-4.36	4.46e-04	2.32e-02	yes	down	DnaJ homolog subfamily A member 1 [Clonorchis sinensis]	_	SJCHGC01085 protein	DNAJA1	PF01556.15|DnaJ_C|DnaJ C terminal domain|m.68782:110-330;PF00226.28|DnaJ|DnaJ domain|m.68782:6-65;PF00684.16|DnaJ_CXXCXGXG|DnaJ central domain|m.68782:135-201
c117522_g2	3.00	191.00	0.208	8.276	4.77	4.48e-04	2.32e-02	yes	up	_	_	_	_	PF01661.18|Macro|Macro domain|m.1094:2-94
c86156_g1	562.00	42.00	79.251	3.632	-4.41	4.50e-04	2.32e-02	yes	down	_	_	_	_	PF13202.3|EF-hand_5|EF hand|m.62233:128-146
c126413_g4	52.00	1.00	5.156	0.061	-5.03	4.53e-04	2.32e-02	yes	down	_	_	_	_	_
c103846_g1	52.00	2.00	13.453	0.324	-5.00	4.53e-04	2.32e-02	yes	down	PREDICTED: cannabidiolic acid synthase-like [Aplysia californica]	_	_	_	_
c106268_g1	52.00	2.00	7.710	0.182	-4.79	4.53e-04	2.32e-02	yes	down	_	_	_	_	_
c96577_g2	34.00	0.00	12.036	0.000	-6.92	4.56e-04	2.32e-02	yes	down	_	_	_	_	_
c108204_g1	34.00	0.00	1.662	0.000	-4.14	4.56e-04	2.32e-02	yes	down	_	_	_	_	_
c94240_g2	34.00	0.00	2.334	0.000	-4.61	4.56e-04	2.32e-02	yes	down	collagen type I/II/III/V/XI alpha [Clonorchis sinensis]	RecName: Full=Collagen alpha-2(V) chain; Flags: Precursor [Homo sapiens]	_	COL5AS	PF01391.15|Collagen|Collagen triple helix repeat (20 copies)|m.10806:85-142;PF01391.15|Collagen|Collagen triple helix repeat (20 copies)|m.10806:191-247;PF01391.15|Collagen|Collagen triple helix repeat (20 copies)|m.10806:244-300
c98509_g1	34.00	0.00	4.606	0.000	-5.56	4.56e-04	2.32e-02	yes	down	_	_	_	_	_
c106435_g3	34.00	0.00	2.187	0.000	-4.52	4.56e-04	2.32e-02	yes	down	_	_	_	_	_
c106435_g2	34.00	0.00	1.821	0.000	-4.26	4.56e-04	2.32e-02	yes	down	_	_	_	_	_
c71843_g2	34.00	0.00	3.238	0.000	-5.06	4.56e-04	2.32e-02	yes	down	_	_	_	_	_
c103452_g1	34.00	0.00	4.313	0.000	-5.46	4.56e-04	2.32e-02	yes	down	_	_	_	_	_
c109468_g1	0.00	61.00	0.000	2.957	4.93	4.56e-04	2.32e-02	yes	up	_	_	_	_	_
c114325_g5	0.00	61.00	0.000	3.153	5.02	4.56e-04	2.32e-02	yes	up	_	_	_	_	_
c98670_g1	0.00	61.00	0.000	2.592	4.75	4.56e-04	2.32e-02	yes	up	RecName: Full=Chlorophyll a-b binding protein 1, chloroplastic; AltName: Full=LHCII type I CAB-1; Short=LHCP; Flags: Precursor [Zea mays]	RecName: Full=Chlorophyll a-b binding protein 1, chloroplastic; AltName: Full=LHCII type I CAB-1; Short=LHCP; Flags: Precursor [Zea mays]	hypothetical protein	LHCB1	PF00504.18|Chloroa_b-bind|Chlorophyll A-B binding protein|m.25616:73-239
c122478_g1	0.00	61.00	0.000	1.985	4.38	4.56e-04	2.32e-02	yes	up	_	_	_	_	_
c105390_g3	0.00	60.00	0.000	2.532	4.72	4.56e-04	2.32e-02	yes	up	_	_	_	_	PF04824.13|Rad21_Rec8|Conserved region of Rad21 / Rec8 like protein|m.69339:61-101;PF02616.11|SMC_ScpA|Segregation and condensation protein ScpA|m.69339:48-102
c128954_g2	0.00	60.00	0.000	2.140	4.49	4.56e-04	2.32e-02	yes	up	_	_	_	_	_
c104066_g1	0.00	60.00	0.000	1.816	4.26	4.56e-04	2.32e-02	yes	up	_	_	_	_	_
c109587_g1	2.00	158.00	0.134	7.770	5.07	4.56e-04	2.32e-02	yes	up	_	_	_	_	_
c120422_g1	87.00	5.00	1.723	4.624	1.37	4.56e-04	2.32e-02	yes	up	putative major vault protein [Schistosoma mansoni]	RecName: Full=Major vault protein; Short=MVP [Danio rerio]	_	MVP	PF11978.5|MVP_shoulder|Shoulder domain|m.8666:537-655;PF01505.15|Vault|Major Vault Protein repeat|m.8666:116-156;PF01505.15|Vault|Major Vault Protein repeat|m.8666:168-208;PF01505.15|Vault|Major Vault Protein repeat|m.8666:224-263;PF01505.15|Vault|Major Vault Protein repeat|m.8666:327-385
c107631_g3	2898.00	231.00	246.343	11.888	-4.36	4.58e-04	2.33e-02	yes	down	Caprin-2 [Crassostrea gigas]	_	_	_	PF00386.18|C1q|C1q domain|m.39146:57-165
c120795_g1	1.00	126.00	0.037	2.559	4.28	4.66e-04	2.37e-02	yes	up	_	_	_	_	_
c118864_g1	3346.00	268.00	140.602	6.859	-4.34	4.69e-04	2.38e-02	yes	down	_	_	_	_	PF00822.17|PMP22_Claudin|PMP-22/EMP/MP20/Claudin family|m.58419:18-162
c116100_g1	2.00	156.00	0.367	17.620	5.25	4.69e-04	2.38e-02	yes	up	_	_	_	_	_
c112036_g1	184.00	7729.00	4.778	119.860	4.62	4.70e-04	2.38e-02	yes	up	PREDICTED: cytochrome P450 3A8-like isoform X1 [Aplysia californica]	_	_	CYP9	PF00067.19|p450|Cytochrome P450|m.40877:43-302;PF00067.19|p450|Cytochrome P450|m.40877:316-505
c119630_g2	371.00	28.00	8.944	0.405	-4.16	4.71e-04	2.38e-02	yes	down	variable lymphocyte receptor B diversity region [Petromyzon marinus]	_	_	GP1BA	PF13855.3|LRR_8|Leucine rich repeat|m.36899:6-66;PF13855.3|LRR_8|Leucine rich repeat|m.36899:56-114
c106192_g1	2.00	155.00	0.037	1.566	3.60	4.83e-04	2.42e-02	yes	up	_	_	_	_	_
c130366_g4	85.00	4.00	5.242	0.203	-4.14	4.83e-04	2.42e-02	yes	down	predicted protein [Nematostella predicted protein [Nematostella vectensis]	_	_	PARP9	PF01661.18|Macro|Macro domain|m.72925:149-266
c103521_g1	50930.00	4164.00	3904.563	192.870	-4.34	4.83e-04	2.42e-02	yes	down	endo-beta-1,4-glucanase [Ampullaria crossean]	RecName: Full=Endoglucanase; AltName: Full=CMCase; AltName: Full=Cellulase; AltName: Full=Endo-1,4-beta-glucanase	_	_	_
c116207_g1	68.00	3.00	3.495	0.095	-4.20	4.83e-04	2.42e-02	yes	down	_	_	_	_	_
c130082_g1	33.00	0.00	1.931	0.000	-4.34	4.90e-04	2.42e-02	yes	down	_	_	_	_	_
c111537_g3	33.00	0.00	2.187	0.000	-4.52	4.90e-04	2.42e-02	yes	down	_	_	_	_	_
c91117_g1	33.00	0.00	3.531	0.000	-5.18	4.90e-04	2.42e-02	yes	down	PREDICTED: 60S ribosomal protein L7a-like [Lepisosteus oculatus]	RecName: Full=60S ribosomal protein L7a [Gallus gallus]	LOC447981 protein (Fragment)	RP-L7Ae, RPL7A	PF01248.23|Ribosomal_L7Ae|Ribosomal protein L7Ae/L30e/S12e/Gadd45 family|m.46034:135-214
c106356_g3	33.00	0.00	3.067	0.000	-4.99	4.90e-04	2.42e-02	yes	down	_	_	_	_	_
c110178_g1	33.00	0.00	2.871	0.000	-4.89	4.90e-04	2.42e-02	yes	down	hypothetical protein BRAFLDRAFT_120966 [Branchiostoma floridae]	_	_	_	_
c120870_g2	33.00	0.00	2.089	0.000	-4.45	4.90e-04	2.42e-02	yes	down	_	_	_	_	_
c66305_g3	33.00	0.00	14.039	0.000	-7.14	4.90e-04	2.42e-02	yes	down	reverse transcriptase [Limulus polyphemus]	_	_	_	_
c7929_g1	0.00	59.00	0.000	1.580	4.07	4.90e-04	2.42e-02	yes	up	inner membrane complex protein [Gregarina niphandrodes]	_	_	_	PF12314.5|IMCp|Inner membrane complex protein|m.43554:99-170
c48459_g1	0.00	59.00	0.000	2.201	4.52	4.90e-04	2.42e-02	yes	up	_	_	_	_	_
c118288_g1	0.00	59.00	0.000	2.856	4.89	4.90e-04	2.42e-02	yes	up	_	_	_	_	_
c105508_g4	0.00	59.00	0.000	4.044	5.37	4.90e-04	2.42e-02	yes	up	GTPase IMAP family member 4 [Crassostrea gigas]	RecName: Full=GTPase IMAP family member 4; AltName: Full=Immunity-associated nucleotide 1 protein; Short=IAN-1; Short=hIAN1; AltName: Full=Immunity-associated prot	_	_	PF04548.13|AIG1|AIG1 family|m.9024:8-203;PF01926.20|MMR_HSR1|50S ribosome-binding GTPase|m.9024:9-130;PF02421.15|FeoB_N|Ferrous iron transport protein B|m.9024:9-143;PF04670.9|Gtr1_RagA|Gtr1/RagA G protein conserved region|m.9024:9-161
c186360_g1	0.00	59.00	0.000	0.803	3.17	4.90e-04	2.42e-02	yes	up	PREDICTED: uncharacterized protein LOC101863175 [Aplysia californica]	_	_	_	PF00094.22|VWD|von Willebrand factor type D domain|m.69097:399-560
c120029_g4	0.00	59.00	0.000	1.600	4.09	4.90e-04	2.42e-02	yes	up	valyl-tRNA synthetase, partial [Clonorchis sinensis]	RecName: Full=Valine--tRNA ligase; AltName: Full=Protein G7a; AltName: Full=Valyl-tRNA synthetase; Short=ValRS [Homo sapiens]	_	VARS, valS	_
c98860_g1	0.00	59.00	0.000	2.120	4.47	4.90e-04	2.42e-02	yes	up	_	_	_	_	_
c92500_g1	168.00	11.00	13.758	0.547	-4.42	4.92e-04	2.43e-02	yes	down	hypothetical protein T265_03501 [Opisthorchis viverrini]	RecName: Full=40S ribosomal protein SA	40S ribosomal protein SA; Required for the assembly and/or stability of the 40S ribosomal su [...]	RP-SAe, RPSA	PF00318.17|Ribosomal_S2|Ribosomal protein S2|m.21296:26-121;PF00318.17|Ribosomal_S2|Ribosomal protein S2|m.21296:125-190
c115044_g1	564.00	44.00	40.188	1.890	-4.34	4.93e-04	2.43e-02	yes	down	_	_	_	_	_
c113975_g1	3440.00	281.00	109.334	5.340	-4.33	4.95e-04	2.44e-02	yes	down	PREDICTED: uncharacterized protein LOC101857038 [Aplysia californica]	_	_	EIF3A	PF03067.12|LPMO_10|Lytic polysaccharide mono-oxygenase, cellulose-degrading|m.68598:25-217
c105812_g1	1564.00	126.00	92.423	4.483	-4.34	4.97e-04	2.45e-02	yes	down	antistasin-like protein [Haliotis discus discus]	_	_	_	PF02822.11|Antistasin|Antistasin family|m.26503:29-54;PF02822.11|Antistasin|Antistasin family|m.26503:60-84
c97485_g1	51.00	1.00	1.356	0.014	-3.67	4.98e-04	2.45e-02	yes	down	hypothetical protein LOTGIDRAFT_214741 [Lottia gigantea]	RecName: Full=Dimethylaniline monooxygenase [N-oxide-forming]	_	FMO	PF00743.16|FMO-like|Flavin-binding monooxygenase-like|m.32483:4-529;PF13738.3|Pyr_redox_3|Pyridine nucleotide-disulphide oxidoreductase|m.32483:8-227;PF13434.3|K_oxygenase|L-lysine 6-monooxygenase (NADPH-requiring)|m.32483:100-206;PF07992.11|Pyr_redox_2|Pyridine nucleotide-disulphide oxidoreductase|m.32483:4-208;PF13450.3|NAD_binding_8|NAD(P)-binding Rossmann-like domain|m.32483:8-58
c105920_g1	51.00	1.00	3.996	0.047	-4.80	4.98e-04	2.45e-02	yes	down	_	_	_	_	_
c121335_g2	3.00	184.00	0.122	5.988	4.78	5.04e-04	2.47e-02	yes	up	_	_	_	_	_
c107401_g1	3.00	184.00	0.232	8.627	4.72	5.04e-04	2.47e-02	yes	up	_	_	_	_	_
c121568_g1	101.00	6.00	4.790	0.169	-4.18	5.04e-04	2.47e-02	yes	down	_	_	_	_	_
c123887_g2	5.00	274.00	0.477	13.421	4.55	5.05e-04	2.47e-02	yes	up	_	_	_	_	_
c106747_g1	737.00	59.00	41.825	2.012	-4.31	5.10e-04	2.49e-02	yes	down	_	_	_	_	PF13499.3|EF-hand_7|EF-hand domain pair|m.48675:26-119;PF13202.3|EF-hand_5|EF hand|m.48675:26-44;PF13202.3|EF-hand_5|EF hand|m.48675:46-57;PF13202.3|EF-hand_5|EF hand|m.48675:100-118;PF13833.3|EF-hand_8|EF-hand domain pair|m.48675:28-45;PF13833.3|EF-hand_8|EF-hand domain pair|m.48675:100-117
c62274_g1	84.00	5.00	28.067	1.060	-4.60	5.12e-04	2.49e-02	yes	down	hypothetical protein T265_01187 [Opisthorchis viverrini]	RecName: Full=60S acidic ribosomal protein P2-2 [Arabidopsis thaliana]	similar to putative ribosomal protein P2	RP-LP2, RPLP2	PF00428.16|Ribosomal_60s|60s Acidic ribosomal protein|m.9548:28-128
c108874_g1	198.00	14.00	45.576	2.018	-4.43	5.16e-04	2.49e-02	yes	down	PREDICTED: latrophilin-1-like isoform X1 [Maylandia zebra]	RecName: Full=Latrophilin Cirl [Drosophila yakuba]	_	LPHN1	PF02140.15|Gal_Lectin|Galactose binding lectin domain|m.33748:88-167
c94899_g1	100.00	6.00	36.351	1.391	-4.61	5.17e-04	2.49e-02	yes	down	hypothetical protein T265_11726 [Opisthorchis viverrini]	RecName: Full=60S ribosomal protein L35	SJCHGC05478 protein	RP-L35e, RPL35	PF00831.20|Ribosomal_L29|Ribosomal L29 protein|m.21981:14-72
c127004_g4	100.00	6.00	2.798	0.101	-3.85	5.17e-04	2.49e-02	yes	down	Deleted in malignant brain tumors 1 protein [Crassostrea gigas]	RecName: Full=Neurotrypsin; AltName: Full=Serine protease 12; Flags: Precursor [Rattus norvegicus]	_	PRSS12	PF00530.15|SRCR|Scavenger receptor cysteine-rich domain|m.32727:35-134;PF00530.15|SRCR|Scavenger receptor cysteine-rich domain|m.32727:177-275;PF00100.20|Zona_pellucida|Zona pellucida-like domain|m.32727:295-537
c188071_g1	393.00	30.00	128.114	6.211	-4.34	5.17e-04	2.49e-02	yes	down	_	_	_	_	_
c106346_g1	1.00	122.00	0.110	4.280	4.38	5.19e-04	2.49e-02	yes	up	hypothetical protein M513_12164 [Trichuris suis]	RecName: Full=Uncharacterized histidine-rich protein DDB_G0274557; Flags: Precursor [Dictyostelium discoideum]	_	_	_
c118228_g1	8.00	391.00	0.171	5.151	4.28	5.22e-04	2.49e-02	yes	up	_	_	_	_	_
c79682_g1	20718.00	1737.00	3072.586	158.292	-4.28	5.26e-04	2.49e-02	yes	down	hypothetical protein LOTGIDRAFT_163589 [Lottia gigantea]	_	_	_	PF09056.8|Phospholip_A2_3|Prokaryotic phospholipase A2|m.70100:23-116
c102034_g1	2.00	151.00	0.098	4.327	4.48	5.27e-04	2.49e-02	yes	up	_	_	_	_	_
c78527_g1	32.00	0.00	1.564	0.000	-4.06	5.28e-04	2.49e-02	yes	down	_	_	_	_	_
c111203_g3	32.00	0.00	3.324	0.000	-5.10	5.28e-04	2.49e-02	yes	down	_	_	_	_	_
c109027_g1	32.00	0.00	2.737	0.000	-4.83	5.28e-04	2.49e-02	yes	down	_	_	_	_	_
c95637_g1	32.00	0.00	11.180	0.000	-6.82	5.28e-04	2.49e-02	yes	down	_	_	_	_	_
c131411_g1	32.00	0.00	1.955	0.000	-4.36	5.28e-04	2.49e-02	yes	down	_	_	_	_	PF00431.17|CUB|CUB domain|m.74191:48-139;PF00431.17|CUB|CUB domain|m.74191:169-259
c127441_g3	32.00	0.00	1.833	0.000	-4.27	5.28e-04	2.49e-02	yes	down	_	_	_	_	_
c113967_g2	32.00	0.00	1.992	0.000	-4.39	5.28e-04	2.49e-02	yes	down	_	_	_	_	_
c32304_g1	32.00	0.00	1.931	0.000	-4.34	5.28e-04	2.49e-02	yes	down	cytochrome c oxidase subunit I [Unionicola parkeri]	_	cytochrome c oxidase subunit I; Cytochrome c oxidase is the component of the respiratory cha [...]	COX1	_
c120348_g1	32.00	0.00	2.077	0.000	-4.44	5.28e-04	2.49e-02	yes	down	_	_	_	_	_
c65796_g1	32.00	0.00	48.081	0.000	-8.91	5.28e-04	2.49e-02	yes	down	PREDICTED: LOW QUALITY PROTEIN: low-density lipoprotein receptor-related protein 1-like [Chelonia mydas]	_	_	LRP1, CD91	_
c111450_g1	0.00	58.00	0.000	3.301	5.09	5.28e-04	2.49e-02	yes	up	C-type lectin 2 [Anguilla japonica]	RecName: Full=C-type lectin domain family 10 member A; AltName: Full=MMGL; AltName: Full=Macrophage asialoglycoprotein-binding protein 1; Short=M-ASGP-BP-1; AltName:	_	CLEC10A, CLECSF13, CLECSF14	PF00059.18|Lectin_C|Lectin C-type domain|m.9342:43-150
c110102_g2	0.00	58.00	0.000	2.910	4.91	5.28e-04	2.49e-02	yes	up	_	_	_	_	_
c128823_g1	0.00	58.00	0.000	4.685	5.58	5.28e-04	2.49e-02	yes	up	_	_	_	_	_
c185849_g1	0.00	58.00	0.000	1.451	3.96	5.28e-04	2.49e-02	yes	up	_	_	_	_	_
c109402_g1	0.00	58.00	0.000	3.659	5.23	5.28e-04	2.49e-02	yes	up	_	_	_	_	_
c39429_g1	0.00	58.00	0.000	1.931	4.34	5.28e-04	2.49e-02	yes	up	_	_	_	_	_
c55742_g1	0.00	58.00	0.000	2.950	4.93	5.28e-04	2.49e-02	yes	up	_	_	_	_	_
c104755_g1	0.00	58.00	0.000	2.376	4.63	5.28e-04	2.49e-02	yes	up	_	_	_	_	_
c118667_g4	0.00	58.00	0.000	5.617	5.84	5.28e-04	2.49e-02	yes	up	_	_	_	_	_
c103025_g3	0.00	58.00	0.000	2.613	4.76	5.28e-04	2.49e-02	yes	up	_	_	_	_	_
c116819_g2	0.00	58.00	0.000	1.735	4.20	5.28e-04	2.49e-02	yes	up	hypothetical protein BRAFLDRAFT_126413 [Branchiostoma floridae]	_	_	AUB, PIWI	_
c125469_g5	213.00	15.00	23.900	1.026	-4.41	5.28e-04	2.49e-02	yes	down	_	_	_	_	_
c116383_g1	1308.00	108.00	77.748	3.861	-4.30	5.31e-04	2.50e-02	yes	down	PREDICTED: SCO-spondin-like [Aplysia californica]	RecName: Full=SCO-spondin; Flags: Precursor [Mus musculus]	_	_	PF00090.16|TSP_1|Thrombospondin type 1 domain|m.59756:130-168
c126380_g5	14.00	625.00	0.293	7.514	4.28	5.32e-04	2.50e-02	yes	up	PREDICTED: uncharacterized protein LOC101846237 [Aplysia californica]	_	_	_	PF12796.4|Ank_2|Ankyrin repeats (3 copies)|m.50739:46-136
c113311_g1	1033.00	84.00	29.863	1.451	-4.27	5.33e-04	2.50e-02	yes	down	_	_	_	_	_
c111916_g1	212.00	15.00	11.535	0.493	-4.29	5.34e-04	2.50e-02	yes	down	_	_	_	_	_
c109195_g1	115.00	7.00	16.923	0.635	-4.53	5.42e-04	2.54e-02	yes	down	hypothetical protein CGI_10025563 [Crassostrea gigas]	_	_	_	PF09056.8|Phospholip_A2_3|Prokaryotic phospholipase A2|m.76204:39-105
c126755_g1	179.00	12.00	5.315	0.432	-3.35	5.44e-04	2.54e-02	yes	down	_	_	_	_	_
c96495_g1	49.00	1.00	3.776	0.047	-4.72	5.49e-04	2.56e-02	yes	down	_	_	_	_	_
c90490_g1	49.00	1.00	5.645	0.068	-5.10	5.49e-04	2.56e-02	yes	down	_	_	_	_	_
c71002_g2	991.00	81.00	58.772	2.889	-4.30	5.50e-04	2.57e-02	yes	down	uncharacterized protein LOC494720 [Xenopus laevis]	RecName: Full=Elongation factor 1-alpha; Short=EF-1-alpha [Oryzias latipes]	hypothetical protein; This protein promotes the GTP-dependent binding of aminoacyl-tRNA to t [...]	EEF1A	PF03143.14|GTP_EFTU_D3|Elongation factor Tu C-terminal domain|m.17186:238-345;PF00009.24|GTP_EFTU|Elongation factor Tu GTP binding domain|m.17186:1-136;PF03144.22|GTP_EFTU_D2|Elongation factor Tu domain 2|m.17186:164-229
c123886_g1	321.00	25.00	10.716	0.500	-4.17	5.58e-04	2.60e-02	yes	down	hypothetical protein CGI_10010463 [Crassostrea gigas]	_	_	_	PF03067.12|LPMO_10|Lytic polysaccharide mono-oxygenase, cellulose-degrading|m.22402:26-212
c113302_g1	2.00	149.00	0.073	3.058	4.19	5.59e-04	2.60e-02	yes	up	_	_	_	_	_
c125020_g3	2.00	148.00	0.073	5.657	5.06	5.59e-04	2.60e-02	yes	up	_	_	_	_	_
c91580_g1	145.00	10.00	16.666	0.702	-4.39	5.67e-04	2.61e-02	yes	down	large subunit ribosomal protein L15e [Clonorchis sinensis]	RecName: Full=60S ribosomal protein L15	Ribosomal protein L15	RP-L15e, RPL15	PF00827.14|Ribosomal_L15e|Ribosomal L15|m.6505:2-191
c119436_g2	0.00	57.00	0.000	4.631	5.56	5.69e-04	2.61e-02	yes	up	_	_	_	_	_
c111972_g1	0.00	57.00	0.000	1.323	3.83	5.69e-04	2.61e-02	yes	up	_	_	_	_	_
c45062_g1	0.00	57.00	0.000	1.499	4.00	5.69e-04	2.61e-02	yes	up	cytochrome c oxidase subunit I [Eriocheir sinensis]	RecName: Full=Cytochrome c oxidase subunit 1; AltName: Full=Cytochrome c oxidase polypeptide I (mitochondrion) [Drosophila melanogaster]	mitochondrial Cytochrome c oxidase subunit I; Cytochrome c oxidase is the component of the r [...]	COX1	_
c86083_g1	0.00	57.00	0.000	1.154	3.65	5.69e-04	2.61e-02	yes	up	_	_	_	_	_
c48603_g1	0.00	57.00	0.000	1.310	3.82	5.69e-04	2.61e-02	yes	up	_	_	_	_	_
c125520_g4	0.00	57.00	0.000	1.937	4.35	5.69e-04	2.61e-02	yes	up	_	_	_	_	_
c81313_g1	0.00	57.00	0.000	10.828	6.77	5.69e-04	2.61e-02	yes	up	_	_	_	_	_
c116656_g1	0.00	56.00	0.000	1.640	4.12	5.69e-04	2.61e-02	yes	up	_	_	_	_	_
c123627_g2	0.00	56.00	0.000	4.192	5.42	5.69e-04	2.61e-02	yes	up	_	_	_	_	_
c105053_g1	0.00	56.00	0.000	2.525	4.71	5.69e-04	2.61e-02	yes	up	_	_	_	_	_
c124665_g2	0.00	56.00	0.000	1.607	4.09	5.69e-04	2.61e-02	yes	up	hypothetical protein [Plasmodium chabaudi chabaudi]	_	_	BRX1, BRIX1	_
c121566_g1	286.00	22.00	38.257	1.809	-4.33	5.77e-04	2.64e-02	yes	down	PREDICTED: tolloid-like protein 2, partial [Ornithorhynchus anatinus]	RecName: Full=Bone morphogenetic protein 1; Short=BMP-1; Flags: Precursor [Xenopus laevis]	_	BMP1, TLD	PF00431.17|CUB|CUB domain|m.28899:80-195;PF14670.3|FXa_inhibition|Coagulation Factor Xa inhibitory site|m.28899:43-76
c94130_g1	192.00	14.00	12.585	0.554	-4.28	5.77e-04	2.64e-02	yes	down	hypothetical protein T265_04973 [Opisthorchis viverrini]	RecName: Full=Guanine nucleotide-binding protein subunit beta-2-like 1; AltName: Full=Receptor of activated protein kinase C; Short=RACK [Oreochromis niloticus]	SJCHGC01669 protein	RACK1	PF00400.29|WD40|WD domain, G-beta repeat|m.59450:22-57;PF00400.29|WD40|WD domain, G-beta repeat|m.59450:69-104;PF00400.29|WD40|WD domain, G-beta repeat|m.59450:108-146;PF00400.29|WD40|WD domain, G-beta repeat|m.59450:151-191;PF00400.29|WD40|WD domain, G-beta repeat|m.59450:200-233;PF00400.29|WD40|WD domain, G-beta repeat|m.59450:247-273;PF00400.29|WD40|WD domain, G-beta repeat|m.59450:301-325
c130953_g1	65.00	3.00	6.500	0.182	-4.55	5.80e-04	2.65e-02	yes	down	_	_	_	_	_
c119488_g2	128.00	8.00	35.593	1.404	-4.57	5.83e-04	2.66e-02	yes	down	_	_	_	_	_
c108644_g1	10591.00	914.00	899.059	47.201	-4.25	5.85e-04	2.66e-02	yes	down	PREDICTED: uncharacterized protein LOC100368219 [Saccoglossus kowalevskii]	_	_	_	PF15998.2|DUF4773|Domain of unknown function (DUF4773)|m.40447:58-150
c94003_g1	80.00	5.00	21.786	0.857	-4.52	5.94e-04	2.70e-02	yes	down	SJCHGC06232 protein [Schistosoma Ribosomal protein S19a [Schistosoma japonicum]	RecName: Full=40S ribosomal protein S19a [Drosophila melanogaster]	SJCHGC06232 protein	RP-S19e, RPS19	PF01090.16|Ribosomal_S19e|Ribosomal protein S19e|m.71241:13-146
c95599_g1	80.00	5.00	3.226	0.122	-3.91	5.94e-04	2.70e-02	yes	down	hypothetical protein T265_06731 [Opisthorchis viverrini]	RecName: Full=Protein arginine N-methyltransferase 1; AltName: Full=Heterogeneous nuclear ribonucleoprotein methyltransferase-like protein 2; AltName: Full=Histone	Arginine methyltransferase 1 (EC 2.1.1.-)	PRMT1	PF13649.3|Methyltransf_25|Methyltransferase domain|m.7626:85-184;PF06325.10|PrmA|Ribosomal protein L11 methyltransferase (PrmA)|m.7626:78-157;PF13847.3|Methyltransf_31|Methyltransferase domain|m.7626:81-157;PF08003.8|Methyltransf_9|Protein of unknown function (DUF1698)|m.7626:77-187;PF08241.9|Methyltransf_11|Methyltransferase domain|m.7626:86-186;PF05175.11|MTS|Methyltransferase small domain|m.76…
c123666_g1	4.00	232.00	0.098	3.672	4.25	5.94e-04	2.70e-02	yes	up	PREDICTED: deoxynucleoside triphosphate triphosphohydrolase SAMHD1-like [Xiphophorus maculatus]	RecName: Full=Deoxynucleoside triphosphate triphosphohydrolase SAMHD1; Short=dNTPase; AltName: Full=Dendritic cell-derived IFNG-induced protein; Short=DCIP; AltNam	annotation not available	_	PF01966.19|HD|HD domain|m.10033:143-301
c104039_g1	143.00	10.00	7.062	0.297	-4.17	5.96e-04	2.71e-02	yes	down	PREDICTED: SCO-spondin-like [Aplysia californica]	RecName: Full=SCO-spondin; Flags: Precursor [Gallus gallus]	_	_	PF00094.22|VWD|von Willebrand factor type D domain|m.27218:87-238;PF08742.8|C8|C8 domain|m.27218:280-344;PF01826.14|TIL|Trypsin Inhibitor like cysteine rich domain|m.27218:348-400
c109079_g1	174.00	12.00	23.656	14.683	-0.68	5.99e-04	2.72e-02	no	down	_	_	_	_	PF00431.17|CUB|CUB domain|m.48401:54-134
c64968_g1	64.00	3.00	19.770	0.587	-4.85	6.02e-04	2.73e-02	yes	down	hypothetical protein T265_07425 [Opisthorchis viverrini]	_	SJCHGC00575 protein	RP-S11e, RPS11	PF00366.17|Ribosomal_S17|Ribosomal protein S17|m.68852:69-138;PF16205.2|Ribosomal_S17_N|Ribosomal_S17 N-terminal|m.68852:18-67
c54086_g1	48.00	2.00	1.821	0.047	-3.71	6.06e-04	2.73e-02	yes	down	hypothetical protein T265_10604 [Opisthorchis viverrini]	RecName: Full=T-complex protein 1 subunit beta; Short=TCP-1-beta; AltName: Full=CCT-beta [Bos taurus]	chaperonin containing TCP1, subunit 2 (beta)	CCT2	PF00118.21|Cpn60_TCP1|TCP-1/cpn60 chaperonin family|m.7265:42-533
c127617_g1	5.00	260.00	0.318	12.070	4.86	6.07e-04	2.73e-02	yes	up	_	_	_	_	_
c119176_g1	885.00	75.00	34.824	1.769	-4.22	6.07e-04	2.73e-02	yes	down	_	_	_	_	PF09458.7|H_lectin|H-type lectin domain|m.66561:313-378
c124650_g2	1302.00	111.00	31.353	1.593	-4.22	6.08e-04	2.73e-02	yes	down	PREDICTED: ovochymase-1 [Chelonia mydas]	RecName: Full=Suppressor of tumorigenicity 14 protein; AltName: Full=Matriptase; AltName: Full=Membrane-type serine protease 1; Short=MT-SP1; AltName: Full=Prostami	_	PLG	PF00089.23|Trypsin|Trypsin|m.46761:161-405
c84347_g1	31.00	0.00	1.417	0.000	-3.92	6.15e-04	2.73e-02	yes	down	isocitrate lyase [Chitinibacter tainanensis]	_	isocitrate lyase	E4.1.3.1, aceA	PF00463.18|ICL|Isocitrate lyase family|m.37580:36-271;PF00463.18|ICL|Isocitrate lyase family|m.37580:273-448;PF13714.3|PEP_mutase|Phosphoenolpyruvate phosphomutase|m.37580:97-336
c111203_g1	31.00	0.00	3.800	0.000	-5.29	6.15e-04	2.73e-02	yes	down	_	_	_	_	_
c114978_g1	31.00	0.00	4.949	0.000	-5.66	6.15e-04	2.73e-02	yes	down	_	_	_	_	_
c54414_g1	31.00	0.00	2.248	0.000	-4.55	6.15e-04	2.73e-02	yes	down	_	_	_	_	_
c113402_g1	0.00	55.00	0.000	1.519	4.02	6.15e-04	2.73e-02	yes	up	_	_	_	_	_
c90982_g1	0.00	55.00	0.000	1.809	4.25	6.15e-04	2.73e-02	yes	up	_	_	_	_	_
c69923_g1	0.00	55.00	0.000	2.235	4.55	6.15e-04	2.73e-02	yes	up	hypothetical protein DAPPUDRAFT_36788 [Daphnia pulex]	_	_	PIF1	_
c115867_g2	0.00	55.00	0.000	1.053	3.53	6.15e-04	2.73e-02	yes	up	_	_	_	_	_
c105439_g2	0.00	55.00	0.000	2.005	4.40	6.15e-04	2.73e-02	yes	up	_	_	_	_	_
c86818_g1	0.00	55.00	0.000	1.870	4.30	6.15e-04	2.73e-02	yes	up	_	_	_	_	_
c121509_g1	0.00	55.00	0.000	0.844	3.24	6.15e-04	2.73e-02	yes	up	PREDICTED: uncharacterized protein LOC101862849 isoform X1 [Aplysia californica]	_	_	_	_
c123125_g4	0.00	55.00	0.000	1.809	4.25	6.15e-04	2.73e-02	yes	up	_	_	_	_	_
c102688_g3	0.00	55.00	0.000	2.343	4.61	6.15e-04	2.73e-02	yes	up	_	_	_	_	_
c119973_g1	1234.00	106.00	98.129	5.158	-4.22	6.18e-04	2.74e-02	yes	down	_	_	_	_	_
c124823_g1	8.00	370.00	0.110	3.132	3.94	6.22e-04	2.76e-02	yes	up	_	_	_	_	_
c89357_g1	203.00	15.00	19.428	0.871	-4.33	6.22e-04	2.76e-02	yes	down	hypothetical protein T265_02267 [Opisthorchis viverrini]	RecName: Full=60S ribosomal protein L8 [Rattus norvegicus]	60S ribosomal protein L8	RP-L8e, RPL8	PF03947.15|Ribosomal_L2_C|Ribosomal Proteins L2, C-terminal domain|m.10211:97-227;PF00181.20|Ribosomal_L2|Ribosomal Proteins L2, RNA binding domain|m.10211:13-90
c95996_g1	1.00	115.00	0.049	4.402	4.92	6.26e-04	2.77e-02	yes	up	_	_	_	_	_
c96984_g1	125.00	8.00	18.218	0.716	-4.49	6.29e-04	2.78e-02	yes	down	hypothetical protein T265_11593 [Opisthorchis viverrini]	RecName: Full=60S ribosomal protein L18	SJCHGC06655 protein	RP-L18e, RPL18	PF17135.1|Ribosomal_L18|Ribosomal protein 60S L18 and 50S L18e|m.20182:2-188
c124306_g3	47.00	2.00	7.392	0.196	-4.66	6.38e-04	2.81e-02	yes	down	_	_	_	_	_
c112201_g2	47.00	2.00	2.957	0.074	-4.13	6.38e-04	2.81e-02	yes	down	hypothetical protein BRAFLDRAFT_68921 [Branchiostoma floridae]	_	_	DMBT1	PF00530.15|SRCR|Scavenger receptor cysteine-rich domain|m.54639:11-106;PF00530.15|SRCR|Scavenger receptor cysteine-rich domain|m.54639:159-236
c109899_g1	1081.00	94.00	61.082	3.193	-4.22	6.46e-04	2.82e-02	yes	down	_	_	_	_	PF14478.3|DUF4430|Domain of unknown function (DUF4430)|m.47913:97-153
c99641_g1	3.00	170.00	0.171	5.806	4.45	6.48e-04	2.82e-02	yes	up	hypothetical protein [Anaplasma hypothetical protein U370_02635 [Anaplasma marginale str. Dawn]	_	_	_	_
c107221_g1	2.00	142.00	0.122	5.124	4.56	6.51e-04	2.82e-02	yes	up	_	_	_	_	_
c63044_g1	78.00	4.00	0.953	0.027	-3.05	6.51e-04	2.82e-02	yes	down	lactose operon repressor [Escherichia coli]	RecName: Full=Lactose operon repressor [Escherichia coli K-12]	lac repressor	_	PF13377.3|Peripla_BP_3|Periplasmic binding protein-like domain|m.46892:130-288;PF00532.18|Peripla_BP_1|Periplasmic binding proteins and sugar binding domain of LacI family|m.46892:37-285;PF13407.3|Peripla_BP_4|Periplasmic binding protein domain|m.46892:38-270;PF01636.20|APH|Phosphotransferase enzyme family|m.46893:89-256;PF07690.13|MFS_1|Major Facilitator Superfamily|m.46894:2-83
c90601_g1	78.00	5.00	4.252	0.162	-4.05	6.51e-04	2.82e-02	yes	down	_	_	_	_	_
c127351_g1	124.00	8.00	2.236	0.088	-3.64	6.55e-04	2.82e-02	yes	down	hypothetical protein LOTGIDRAFT_238308 [Lottia gigantea]	_	_	CSMD	PF00041.18|fn3|Fibronectin type III domain|m.11619:767-837
c115740_g5	14.00	585.00	0.648	12.617	4.09	6.64e-04	2.82e-02	yes	up	_	_	_	_	_
c96022_g1	30.00	0.00	11.522	0.000	-6.86	6.65e-04	2.82e-02	yes	down	_	_	_	_	_
c106977_g1	30.00	0.00	5.938	0.000	-5.92	6.65e-04	2.82e-02	yes	down	_	_	_	_	_
c53604_g1	30.00	0.00	3.556	0.000	-5.19	6.65e-04	2.82e-02	yes	down	_	_	_	_	_
c76093_g1	30.00	0.00	2.871	0.000	-4.89	6.65e-04	2.82e-02	yes	down	phosphoglycerate kinase [Fasciola hepatica]	RecName: Full=Phosphoglycerate kinase [Opisthorchis sinensis]	Phosphoglycerate kinase (EC 2.7.2.3)	PGK, pgk	PF00162.16|PGK|Phosphoglycerate kinase|m.61318:8-231
c105177_g1	30.00	0.00	3.336	0.000	-5.10	6.65e-04	2.82e-02	yes	down	high mobility group box 1 protein [Gossypium hirsutum]	RecName: Full=High mobility group B protein 3; AltName: Full=High mobility group protein B 2; Short=AtHMGbeta2; Short=HMG beta 2; AltName: Full=Nucleosome/chromati	annotation not avaliable	_	PF00505.16|HMG_box|HMG (high mobility group) box|m.25530:64-133;PF09011.7|HMG_box_2|HMG-box domain|m.25530:61-133
c37403_g1	30.00	0.00	1.283	0.000	-3.79	6.65e-04	2.82e-02	yes	down	_	_	_	_	_
c116629_g4	30.00	0.00	2.835	0.000	-4.88	6.65e-04	2.82e-02	yes	down	_	_	_	_	_
c152871_g1	30.00	0.00	2.517	0.000	-4.71	6.65e-04	2.82e-02	yes	down	_	_	_	_	_
c103091_g1	30.00	0.00	1.527	0.000	-4.02	6.65e-04	2.82e-02	yes	down	_	_	_	_	_
c71017_g1	30.00	0.00	1.857	0.000	-4.29	6.65e-04	2.82e-02	yes	down	60S acidic ribosomal protein P0, putative [Ixodes scapularis]	RecName: Full=60S acidic ribosomal protein P0; Short=CcP0	60S acidic ribosomal protein P0, putative	RP-LP0, RPLP0	PF00466.17|Ribosomal_L10|Ribosomal protein L10|m.29342:8-105;PF00428.16|Ribosomal_60s|60s Acidic ribosomal protein|m.29342:231-314
c51975_g1	30.00	0.00	4.558	0.000	-5.54	6.65e-04	2.82e-02	yes	down	cytochrome c oxidase subunit II [Unionicola parkeri]	RecName: Full=Cytochrome c oxidase subunit 2; AltName: Full=Cytochrome c oxidase polypeptide II	_	COX2	_
c70333_g1	30.00	0.00	4.020	0.000	-5.36	6.65e-04	2.82e-02	yes	down	_	_	_	_	_
c66914_g1	30.00	0.00	2.358	0.000	-4.62	6.65e-04	2.82e-02	yes	down	_	_	_	_	_
c100951_g1	0.00	54.00	0.000	1.026	3.49	6.65e-04	2.82e-02	yes	up	_	_	_	_	_
c53033_g1	0.00	54.00	0.000	2.025	4.41	6.65e-04	2.82e-02	yes	up	_	_	_	_	_
c111573_g1	0.00	54.00	0.000	1.694	4.17	6.65e-04	2.82e-02	yes	up	_	_	_	_	_
c119073_g1	0.00	54.00	0.000	2.032	4.41	6.65e-04	2.82e-02	yes	up	_	_	_	_	_
c111211_g1	0.00	54.00	0.000	2.525	4.71	6.65e-04	2.82e-02	yes	up	_	_	_	_	_
c105362_g1	0.00	54.00	0.000	0.884	3.30	6.65e-04	2.82e-02	yes	up	hypothetical protein LOTGIDRAFT_154208 [Lottia gigantea]	RecName: Full=Cadherin-23; AltName: Full=Otocadherin; Flags: Precursor [Homo sapiens]	_	DCHS1_2, PCDH16_23	PF00028.14|Cadherin|Cadherin domain|m.9139:43-126;PF00028.14|Cadherin|Cadherin domain|m.9139:142-231;PF00028.14|Cadherin|Cadherin domain|m.9139:246-351;PF00028.14|Cadherin|Cadherin domain|m.9139:479-564;PF00028.14|Cadherin|Cadherin domain|m.9139:594-677
c114024_g4	0.00	54.00	0.000	4.287	5.46	6.65e-04	2.82e-02	yes	up	_	_	_	_	_
c120192_g1	0.00	54.00	0.000	5.333	5.76	6.65e-04	2.82e-02	yes	up	_	_	_	_	_
c95964_g4	0.00	54.00	0.000	2.187	4.52	6.65e-04	2.82e-02	yes	up	_	_	_	_	_
c114054_g1	0.00	53.00	0.000	2.444	4.67	6.65e-04	2.82e-02	yes	up	_	_	_	_	_
c57320_g1	0.00	53.00	0.000	2.586	4.75	6.65e-04	2.82e-02	yes	up	Octapeptide-repeat protein T2, partial [Ophiophagus hannah]	_	_	_	_
c109085_g1	0.00	53.00	0.000	3.018	4.96	6.65e-04	2.82e-02	yes	up	_	_	_	_	_
c88879_g1	0.00	53.00	0.000	2.005	4.40	6.65e-04	2.82e-02	yes	up	_	_	_	_	_
c98451_g1	0.00	53.00	0.000	1.499	4.00	6.65e-04	2.82e-02	yes	up	_	_	_	_	_
c104116_g1	0.00	53.00	0.000	1.067	3.54	6.65e-04	2.82e-02	yes	up	_	_	_	_	_
c113331_g1	0.00	53.00	0.000	1.566	4.06	6.65e-04	2.82e-02	yes	up	_	_	_	_	_
c12075_g1	0.00	53.00	0.000	1.667	4.14	6.65e-04	2.82e-02	yes	up	_	_	_	_	_
c123949_g2	3.00	169.00	0.147	5.090	4.39	6.65e-04	2.82e-02	yes	up	_	_	_	_	_
c127363_g1	93.00	6.00	9.298	0.365	-4.34	6.65e-04	2.82e-02	yes	down	_	_	_	_	_
c111604_g1	9.00	418.00	0.061	1.721	3.50	6.68e-04	2.82e-02	yes	up	PREDICTED: basement membrane-specific heparan sulfate proteoglycan core protein-like [Aplysia californica]	_	_	HMCN	PF13927.3|Ig_3|Immunoglobulin domain|m.37039:678-744;PF13927.3|Ig_3|Immunoglobulin domain|m.37039:769-831;PF13927.3|Ig_3|Immunoglobulin domain|m.37039:1032-1093;PF13927.3|Ig_3|Immunoglobulin domain|m.37039:1206-1269;PF13927.3|Ig_3|Immunoglobulin domain|m.37039:1295-1357;PF13927.3|Ig_3|Immunoglobulin domain|m.37039:1649-1709;PF13927.3|Ig_3|Immunoglobulin domain|m.37039:1829-1884;PF13927.3|Ig_3|Imm…
c85863_g1	319.00	26.00	76.135	3.888	-4.26	6.69e-04	2.83e-02	yes	down	_	_	_	_	_
c120558_g1	992.00	87.00	43.511	2.289	-4.19	6.75e-04	2.85e-02	yes	down	hypothetical protein LOTGIDRAFT_118461 [Lottia gigantea]	_	_	GPAT1_2	PF01663.19|Phosphodiest|Type I phosphodiesterase / nucleotide pyrophosphatase|m.51599:26-339;PF01676.15|Metalloenzyme|Metalloenzyme superfamily|m.51599:161-236
c92042_g1	2458.00	220.00	95.771	5.131	-4.20	6.76e-04	2.85e-02	yes	down	PREDICTED: chitotriosidase-1 isoform X1 [Monodelphis domestica]	RecName: Full=Chitotriosidase-1; AltName: Full=Chitinase-1; Flags: Precursor [Homo sapiens]	_	E3.2.1.14	PF00704.25|Glyco_hydro_18|Glycosyl hydrolases family 18|m.58469:27-369
c122422_g1	13883.00	1258.00	192.971	10.410	-4.20	6.81e-04	2.87e-02	yes	down	_	_	_	_	PF00337.19|Gal-bind_lectin|Galactoside-binding lectin|m.20372:5-137
c98067_g1	92.00	6.00	13.184	0.527	-4.41	6.83e-04	2.87e-02	yes	down	hypothetical protein T265_15382 [Opisthorchis viverrini]	RecName: Full=40S ribosomal protein S5a [Drosophila melanogaster]	SJCHGC06003 protein	RP-S5e, RPS5	PF00177.18|Ribosomal_S7|Ribosomal protein S7p/S5e|m.13307:66-213
c124480_g2	6.00	277.00	0.562	15.709	4.58	6.89e-04	2.89e-02	yes	up	_	_	_	_	_
c129244_g1	284.00	23.00	10.019	0.486	-4.11	7.06e-04	2.96e-02	yes	down	PREDICTED: low-density lipoprotein receptor-related protein 5 [Callorhinchus milii]	_	_	LRP5_6	PF00431.17|CUB|CUB domain|m.37421:2-104;PF00431.17|CUB|CUB domain|m.37421:462-570;PF00058.14|Ldl_recept_b|Low-density lipoprotein receptor repeat class B|m.37421:195-234;PF00058.14|Ldl_recept_b|Low-density lipoprotein receptor repeat class B|m.37421:238-279;PF14670.3|FXa_inhibition|Coagulation Factor Xa inhibitory site|m.37421:380-415
c119214_g1	2.00	137.00	0.098	3.929	4.35	7.15e-04	2.97e-02	yes	up	_	_	_	_	_
c98171_g1	76.00	5.00	6.549	0.263	-4.20	7.15e-04	2.97e-02	yes	down	_	_	_	_	_
c192262_g1	29.00	0.00	3.605	0.000	-5.21	7.21e-04	2.97e-02	yes	down	_	_	_	_	_
c118996_g2	29.00	0.00	1.784	0.000	-4.24	7.21e-04	2.97e-02	yes	down	Fibroblast growth factor receptor [Crassostrea gigas]	RecName: Full=Megakaryocyte-associated tyrosine-protein kinase; AltName: Full=CSK homologous kinase; Short=CHK; AltName: Full=Hematopoietic consensus tyrosine-lackin	_	CSK	PF07714.14|Pkinase_Tyr|Protein tyrosine kinase|m.34647:148-372;PF00069.22|Pkinase|Protein kinase domain|m.34647:152-358
c101616_g3	29.00	0.00	4.057	0.000	-5.38	7.21e-04	2.97e-02	yes	down	_	_	_	_	_
c35332_g1	29.00	0.00	4.509	0.000	-5.53	7.21e-04	2.97e-02	yes	down	_	_	_	_	_
c94681_g1	29.00	0.00	2.590	0.000	-4.75	7.21e-04	2.97e-02	yes	down	_	_	_	_	_
c60615_g3	29.00	0.00	1.283	0.000	-3.79	7.21e-04	2.97e-02	yes	down	_	_	_	_	_
c134557_g1	29.00	0.00	4.558	0.000	-5.54	7.21e-04	2.97e-02	yes	down	calmodulin-like protein 2 (CaM2) [Fasciola hepatica]	_	_	CALM	PF00036.29|EF-hand_1|EF hand|m.70846:21-47;PF00036.29|EF-hand_1|EF hand|m.70846:56-82;PF00036.29|EF-hand_1|EF hand|m.70846:94-120;PF13499.3|EF-hand_7|EF-hand domain pair|m.70846:19-81;PF13499.3|EF-hand_7|EF-hand domain pair|m.70846:93-154;PF13202.3|EF-hand_5|EF hand|m.70846:21-45;PF13202.3|EF-hand_5|EF hand|m.70846:59-81;PF13202.3|EF-hand_5|EF hand|m.70846:95-117;PF13202.3|EF-hand_5|EF hand|m.708…
c99554_g1	29.00	0.00	3.287	0.000	-5.08	7.21e-04	2.97e-02	yes	down	_	_	_	_	_
c95514_g1	29.00	0.00	1.136	0.000	-3.63	7.21e-04	2.97e-02	yes	down	_	_	_	_	_
c84646_g1	29.00	0.00	7.734	0.000	-6.29	7.21e-04	2.97e-02	yes	down	hypothetical protein SORBIDRAFT_03g034710 [Sorghum bicolor]	_	_	_	_
c78579_g1	29.00	0.00	11.791	0.000	-6.89	7.21e-04	2.97e-02	yes	down	_	_	_	_	PF08210.8|APOBEC_N|APOBEC-like N-terminal domain|m.436:3-107
c74578_g1	29.00	0.00	2.456	0.000	-4.68	7.21e-04	2.97e-02	yes	down	CaBP3 [Fasciola hepatica]	RecName: Full=Tegument antigen; AltName: Full=A12; AltName: Full=Antigen SmA22.6; AltName: Full=I(H)A [Schistosoma mansoni]	_	_	PF01221.15|Dynein_light|Dynein light chain type 1|m.59033:118-206;PF13499.3|EF-hand_7|EF-hand domain pair|m.59033:28-86;PF13202.3|EF-hand_5|EF hand|m.59033:32-51;PF13202.3|EF-hand_5|EF hand|m.59033:65-86;PF13833.3|EF-hand_8|EF-hand domain pair|m.59033:42-85
c85200_g1	0.00	52.00	0.000	1.512	4.01	7.21e-04	2.97e-02	yes	up	_	_	_	_	_
c105966_g4	0.00	52.00	0.000	2.457	4.68	7.21e-04	2.97e-02	yes	up	_	_	_	_	_
c103901_g2	0.00	52.00	0.000	3.990	5.35	7.21e-04	2.97e-02	yes	up	_	_	_	_	_
c118446_g1	0.00	52.00	0.000	3.207	5.05	7.21e-04	2.97e-02	yes	up	_	_	_	_	_
c21127_g1	0.00	52.00	0.000	1.478	3.98	7.21e-04	2.97e-02	yes	up	ferritin 2 [Eriocheir sinensis]	_	_	FTH1	PF00210.21|Ferritin|Ferritin-like domain|m.33839:45-193
c96613_g1	0.00	52.00	0.000	3.389	5.12	7.21e-04	2.97e-02	yes	up	_	_	_	_	_
c115784_g2	8856.00	817.00	1352.254	76.736	-4.14	7.29e-04	3.00e-02	yes	down	_	_	_	_	_
c121328_g1	1.00	109.00	0.061	4.003	4.67	7.32e-04	3.00e-02	yes	up	_	_	_	_	_
c117005_g1	1.00	109.00	0.049	3.166	4.45	7.32e-04	3.00e-02	yes	up	_	_	_	_	_
c103353_g1	1098.00	99.00	105.118	5.752	-4.17	7.34e-04	3.01e-02	yes	down	_	_	_	_	_
c111437_g1	2.00	136.00	0.049	2.322	4.02	7.39e-04	3.02e-02	yes	up	_	_	_	_	_
c113103_g2	75.00	5.00	3.140	0.128	-3.83	7.39e-04	3.02e-02	yes	down	PREDICTED: neuralized-like protein 4 [Nasonia vitripennis]	_	_	NEURL4	_
c94618_g1	75.00	5.00	9.628	0.392	-4.31	7.39e-04	3.02e-02	yes	down	PREDICTED: lysosomal alpha-mannosidase-like [Aplysia californica]	RecName: Full=Lysosomal alpha-mannosidase; Short=Laman; AltName: Full=Lysosomal acid alpha-mannosidase; AltName: Full=Mannosidase alpha class 2B member 1; AltName	mannosidase, alpha, class 2B, member 1	MAN2B1, LAMAN	PF01074.19|Glyco_hydro_38|Glycosyl hydrolases family 38 N-terminal domain|m.29222:48-204
c121428_g2	265.00	22.00	14.149	0.682	-4.19	7.45e-04	3.04e-02	yes	down	_	_	_	_	_
c103785_g1	45.00	1.00	2.713	0.034	-4.39	7.47e-04	3.04e-02	yes	down	_	_	_	_	_
c55409_g1	45.00	1.00	5.266	0.074	-4.95	7.47e-04	3.04e-02	yes	down	succinate dehydrogenase (ubiquinone) cytochrome b subunit [Clonorchis sinensis]	RecName: Full=Succinate dehydrogenase cytochrome b560 subunit, mitochondrial; Flags: Precursor [Caenorhabditis elegans]	SJCHGC05423 protein	SDHC, SDH3	PF01127.19|Sdh_cyt|Succinate dehydrogenase/Fumarate reductase transmembrane subunit|m.61525:76-193
c54787_g1	45.00	1.00	13.661	0.189	-5.57	7.47e-04	3.04e-02	yes	down	hypothetical protein T265_01682 [Opisthorchis viverrini]	RecName: Full=Nucleoside diphosphate kinase; Short=NDK; Short=NDP kinase; AltName: Full=Abnormal wing disks protein; AltName: Full=Killer of prune protein [Drosophila	Nucleoside diphosphate kinase (EC 2.7.4.6)	ndk, NME	PF00334.16|NDK|Nucleoside diphosphate kinase|m.35190:19-149
c109920_g2	293.00	25.00	16.288	0.837	-4.13	7.54e-04	3.07e-02	yes	down	PREDICTED: deoxyribonuclease-1-like 2 [Stegastes partitus]	RecName: Full=Deoxyribonuclease-1; AltName: Full=Deoxyribonuclease I; Short=DNase I; Flags: Precursor	_	DNASE1	PF03372.20|Exo_endo_phos|Endonuclease/Exonuclease/phosphatase family|m.25615:69-303
c15699_g1	89.00	6.00	17.937	0.749	-4.41	7.60e-04	3.09e-02	yes	down	putative ribosomal protein L18a [Schistosoma japonicum]	_	SJCHGC06172 protein	RP-L18Ae, RPL18A	PF01775.14|Ribosomal_L18A|Ribosomal proteins 50S-L18Ae/60S-L20/60S-L18A|m.69629:15-137
c108347_g1	321.00	28.00	13.526	0.709	-4.07	7.62e-04	3.09e-02	yes	down	hypothetical protein T265_07384 [Opisthorchis viverrini]	_	_	SERBP1	_
c108396_g1	1.00	108.00	0.024	1.370	3.57	7.62e-04	3.09e-02	yes	up	_	_	_	_	_
c60338_g1	74.00	5.00	11.608	0.486	-4.32	7.63e-04	3.09e-02	yes	down	RecName: Full=Fatty acid-binding protein type 3 fatty acid binding protein [Fasciola hepatica]	RecName: Full=Fatty acid-binding protein type 3	_	FABP3	PF00061.20|Lipocalin|Lipocalin / cytosolic fatty-acid binding protein family|m.60808:13-138
c88067_g1	74.00	5.00	2.994	0.122	-3.80	7.63e-04	3.09e-02	yes	down	MGC84751 protein [Xenopus MGC84751 protein [Xenopus laevis]	RecName: Full=Glutamine synthetase; Short=GS; AltName: Full=Glutamate decarboxylase; AltName: Full=Glutamate--ammonia ligase [Mus musculus]	Glutamine synthetase (EC 6.3.1.2)	glnA, GLUL	PF00120.21|Gln-synt_C|Glutamine synthetase, catalytic domain|m.73802:137-365;PF03951.16|Gln-synt_N|Glutamine synthetase, beta-Grasp domain|m.73802:41-116
c130118_g1	16.00	637.00	0.196	4.618	3.99	7.73e-04	3.12e-02	yes	up	PREDICTED: probable E3 ubiquitin-protein ligase DTX3-like [Astyanax mexicanus]	RecName: Full=Probable E3 ubiquitin-protein ligase DTX3; AltName: Full=Protein deltex-3; Short=Deltex3; AltName: Full=RING finger protein 154 [Homo 7506	_	DTX	PF01661.18|Macro|Macro domain|m.71328:4-113;PF01661.18|Macro|Macro domain|m.71328:623-738;PF13639.3|zf-RING_2|Ring finger domain|m.71328:1032-1071;PF13923.3|zf-C3HC4_2|Zinc finger, C3HC4 type (RING finger)|m.71328:1033-1070;PF13920.3|zf-C3HC4_3|Zinc finger, C3HC4 type (RING finger)|m.71328:1032-1072;PF00097.22|zf-C3HC4|Zinc finger, C3HC4 type (RING finger)|m.71328:1033-1070;PF13445.3|zf-RING_UBOX…
c127597_g2	10.00	426.00	0.794	7.001	2.99	7.74e-04	3.12e-02	yes	up	_	_	_	_	_
c79918_g1	161.00	12.00	25.183	1.154	-4.33	7.78e-04	3.13e-02	yes	down	hypothetical protein T265_12116 [Opisthorchis viverrini]	_	SJCHGC05729 protein	RP-L11e, RPL11	PF00281.16|Ribosomal_L5|Ribosomal protein L5|m.70018:14-67;PF00673.18|Ribosomal_L5_C|ribosomal L5P family C-terminus|m.70018:71-169
c74311_g1	978.00	90.00	60.569	3.355	-4.13	7.80e-04	3.13e-02	yes	down	_	_	_	_	PF01607.21|CBM_14|Chitin binding Peritrophin-A domain|m.10718:79-135
c95042_g1	0.00	51.00	0.000	2.437	4.67	7.82e-04	3.13e-02	yes	up	_	_	_	_	_
c88382_g1	0.00	51.00	0.000	1.674	4.15	7.82e-04	3.13e-02	yes	up	_	_	_	_	_
c106151_g1	0.00	51.00	0.000	1.343	3.85	7.82e-04	3.13e-02	yes	up	_	_	_	_	_
c106737_g1	0.00	51.00	0.000	2.491	4.70	7.82e-04	3.13e-02	yes	up	_	_	_	_	_
c48693_g1	0.00	51.00	0.000	2.126	4.48	7.82e-04	3.13e-02	yes	up	_	_	_	_	_
c99083_g2	0.00	51.00	0.000	1.593	4.08	7.82e-04	3.13e-02	yes	up	_	_	_	_	_
c115093_g3	0.00	51.00	0.000	1.910	4.33	7.82e-04	3.13e-02	yes	up	_	_	_	_	_
c105770_g2	7.00	319.00	0.159	4.361	4.11	7.84e-04	3.13e-02	yes	up	Poly [ADP-ribose]	_	_	PARP10_14_15	PF01661.18|Macro|Macro domain|m.69520:592-711
c111128_g1	117.00	9.00	6.623	0.304	-4.06	7.85e-04	3.13e-02	yes	down	Kynurenine formamidase [Crassostrea gigas]	_	_	_	PF04199.10|Cyclase|Putative cyclase|m.31289:29-200
c99134_g1	44.00	1.00	9.189	0.162	-5.15	7.88e-04	3.14e-02	yes	down	hypothetical protein SDRG_02838 [Saprolegnia diclina VS20]	_	_	_	_
c128641_g2	44.00	1.00	5.132	0.074	-4.91	7.88e-04	3.14e-02	yes	down	_	_	_	_	_
c120262_g6	44.00	1.00	2.016	0.027	-4.06	7.88e-04	3.14e-02	yes	down	_	_	_	_	_
c114263_g1	1.00	107.00	0.086	5.569	4.93	7.94e-04	3.16e-02	yes	up	PREDICTED: uncharacterized protein LOC754648 [Strongylocentrotus purpuratus]	_	_	_	_
c122621_g4	1.00	107.00	0.037	1.931	3.89	7.94e-04	3.16e-02	yes	up	_	_	_	_	_
c128500_g3	15.00	605.00	0.159	4.827	4.25	7.99e-04	3.17e-02	yes	up	hypothetical protein BRAFLDRAFT_84849 [Branchiostoma floridae]	RecName: Full=Uncharacterized protein Saci_1252 [Sulfolobus acidocaldarius DSM 639]	_	PARP10_14_15	PF01661.18|Macro|Macro domain|m.26980:9-125;PF01661.18|Macro|Macro domain|m.26980:249-355;PF01661.18|Macro|Macro domain|m.26980:481-597;PF13920.3|zf-C3HC4_3|Zinc finger, C3HC4 type (RING finger)|m.26980:901-942
c127025_g2	116.00	9.00	4.350	0.385	-3.20	8.01e-04	3.18e-02	yes	down	_	_	_	_	_
c122840_g3	7.00	317.00	0.110	2.802	3.79	8.06e-04	3.19e-02	yes	up	_	_	_	_	_
c114862_g2	187.00	15.00	85.373	4.402	-4.25	8.09e-04	3.20e-02	yes	down	_	_	_	_	_
c66711_g1	73.00	4.00	17.424	0.601	-4.64	8.15e-04	3.22e-02	yes	down	large subunit ribosomal protein L14e [Clonorchis sinensis]	RecName: Full=60S ribosomal protein L14	SJCHGC06827 protein	RP-L14e, RPL14	PF01929.14|Ribosomal_L14e|Ribosomal protein L14|m.17753:54-128
c104879_g2	73.00	5.00	16.728	0.716	-4.37	8.15e-04	3.22e-02	yes	down	_	_	_	_	PF07686.14|V-set|Immunoglobulin V-set domain|m.59003:38-125
c117746_g2	46.00	1688.00	2.517	55.566	4.41	8.20e-04	3.22e-02	yes	up	_	_	_	_	_
c129942_g1	5.00	236.00	0.086	4.165	4.52	8.22e-04	3.22e-02	yes	up	hypothetical protein LOTGIDRAFT_236952 [Lottia gigantea]	_	_	_	PF01347.19|Vitellogenin_N|Lipoprotein amino terminal region|m.76454:331-585
c113256_g1	3.00	158.00	0.110	3.389	4.05	8.26e-04	3.22e-02	yes	up	_	_	_	_	_
c113924_g2	1.00	105.00	0.196	37.669	7.00	8.27e-04	3.22e-02	yes	up	_	_	_	_	_
c70202_g1	58.00	3.00	12.072	0.392	-4.63	8.27e-04	3.22e-02	yes	down	hypothetical protein T265_07749 [Opisthorchis viverrini]	RecName: Full=40S ribosomal protein S13	SJCHGC09090 protein	RP-S13e, RPS13	PF08069.9|Ribosomal_S13_N|Ribosomal S13/S15 N-terminal domain|m.29337:16-75;PF00312.19|Ribosomal_S15|Ribosomal protein S15|m.29337:89-161
c80053_g1	58.00	3.00	18.243	0.601	-4.71	8.27e-04	3.22e-02	yes	down	large subunit ribosomal protein L22e [Clonorchis sinensis]	_	SJCHGC02419 protein	RP-L22e, RPL22	PF01776.14|Ribosomal_L22e|Ribosomal L22e protein family|m.51190:24-131
c88173_g1	43.00	1.00	2.236	0.034	-4.12	8.33e-04	3.22e-02	yes	down	serpin [Clonorchis sinensis]	_	_	SERPINB	PF00079.17|Serpin|Serpin (serine protease inhibitor)|m.52601:8-368
c97825_g1	43.00	2.00	2.077	0.061	-3.76	8.33e-04	3.22e-02	yes	down	hypothetical protein T265_12601, partial [Opisthorchis viverrini]	RecName: Full=Probable protein disulfide-isomerase ER-60; AltName: Full=ERP60; Flags: Precursor [Schistosoma mansoni]	_	PDIA3, GRP58	PF00085.17|Thioredoxin|Thioredoxin|m.29372:1-82;PF00085.17|Thioredoxin|Thioredoxin|m.29372:324-426;PF13848.3|Thioredoxin_6|Thioredoxin-like domain|m.29372:118-298
c89238_g1	43.00	2.00	1.723	0.041	-3.69	8.33e-04	3.22e-02	yes	down	oligosaccharyltransferase complex subunit alpha [Clonorchis sinensis]	RecName: Full=Dolichyl-diphosphooligosaccharide--protein glycosyltransferase subunit 1; AltName: Full=Dolichyl-diphosphooligosaccharide--protein glycosyltransferase	_	OST1, RPN1	PF04597.11|Ribophorin_I|Ribophorin I|m.18680:22-430
c113935_g6	13.00	519.00	0.770	18.497	4.42	8.34e-04	3.22e-02	yes	up	_	_	_	_	_
c124386_g1	6400.00	615.00	143.094	8.020	-4.14	8.37e-04	3.22e-02	yes	down	unnamed protein product [Oikopleura dioica]	RecName: Full=Glycoprotein gp2; AltName: Full=Glycoprotein X; Short=GpX; Flags: Precursor	_	_	_
c102764_g1	157.00	13.00	25.012	1.276	-4.19	8.40e-04	3.22e-02	yes	down	_	_	_	_	_
c115814_g1	2.00	131.00	0.281	1.580	2.14	8.42e-04	3.22e-02	yes	up	PREDICTED: uncharacterized protein LOC101854763 [Aplysia californica]	RecName: Full=SCO-spondin; Flags: Precursor [Gallus gallus]	_	RXFP2, LGR8	PF00001.18|7tm_1|7 transmembrane receptor (rhodopsin family)|m.19841:398-635;PF13855.3|LRR_8|Leucine rich repeat|m.19841:176-229;PF00057.15|Ldl_recept_a|Low-density lipoprotein receptor domain class A|m.19841:49-85;PF00057.15|Ldl_recept_a|Low-density lipoprotein receptor domain class A|m.19842:359-390
c98984_g1	72.00	5.00	12.341	0.527	-4.31	8.42e-04	3.22e-02	yes	down	_	_	_	_	_
c107165_g1	8831.00	852.00	2006.228	121.001	-4.05	8.45e-04	3.22e-02	yes	down	_	_	_	_	_
c110562_g1	28.00	0.00	10.178	0.000	-6.68	8.51e-04	3.22e-02	yes	down	_	_	_	_	PF03128.11|CXCXC|CXCXC repeat|m.32197:37-49
c146247_g1	28.00	0.00	1.821	0.000	-4.26	8.51e-04	3.22e-02	yes	down	_	_	_	_	_
c124769_g2	28.00	0.00	1.271	0.000	-3.78	8.51e-04	3.22e-02	yes	down	_	_	_	_	_
c48593_g2	28.00	0.00	2.419	0.000	-4.65	8.51e-04	3.22e-02	yes	down	_	_	_	_	_
c176783_g1	28.00	0.00	1.955	0.000	-4.36	8.51e-04	3.22e-02	yes	down	hypothetical protein T265_07370 [Opisthorchis viverrini]	RecName: Full=Transformer-2 protein homolog beta; Short=TRA-2 beta; Short=TRA2-beta; AltName: Full=RA301; AltName: Full=Splicing factor, arginine/serine-rich 10; Alt	_	TRA2	PF00076.19|RRM_1|RNA recognition motif. (a.k.a. RRM, RBD, or RNP domain)|m.34999:112-180
c99748_g1	28.00	0.00	10.459	0.000	-6.72	8.51e-04	3.22e-02	yes	down	_	_	_	_	_
c101635_g1	28.00	0.00	2.529	0.000	-4.72	8.51e-04	3.22e-02	yes	down	_	_	_	_	_
c74058_g1	28.00	0.00	2.651	0.000	-4.78	8.51e-04	3.22e-02	yes	down	_	_	_	_	_
c101361_g2	28.00	0.00	5.523	0.000	-5.81	8.51e-04	3.22e-02	yes	down	_	_	_	_	_
c79572_g1	0.00	50.00	0.000	1.573	4.06	8.51e-04	3.22e-02	yes	up	cytosolic orthophosphate dikinase [Zea mays subsp. mays]	RecName: Full=Pyruvate, phosphate dikinase 1, chloroplastic; AltName: Full=Pyruvate, orthophosphate dikinase 1; Flags: Precursor [Zea mays]	_	ppdK	PF02896.15|PEP-utilizers_C|PEP-utilising enzyme, TIM barrel domain|m.22409:2-352
c106168_g1	0.00	50.00	0.000	1.418	3.92	8.51e-04	3.22e-02	yes	up	_	_	_	_	_
c164937_g1	0.00	50.00	0.000	0.803	3.17	8.51e-04	3.22e-02	yes	up	PREDICTED: uncharacterized protein LOC101862849 isoform X1 [Aplysia californica]	_	_	_	_
c9909_g1	0.00	50.00	0.000	2.910	4.91	8.51e-04	3.22e-02	yes	up	_	_	_	_	_
c99331_g1	0.00	50.00	0.000	2.066	4.44	8.51e-04	3.22e-02	yes	up	_	_	_	_	_
c104581_g1	0.00	50.00	0.000	1.998	4.39	8.51e-04	3.22e-02	yes	up	_	_	_	_	_
c79335_g1	0.00	50.00	0.000	1.458	3.96	8.51e-04	3.22e-02	yes	up	_	_	_	_	_
c100894_g1	0.00	49.00	0.000	1.296	3.80	8.51e-04	3.22e-02	yes	up	_	_	_	_	_
c48294_g2	0.00	49.00	0.000	1.181	3.68	8.51e-04	3.22e-02	yes	up	_	_	_	_	_
c90627_g1	0.00	49.00	0.000	1.532	4.03	8.51e-04	3.22e-02	yes	up	_	_	_	_	_
c106075_g2	0.00	49.00	0.000	4.314	5.46	8.51e-04	3.22e-02	yes	up	hypothetical protein LOTGIDRAFT_138191, partial [Lottia gigantea]	RecName: Full=Atrial natriuretic peptide receptor 1; AltName: Full=Atrial natriuretic peptide receptor type A; Short=ANP-A; Short=ANPR-A; Short=NPR-A; AltName: Full=	_	ANPRA, NPR1	PF00069.22|Pkinase|Protein kinase domain|m.4906:6-103;PF07714.14|Pkinase_Tyr|Protein tyrosine kinase|m.4906:5-105
c111269_g5	0.00	49.00	0.000	1.816	4.26	8.51e-04	3.22e-02	yes	up	_	_	_	_	_
c84138_g1	0.00	49.00	0.000	4.057	5.38	8.51e-04	3.22e-02	yes	up	_	_	_	_	_
c119602_g5	0.00	49.00	0.000	3.267	5.07	8.51e-04	3.22e-02	yes	up	_	_	_	_	_
c122773_g6	0.00	49.00	0.000	1.195	3.69	8.51e-04	3.22e-02	yes	up	_	_	_	_	_
c128476_g5	0.00	49.00	0.000	2.005	4.40	8.51e-04	3.22e-02	yes	up	_	_	_	_	_
c112286_g2	0.00	49.00	0.000	1.539	4.03	8.51e-04	3.22e-02	yes	up	_	_	_	_	_
c115992_g3	0.00	49.00	0.000	11.179	6.82	8.51e-04	3.22e-02	yes	up	_	_	_	_	_
c113618_g1	0.00	49.00	0.000	2.633	4.77	8.51e-04	3.22e-02	yes	up	_	_	_	_	_
c110475_g4	0.00	49.00	0.000	2.606	4.76	8.51e-04	3.22e-02	yes	up	peptidase M48 [Methanobrevibacter smithii]	_	_	_	_
c108029_g3	0.00	49.00	0.000	1.735	4.20	8.51e-04	3.22e-02	yes	up	_	_	_	_	_
c117543_g1	17625.00	1710.00	1029.787	60.102	-4.10	8.53e-04	3.22e-02	yes	down	PREDICTED: uncharacterized protein LOC101849999 [Aplysia californica]	_	_	_	PF01607.21|CBM_14|Chitin binding Peritrophin-A domain|m.32522:19-64;PF01607.21|CBM_14|Chitin binding Peritrophin-A domain|m.32522:76-126
c116950_g1	156.00	13.00	7.893	0.392	-4.02	8.53e-04	3.22e-02	yes	down	hypothetical protein EMH_0072880 [Eimeria mitis]	_	_	NCOR1, N-CoR	_
c119370_g1	156.00	13.00	15.298	0.776	-4.14	8.53e-04	3.22e-02	yes	down	_	_	_	_	_
c124510_g1	114.00	8.00	12.561	0.547	-4.29	8.53e-04	3.22e-02	yes	down	_	_	_	_	_
c94300_g1	1.00	104.00	0.061	3.591	4.52	8.62e-04	3.25e-02	yes	up	_	_	_	_	_
c128691_g4	211.00	18.00	10.728	0.547	-4.06	8.71e-04	3.28e-02	yes	down	_	_	_	_	_
c90032_g2	2.00	129.00	0.073	2.957	4.14	8.71e-04	3.28e-02	yes	up	PREDICTED: uncharacterized protein LOC101863728 isoform X1 [Aplysia californica]	_	hypothetical protein LOC100210879	ASCL	PF00010.23|HLH|Helix-loop-helix DNA-binding domain|m.67601:98-147
c129942_g2	4.00	206.00	0.086	2.565	3.84	8.71e-04	3.28e-02	yes	up	hypothetical protein LOTGIDRAFT_236952 [Lottia gigantea]	_	_	_	PF01551.19|Peptidase_M23|Peptidase family M23|m.35512:82-176
c122685_g1	90.00	3140.00	1.466	37.966	4.60	8.87e-04	3.33e-02	yes	up	_	_	_	_	PF07686.14|V-set|Immunoglobulin V-set domain|m.50306:29-114
c100511_g1	113.00	9.00	16.422	0.803	-4.19	8.90e-04	3.34e-02	yes	down	hypothetical protein T265_05621 [Opisthorchis viverrini]	RecName: Full=60S ribosomal protein L9 [Mus musculus]	Putative uncharacterized protein	RP-L9e, RPL9	PF00347.20|Ribosomal_L6|Ribosomal protein L6|m.24533:29-101;PF00347.20|Ribosomal_L6|Ribosomal protein L6|m.24533:113-191
c92298_g1	154.00	12.00	7.686	0.358	-4.09	8.94e-04	3.35e-02	yes	down	elongation factor 1-gamma, partial [Clonorchis sinensis]	_	SJCHGC09416 protein	EEF1G	PF00647.16|EF1G|Elongation factor 1 gamma, conserved domain|m.67662:278-381;PF00043.22|GST_C|Glutathione S-transferase, C-terminal domain|m.67662:117-207;PF14497.3|GST_C_3|Glutathione S-transferase, C-terminal domain|m.67662:134-211;PF13410.3|GST_C_2|Glutathione S-transferase, C-terminal domain|m.67662:139-200;PF02798.17|GST_N|Glutathione S-transferase, N-terminal domain|m.67662:28-91
c94812_g1	154.00	13.00	10.594	0.540	-4.06	8.94e-04	3.35e-02	yes	down	hypothetical protein T265_00229 [Opisthorchis viverrini]	RecName: Full=60S acidic ribosomal protein P0; AltName: Full=60S ribosomal protein L10E	Putative uncharacterized protein	RP-LP0, RPLP0	PF00466.17|Ribosomal_L10|Ribosomal protein L10|m.46590:18-116;PF00428.16|Ribosomal_60s|60s Acidic ribosomal protein|m.46590:244-331
c113617_g1	1461.00	141.00	103.823	6.049	-4.08	8.94e-04	3.35e-02	yes	down	_	_	_	_	_
c108174_g1	7631.00	749.00	269.253	15.810	-4.08	8.96e-04	3.35e-02	yes	down	_	_	_	_	PF04089.11|BRICHOS|BRICHOS domain|m.8405:128-201
c113045_g1	3.00	154.00	0.220	6.893	4.45	8.98e-04	3.36e-02	yes	up	_	_	_	_	_
c94477_g1	2.00	128.00	0.049	1.951	3.78	9.01e-04	3.36e-02	yes	up	_	_	_	_	_
c115828_g1	3568.00	350.00	155.851	9.168	-4.07	9.03e-04	3.36e-02	yes	down	_	_	_	_	_
c93145_g1	98.00	7.00	2.713	0.115	-3.71	9.17e-04	3.36e-02	yes	down	hypothetical protein T265_09613 [Opisthorchis viverrini]	RecName: Full=NADP-dependent malic enzyme, mitochondrial; Short=NADP-ME; AltName: Full=Malic enzyme 3; Flags: Precursor [Homo sapiens]	_	E1.1.1.40, maeB	PF03949.12|Malic_M|Malic enzyme, NAD binding domain|m.1109:287-551;PF00390.16|malic|Malic enzyme, N-terminal domain|m.1109:97-276
c78644_g1	27.00	0.00	1.075	0.000	-3.55	9.28e-04	3.36e-02	yes	down	_	_	_	_	_
c103935_g1	27.00	0.00	2.248	0.000	-4.55	9.28e-04	3.36e-02	yes	down	RecName: Full=Echotoxin-2; Short=Echt 2; Flags: Precursor [Monoplex echo]	RecName: Full=Echotoxin-2; Short=Echt 2; Flags: Precursor [Monoplex echo]	_	_	_
c187250_g1	27.00	0.00	3.727	0.000	-5.26	9.28e-04	3.36e-02	yes	down	_	_	_	_	_
c117958_g3	27.00	0.00	2.187	0.000	-4.52	9.28e-04	3.36e-02	yes	down	_	_	_	_	_
c154404_g1	27.00	0.00	1.918	0.000	-4.33	9.28e-04	3.36e-02	yes	down	_	_	_	_	_
c108753_g2	27.00	0.00	3.275	0.000	-5.08	9.28e-04	3.36e-02	yes	down	_	_	_	_	_
c93978_g2	27.00	0.00	4.325	0.000	-5.47	9.28e-04	3.36e-02	yes	down	calcium-binding protein, putative [Schistosoma mansoni]	RecName: Full=20 kDa calcium-binding protein; AltName: Full=Antigen SM20	Clone ZZD1444 mRNA sequence	CALM	PF13499.3|EF-hand_7|EF-hand domain pair|m.13395:39-96;PF13499.3|EF-hand_7|EF-hand domain pair|m.13395:110-172;PF00036.29|EF-hand_1|EF hand|m.13395:147-174;PF13405.3|EF-hand_6|EF-hand domain|m.13395:111-140;PF13833.3|EF-hand_8|EF-hand domain pair|m.13395:124-173;PF13202.3|EF-hand_5|EF hand|m.13395:112-133;PF13202.3|EF-hand_5|EF hand|m.13395:150-172
c74841_g1	27.00	0.00	3.837	0.000	-5.30	9.28e-04	3.36e-02	yes	down	_	_	_	_	_
c127788_g5	27.00	0.00	1.760	0.000	-4.22	9.28e-04	3.36e-02	yes	down	_	_	_	_	_
c107585_g2	27.00	0.00	1.894	0.000	-4.32	9.28e-04	3.36e-02	yes	down	hypothetical protein PTSG_11660 [Salpingoeca rosetta]	_	_	_	_
c135542_g1	27.00	0.00	4.228	0.000	-5.44	9.28e-04	3.36e-02	yes	down	_	_	_	_	_
c120982_g3	27.00	0.00	1.124	0.000	-3.61	9.28e-04	3.36e-02	yes	down	_	_	_	_	_
c164481_g1	27.00	0.00	15.347	0.000	-7.27	9.28e-04	3.36e-02	yes	down	SJCHGC02367 protein [Schistosoma japonicum]	_	_	_	_
c128000_g3	27.00	0.00	2.456	0.000	-4.68	9.28e-04	3.36e-02	yes	down	GTPase IMAP family member 7 [Salmo salar]	_	_	_	PF04548.13|AIG1|AIG1 family|m.67825:90-281;PF01926.20|MMR_HSR1|50S ribosome-binding GTPase|m.67825:90-212
c115131_g2	27.00	0.00	0.513	0.000	-2.62	9.28e-04	3.36e-02	yes	down	PREDICTED: von Willebrand factor D and EGF domain-containing protein-like [Saccoglossus kowalevskii]	_	_	_	PF00094.22|VWD|von Willebrand factor type D domain|m.21025:399-560
c181281_g1	27.00	0.00	2.566	0.000	-4.74	9.28e-04	3.36e-02	yes	down	hypothetical protein LOTGIDRAFT_71188, partial [Lottia gigantea]	RecName: Full=Dorsal-ventral patterning tolloid-like protein 1; AltName: Full=Mini fin protein; Flags: Precursor [Danio rerio]	_	CUBN	PF00431.17|CUB|CUB domain|m.11917:152-262;PF14670.3|FXa_inhibition|Coagulation Factor Xa inhibitory site|m.11917:113-148
c96952_g1	27.00	0.00	3.470	0.000	-5.16	9.28e-04	3.36e-02	yes	down	putative hydrophobin [Flammulina velutipes]	RecName: Full=Fruiting body protein SC3; AltName: Full=Hydrophobin SC3; Flags: Precursor	annotation not available	_	PF01185.15|Hydrophobin|Fungal hydrophobin|m.9189:52-129
c107046_g2	0.00	48.00	0.000	4.469	5.51	9.28e-04	3.36e-02	yes	up	_	_	_	_	_
c105605_g1	0.00	48.00	0.000	1.242	3.75	9.28e-04	3.36e-02	yes	up	_	_	_	_	_
c98521_g2	0.00	48.00	0.000	1.681	4.15	9.28e-04	3.36e-02	yes	up	_	_	_	_	_
c119556_g2	0.00	48.00	0.000	2.991	4.95	9.28e-04	3.36e-02	yes	up	_	_	_	_	PF02023.14|SCAN|SCAN domain|m.43309:158-244
c118597_g1	0.00	48.00	0.000	2.748	4.83	9.28e-04	3.36e-02	yes	up	_	_	_	_	_
c125406_g2	0.00	48.00	0.000	2.768	4.84	9.28e-04	3.36e-02	yes	up	_	_	_	_	_
c92176_g1	0.00	48.00	0.000	2.464	4.68	9.28e-04	3.36e-02	yes	up	PREDICTED: uncharacterized protein LOC101170193 [Oryzias latipes]	_	_	_	PF04548.13|AIG1|AIG1 family|m.43876:1-118
c98266_g2	0.00	48.00	0.000	3.389	5.12	9.28e-04	3.36e-02	yes	up	_	_	_	_	_
c106241_g1	0.00	48.00	0.000	1.067	3.54	9.28e-04	3.36e-02	yes	up	_	_	_	_	_
c102701_g1	0.00	48.00	0.000	1.445	3.95	9.28e-04	3.36e-02	yes	up	_	_	_	_	_
c118708_g1	0.00	48.00	0.000	2.491	4.70	9.28e-04	3.36e-02	yes	up	_	_	_	_	_
c126436_g2	0.00	48.00	0.000	3.605	5.21	9.28e-04	3.36e-02	yes	up	_	_	_	_	_
c123147_g6	0.00	48.00	0.000	0.952	3.40	9.28e-04	3.36e-02	yes	up	_	_	_	_	_
c152987_g1	0.00	48.00	0.000	1.249	3.75	9.28e-04	3.36e-02	yes	up	_	_	_	_	_
c77721_g1	42.00	1.00	24.804	0.385	-5.68	9.32e-04	3.37e-02	yes	down	hypothetical protein T265_12188 [Opisthorchis viverrini]	_	SJCHGC09642 protein	RP-L36e, RPL36	PF01158.15|Ribosomal_L36e|Ribosomal protein L36e|m.54413:19-112
c79520_g1	42.00	1.00	1.735	0.027	-3.85	9.32e-04	3.37e-02	yes	down	severin [Clonorchis sinensis]	RecName: Full=Severin [Echinococcus granulosus]	SJCHGC06031 protein	GSN	PF00626.19|Gelsolin|Gelsolin repeat|m.21560:59-137;PF00626.19|Gelsolin|Gelsolin repeat|m.21560:178-236;PF00626.19|Gelsolin|Gelsolin repeat|m.21560:297-344
c106285_g1	42.00	1.00	1.381	0.020	-3.63	9.32e-04	3.37e-02	yes	down	_	_	_	_	_
c72589_g1	70.00	4.00	30.718	1.127	-4.65	9.33e-04	3.37e-02	yes	down	hypothetical protein T265_04167 [Opisthorchis viverrini]	RecName: Full=60S ribosomal protein L44; AltName: Full=60S ribosomal protein L41	similar to predicted protein	RP-L44e, RPL44	PF00935.16|Ribosomal_L44|Ribosomal protein L44|m.35096:30-105
c123110_g1	70.00	5.00	2.358	0.122	-3.47	9.33e-04	3.37e-02	yes	down	Multiple epidermal growth factor-like domains 10 [Crassostrea gigas]	RecName: Full=Multiple epidermal growth factor-like domains protein 6; Short=Multiple EGF-like domains protein 6; AltName: Full=Epidermal growth factor-like protein	_	_	_
c128668_g1	10.00	402.00	0.122	2.977	3.79	9.38e-04	3.38e-02	yes	up	_	_	_	_	_
c120635_g2	1017.00	99.00	60.935	3.571	-4.06	9.46e-04	3.41e-02	yes	down	hypothetical protein CGI_10009046 [Crassostrea gigas]	_	_	_	PF00386.18|C1q|C1q domain|m.4003:91-213
c94223_g1	8754.00	875.00	650.773	39.006	-4.06	9.49e-04	3.42e-02	yes	down	_	_	_	_	_
c129254_g2	44.00	1540.00	0.696	3.504	2.18	9.51e-04	3.42e-02	yes	up	PREDICTED: E3 ubiquitin-protein ligase RNF213-like, partial [Maylandia zebra]	RecName: Full=E3 ubiquitin-protein ligase RNF213; AltName: Full=ALK lymphoma oligomerization partner on chromosome 17; AltName: Full=Mysterin; AltName: Full=RING	_	_	PF12773.4|DZR|Double zinc ribbon|m.73923:3-51
c122883_g1	3.00	151.00	0.122	3.942	4.19	9.51e-04	3.42e-02	yes	up	_	_	_	_	_
c118625_g1	691.00	67.00	27.468	1.593	-4.03	9.54e-04	3.42e-02	yes	down	hypothetical protein LOTGIDRAFT_200320 [Lottia gigantea]	_	_	MMP28	PF00413.21|Peptidase_M10|Matrixin|m.36021:94-253;PF00045.16|Hemopexin|Hemopexin|m.36021:361-399;PF00045.16|Hemopexin|Hemopexin|m.36021:450-492;PF01471.15|PG_binding_1|Putative peptidoglycan binding domain|m.36021:5-56
c128037_g1	191.00	17.00	4.399	0.236	-3.74	9.64e-04	3.46e-02	yes	down	scavenger receptor cysteine-rich protein precursor [Strongylocentrotus purpuratus]	RecName: Full=Scavenger receptor cysteine-rich domain superfamily protein; Short=ApSRCR1; Flags: Precursor	_	_	PF00530.15|SRCR|Scavenger receptor cysteine-rich domain|m.48721:2-93;PF00530.15|SRCR|Scavenger receptor cysteine-rich domain|m.48721:104-201;PF00530.15|SRCR|Scavenger receptor cysteine-rich domain|m.48721:214-311;PF00530.15|SRCR|Scavenger receptor cysteine-rich domain|m.48721:322-419
c115640_g3	2.00	125.00	0.086	3.220	4.16	9.65e-04	3.46e-02	yes	up	_	_	_	_	_
c113361_g1	69.00	5.00	5.657	0.250	-4.04	9.65e-04	3.46e-02	yes	down	_	_	_	_	_
c31388_g1	68.00	2318.00	3.152	64.456	4.31	9.69e-04	3.47e-02	yes	up	hypothetical protein BRAFLDRAFT_219540 [Branchiostoma floridae]	_	_	_	PF00059.18|Lectin_C|Lectin C-type domain|m.74997:44-152
c105376_g1	1865.00	186.00	221.759	13.495	-4.03	9.75e-04	3.49e-02	yes	down	_	_	_	_	_
c87495_g1	1.00	100.00	0.147	9.087	5.22	9.80e-04	3.50e-02	yes	up	_	_	_	_	_
c112864_g1	1.00	99.00	0.049	2.991	4.37	9.80e-04	3.50e-02	yes	up	_	_	_	_	_
c1045_g1	41.00	1.00	1.515	0.020	-3.75	9.87e-04	3.52e-02	yes	down	hypothetical protein T265_04869 [Opisthorchis viverrini]	_	chaperonin containing TCP1, subunit 7	CCT7	PF00118.21|Cpn60_TCP1|TCP-1/cpn60 chaperonin family|m.39819:29-524
c90397_g1	41.00	2.00	4.888	0.142	-4.37	9.87e-04	3.52e-02	yes	down	_	_	_	_	_
c119485_g1	3268.00	330.00	95.832	5.785	-4.03	9.91e-04	3.53e-02	yes	down	Sialate O-acetylesterase [Crassostrea gigas]	_	_	SIAE	PF03629.15|SASA|Carbohydrate esterase, sialic acid-specific acetylesterase|m.56144:123-389
c98945_g1	109.00	9.00	4.619	0.230	-3.84	9.93e-04	3.53e-02	yes	down	Heterogeneous nuclear ribonucleoprotein K [Schistosoma japonicum]	RecName: Full=Heterogeneous nuclear ribonucleoprotein K; Short=hnRNP K [Gallus gallus]	Clone ZZZ282 mRNA sequence	HNRNPK	PF00013.26|KH_1|KH domain|m.61616:29-87;PF00013.26|KH_1|KH domain|m.61616:138-194;PF07650.14|KH_2|KH domain|m.61616:138-171
c123236_g2	3.00	149.00	0.244	6.933	4.35	1.01e-03	3.55e-02	yes	up	_	_	_	_	_
c120192_g2	3.00	149.00	0.134	3.706	4.02	1.01e-03	3.55e-02	yes	up	_	_	_	_	_
c117271_g1	17791.00	1819.00	685.425	41.963	-4.03	1.01e-03	3.55e-02	yes	down	_	_	_	_	_
c112116_g2	26.00	0.00	7.588	0.000	-6.26	1.01e-03	3.55e-02	yes	down	Matrilin-2 [Crassostrea gigas]	_	_	_	_
c100191_g2	26.00	0.00	20.295	0.000	-7.67	1.01e-03	3.55e-02	yes	down	Chitotriosidase-1 [Crassostrea gigas]	_	_	_	PF01607.21|CBM_14|Chitin binding Peritrophin-A domain|m.62655:62-110
c126770_g6	26.00	0.00	9.384	0.000	-6.57	1.01e-03	3.55e-02	yes	down	_	_	_	_	_
c93263_g1	26.00	0.00	3.324	0.000	-5.10	1.01e-03	3.55e-02	yes	down	_	_	_	_	_
c131198_g1	26.00	0.00	5.059	0.000	-5.69	1.01e-03	3.55e-02	yes	down	_	_	_	_	_
c21840_g1	26.00	0.00	1.747	0.000	-4.21	1.01e-03	3.55e-02	yes	down	_	_	_	_	_
c69491_g1	26.00	0.00	7.075	0.000	-6.16	1.01e-03	3.55e-02	yes	down	small heat shock protein [Moniliophthora roreri MCA 2997]	RecName: Full=Probable Hsp20 family chaperone [Onion yellows phytoplasma OY-M]	annotation not available	HSP20	PF00011.18|HSP20|Hsp20/alpha crystallin family|m.27529:54-150
c89051_g1	26.00	0.00	3.275	0.000	-5.08	1.01e-03	3.55e-02	yes	down	Putative aminopeptidase W07G4.4 [Crassostrea gigas]	_	_	CARP, pepA	_
c104321_g3	26.00	0.00	3.996	0.000	-5.36	1.01e-03	3.55e-02	yes	down	tubulin alpha-3 [Fasciola hepatica]	RecName: Full=Tubulin alpha chain	similar to alpha-tubulin	TUBA	PF03953.14|Tubulin_C|Tubulin C-terminal domain|m.5946:60-188
c102973_g2	26.00	0.00	2.859	0.000	-4.89	1.01e-03	3.55e-02	yes	down	_	_	_	_	PF00041.18|fn3|Fibronectin type III domain|m.51148:99-210
c103570_g1	26.00	0.00	3.372	0.000	-5.12	1.01e-03	3.55e-02	yes	down	_	_	_	_	_
c86271_g3	26.00	0.00	2.798	0.000	-4.86	1.01e-03	3.55e-02	yes	down	_	_	_	_	_
c124578_g1	0.00	47.00	0.000	4.293	5.46	1.01e-03	3.55e-02	yes	up	_	_	_	_	_
c97979_g1	0.00	47.00	0.000	1.890	4.31	1.01e-03	3.55e-02	yes	up	_	_	_	_	_
c102858_g1	0.00	47.00	0.000	2.883	4.90	1.01e-03	3.55e-02	yes	up	_	_	_	_	_
c106398_g1	0.00	47.00	0.000	2.052	4.43	1.01e-03	3.55e-02	yes	up	_	_	_	_	_
c91773_g1	54.00	3.00	13.771	0.479	-4.58	1.02e-03	3.58e-02	yes	down	small subunit ribosomal protein S16e [Clonorchis sinensis]	_	SJCHGC06252 protein	RP-S16e, RPS16	PF00380.16|Ribosomal_S9|Ribosomal protein S9/S16|m.69077:18-150
c105631_g1	333.00	32.00	45.833	2.700	-4.04	1.03e-03	3.58e-02	yes	down	_	_	_	_	_
c112693_g1	372.00	36.00	52.602	3.126	-4.03	1.03e-03	3.59e-02	yes	down	PREDICTED: formin-like protein 5-like [Aplysia californica]	_	_	_	_
c109311_g1	5.00	220.00	0.073	1.796	3.45	1.04e-03	3.61e-02	yes	up	_	_	_	_	_
c122885_g1	515.00	50.00	11.632	0.675	-3.92	1.04e-03	3.63e-02	yes	down	Thrombospondin type-1 domain-containing protein 4 [Camponotus floridanus]	_	_	_	PF01562.16|Pep_M12B_propep|Reprolysin family propeptide|m.44610:84-174;PF13582.3|Reprolysin_3|Metallo-peptidase family M12B Reprolysin-like|m.44610:289-387
c91006_g1	173.00	15.00	25.879	1.377	-4.14	1.04e-03	3.63e-02	yes	down	hypothetical protein T265_03714 [Opisthorchis viverrini]	RecName: Full=60S ribosomal protein L23a [Rattus norvegicus]	Clone ZZD242 mRNA sequence	RP-L23Ae, RPL23A	PF00276.17|Ribosomal_L23|Ribosomal protein L23|m.83:130-194;PF03939.10|Ribosomal_L23eN|Ribosomal protein L23, N-terminal domain|m.83:73-121
c100113_g1	40.00	1.00	3.336	0.047	-4.55	1.05e-03	3.63e-02	yes	down	PREDICTED: protein AIG1-like [Citrus sinensis]	_	_	_	PF04548.13|AIG1|AIG1 family|m.38860:1-195
c110120_g1	40.00	1.00	2.871	0.041	-4.40	1.05e-03	3.63e-02	yes	down	_	_	_	_	_
c9867_g1	40.00	2.00	2.224	0.068	-3.79	1.05e-03	3.63e-02	yes	down	Proliferation-associated protein 2G4 [Schistosoma japonicum]	_	SJCHGC05984 protein	ARX1	PF00557.21|Peptidase_M24|Metallopeptidase family M24|m.65621:27-200
c124399_g1	35.00	1206.00	1.918	38.189	4.25	1.05e-03	3.63e-02	yes	up	_	_	_	_	_
c100326_g2	1154.00	117.00	214.220	13.461	-3.98	1.05e-03	3.65e-02	yes	down	PREDICTED: antistasin-like [Hydra vulgaris]	_	_	_	PF02822.11|Antistasin|Antistasin family|m.39712:2-26;PF02822.11|Antistasin|Antistasin family|m.39712:64-88
c119985_g1	1912.00	195.00	74.498	4.550	-4.00	1.05e-03	3.65e-02	yes	down	hypothetical protein LOTGIDRAFT_230072 [Lottia gigantea]	_	_	_	PF01607.21|CBM_14|Chitin binding Peritrophin-A domain|m.35124:77-120;PF01607.21|CBM_14|Chitin binding Peritrophin-A domain|m.35124:130-176
c121530_g1	107.00	9.00	12.879	0.668	-4.08	1.06e-03	3.67e-02	yes	down	_	_	_	_	_
c110519_g2	15.00	553.00	0.440	9.566	4.16	1.07e-03	3.69e-02	yes	up	FMRFamide receptor [Crassostrea gigas]	_	_	_	PF00001.18|7tm_1|7 transmembrane receptor (rhodopsin family)|m.54118:56-314;PF10324.6|7TM_GPCR_Srw|Serpentine type 7TM GPCR chemoreceptor Srw|m.54118:37-330
c116360_g1	2.00	122.00	0.049	2.005	3.82	1.07e-03	3.69e-02	yes	up	_	_	_	_	_
c118613_g2	67.00	4.00	4.313	0.155	-4.11	1.07e-03	3.69e-02	yes	down	_	_	_	_	_
c79892_g1	67.00	5.00	14.284	0.662	-4.24	1.07e-03	3.69e-02	yes	down	hypothetical protein T265_05776 [Opisthorchis viverrini]	RecName: Full=60S ribosomal protein L24	Putative uncharacterized protein	RP-L24e, RPL24	PF01246.17|Ribosomal_L24e|Ribosomal protein L24e|m.58648:1-66
c119630_g3	67.00	5.00	13.147	0.608	-4.23	1.07e-03	3.69e-02	yes	down	_	_	_	_	PF13855.3|LRR_8|Leucine rich repeat|m.51536:80-128;PF01462.15|LRRNT|Leucine rich repeat N-terminal domain|m.51536:19-48
c70319_g1	67.00	5.00	22.666	1.073	-4.28	1.07e-03	3.69e-02	yes	down	ribosomal protein L30 [Schistosoma japonicum]	RecName: Full=60S ribosomal protein L30 [Branchiostoma belcheri]	Putative uncharacterized protein SJCHGC01242 protein	RP-L30e, RPL30	PF01248.23|Ribosomal_L7Ae|Ribosomal protein L7Ae/L30e/S12e/Gadd45 family|m.22485:41-133
c108645_g1	705.00	71.00	80.436	4.921	-4.00	1.08e-03	3.70e-02	yes	down	_	_	_	_	_
c99297_g1	4.00	193.00	0.477	14.042	4.62	1.09e-03	3.73e-02	yes	up	_	_	_	_	_
c96785_g1	106.00	9.00	4.093	0.209	-3.76	1.09e-03	3.73e-02	yes	down	hypothetical protein T265_08099 [Opisthorchis viverrini]	RecName: Full=Tropomyosin	Tropomyosin; Tropomyosin, in association with the troponin complex, plays a central role in [...]	TPM1	PF00261.17|Tropomyosin|Tropomyosin|m.61393:49-283;PF12718.4|Tropomyosin_1|Tropomyosin like|m.61393:7-152
c100747_g1	508.00	51.00	14.846	0.891	-3.91	1.09e-03	3.74e-02	yes	down	_	_	_	_	_
c103728_g1	0.00	46.00	0.000	4.503	5.52	1.11e-03	3.76e-02	yes	up	_	_	_	_	_
c165153_g1	0.00	46.00	0.000	1.789	4.24	1.11e-03	3.76e-02	yes	up	_	_	_	_	_
c103138_g1	0.00	46.00	0.000	1.357	3.86	1.11e-03	3.76e-02	yes	up	_	_	_	_	_
c85298_g1	0.00	46.00	0.000	1.971	4.37	1.11e-03	3.76e-02	yes	up	_	_	_	_	_
c96290_g1	0.00	46.00	0.000	0.682	2.97	1.11e-03	3.76e-02	yes	up	Tyrosine-protein phosphatase 10D [Crassostrea gigas]	_	_	PTPRB, PTPB	PF00102.24|Y_phosphatase|Protein-tyrosine phosphatase|m.39741:552-782
c22314_g1	0.00	46.00	0.000	1.944	4.35	1.11e-03	3.76e-02	yes	up	_	_	_	_	_
c124712_g2	0.00	46.00	0.000	1.505	4.00	1.11e-03	3.76e-02	yes	up	_	_	_	_	_
c99309_g1	0.00	45.00	0.000	0.999	3.46	1.11e-03	3.76e-02	yes	up	_	_	_	_	_
c73038_g2	0.00	45.00	0.000	3.092	5.00	1.11e-03	3.76e-02	yes	up	_	_	_	_	_
c90310_g1	0.00	45.00	0.000	1.890	4.31	1.11e-03	3.76e-02	yes	up	microneme protein 2, putative [Eimeria praecox]	_	_	HMCN	PF00090.16|TSP_1|Thrombospondin type 1 domain|m.52286:1-22;PF00090.16|TSP_1|Thrombospondin type 1 domain|m.52286:73-123;PF00090.16|TSP_1|Thrombospondin type 1 domain|m.52286:130-184;PF00090.16|TSP_1|Thrombospondin type 1 domain|m.52286:191-244;PF00090.16|TSP_1|Thrombospondin type 1 domain|m.52286:249-290
c115138_g1	0.00	45.00	0.000	1.769	4.22	1.11e-03	3.76e-02	yes	up	_	_	_	_	_
c112238_g3	0.00	45.00	0.000	4.334	5.47	1.11e-03	3.76e-02	yes	up	_	_	_	_	_
c114583_g4	0.00	45.00	0.000	1.809	4.25	1.11e-03	3.76e-02	yes	up	_	_	_	_	_
c95107_g1	105.00	8.00	20.063	0.952	-4.26	1.11e-03	3.76e-02	yes	down	translationally controlled tumor protein [Clonorchis sinensis]	RecName: Full=Translationally-controlled tumor protein homolog; Short=TCTP	_	_	PF00838.14|TCTP|Translationally controlled tumour protein|m.49282:8-172
c79152_g1	105.00	9.00	16.080	0.851	-4.09	1.11e-03	3.76e-02	yes	down	_	_	_	_	_
c105088_g1	2.00	120.00	0.037	1.492	3.54	1.11e-03	3.77e-02	yes	up	PREDICTED: zinc finger MYM-type protein 1-like [Amphimedon queenslandica]	_	_	_	_
c174428_g1	1.00	96.00	0.024	1.364	3.56	1.12e-03	3.78e-02	yes	up	_	_	_	_	_
c114954_g3	1.00	95.00	0.061	4.111	4.71	1.12e-03	3.78e-02	yes	up	_	_	_	_	_
c55718_g1	53.00	3.00	1.955	0.068	-3.61	1.12e-03	3.78e-02	yes	down	putative t-complex protein 1 subunit alpha (TCP-1-alpha) (CCT-alpha) [Schistosoma mansoni]	RecName: Full=T-complex protein 1 subunit alpha; Short=TCP-1-alpha; AltName: Full=CCT-alpha [Schistosoma mansoni]	T-complex protein 1 subunit alpha	CCT1, TCP1	PF00118.21|Cpn60_TCP1|TCP-1/cpn60 chaperonin family|m.20115:39-543
c116405_g1	53.00	3.00	2.260	0.061	-3.87	1.12e-03	3.78e-02	yes	down	_	_	_	_	_
c98992_g1	118.00	10.00	8.297	0.425	-4.00	1.12e-03	3.79e-02	yes	down	hypothetical protein T265_00531 [Opisthorchis viverrini]	_	SJCHGC09365 protein	NAP1L1, NRP	PF00956.15|NAP|Nucleosome assembly protein (NAP)|m.42570:28-222
c121773_g1	208.00	19.00	12.866	0.729	-3.97	1.12e-03	3.79e-02	yes	down	_	_	_	_	_
c117651_g1	1551.00	161.00	64.760	3.888	-4.02	1.13e-03	3.81e-02	yes	down	Chlorophyllase-2 [Crassostrea gigas]	_	_	_	PF12740.4|Chlorophyllase2|Chlorophyllase enzyme|m.71560:49-286;PF07224.8|Chlorophyllase|Chlorophyllase|m.71560:30-305
c110745_g1	553.00	56.00	73.936	4.584	-3.98	1.13e-03	3.82e-02	yes	down	PREDICTED: C-type lectin domain family 4 member G [Alligator sinensis]	RecName: Full=Asialoglycoprotein receptor 1; Short=ASGP-R 1; Short=ASGPR 1; AltName: Full=C-type lectin domain family 4 member H1; AltName: Full=Hepatic lectin H1; S	_	CLEC4G	PF00059.18|Lectin_C|Lectin C-type domain|m.16106:36-142
c126388_g1	284.00	28.00	9.702	0.574	-3.86	1.14e-03	3.82e-02	yes	down	_	_	_	_	_
c114857_g2	627.00	64.00	42.497	3.558	-3.54	1.15e-03	3.85e-02	yes	down	_	_	_	_	_
c124919_g3	2.00	118.00	0.073	1.816	3.47	1.15e-03	3.87e-02	yes	up	_	_	_	_	_
c106175_g1	2.00	118.00	0.073	3.011	4.17	1.15e-03	3.87e-02	yes	up	_	_	_	_	_
c71138_g1	39.00	2.00	4.069	0.128	-4.19	1.18e-03	3.95e-02	yes	down	_	_	_	_	_
c116565_g1	2.00	117.00	0.049	2.316	4.02	1.20e-03	3.97e-02	yes	up	_	_	_	_	_
c58315_g1	65.00	4.00	11.767	0.446	-4.44	1.20e-03	3.97e-02	yes	down	hypothetical protein T265_01421 [Opisthorchis viverrini]	RecName: Full=ATP synthase F(0) complex subunit C1, mitochondrial; AltName: Full=ATP synthase lipid-binding protein; AltName: Full=ATP synthase proteolipid P1; AltNa	ATP synthase lipid-binding protein-like protein	ATPeF0C, ATP5G, ATP9	PF00137.18|ATP-synt_C|ATP synthase subunit C|m.27996:76-138
c87643_g1	65.00	5.00	3.214	0.149	-3.73	1.20e-03	3.97e-02	yes	down	hypothetical protein T265_02762 [Opisthorchis viverrini]	_	Putative uncharacterized protein	TPM1	PF00261.17|Tropomyosin|Tropomyosin|m.65526:58-283;PF12718.4|Tropomyosin_1|Tropomyosin like|m.65526:7-151
c126598_g1	141.00	13.00	2.370	0.135	-3.39	1.20e-03	3.97e-02	yes	down	PREDICTED: uncharacterized protein LOC101862849 isoform X1 [Aplysia californica]	_	_	_	PF00019.17|TGF_beta|Transforming growth factor beta like domain|m.4105:16-68
c114862_g1	2704.00	289.00	153.859	9.870	-3.95	1.20e-03	3.97e-02	yes	down	hypothetical protein LOTGIDRAFT_230072 [Lottia gigantea]	_	_	_	PF00092.25|VWA|von Willebrand factor type A domain|m.39723:202-370
c91346_g1	197.00	6199.00	21.627	414.444	4.25	1.20e-03	3.97e-02	yes	up	_	_	_	_	_
c119896_g4	23.00	787.00	0.538	10.909	4.11	1.21e-03	3.97e-02	yes	up	_	_	_	_	_
c22782_g1	25.00	0.00	3.079	0.000	-4.99	1.22e-03	3.97e-02	yes	down	_	_	_	_	_
c159397_g1	25.00	0.00	2.089	0.000	-4.45	1.22e-03	3.97e-02	yes	down	_	_	_	_	_
c104788_g1	25.00	0.00	2.102	0.000	-4.46	1.22e-03	3.97e-02	yes	down	_	_	_	_	_
c113714_g1	25.00	0.00	1.259	0.000	-3.76	1.22e-03	3.97e-02	yes	down	_	_	_	_	_
c174672_g1	25.00	0.00	1.845	0.000	-4.28	1.22e-03	3.97e-02	yes	down	_	_	_	_	_
c92878_g1	25.00	0.00	2.627	0.000	-4.77	1.22e-03	3.97e-02	yes	down	ferritin heavy-chain [Argas monolakensis]	RecName: Full=Soma ferritin	annotation not available	FTH1	PF00210.21|Ferritin|Ferritin-like domain|m.63292:16-156
c71334_g1	25.00	0.00	5.266	0.000	-5.75	1.22e-03	3.97e-02	yes	down	_	_	_	_	_
c78461_g1	25.00	0.00	3.165	0.000	-5.03	1.22e-03	3.97e-02	yes	down	_	_	_	_	_
c86010_g1	25.00	0.00	2.370	0.000	-4.63	1.22e-03	3.97e-02	yes	down	_	_	_	_	_
c120627_g4	25.00	0.00	3.409	0.000	-5.13	1.22e-03	3.97e-02	yes	down	_	_	_	_	_
c92380_g1	25.00	0.00	1.344	0.000	-3.85	1.22e-03	3.97e-02	yes	down	heat shock cognate 70 [Tetranychus urticae]	_	heat shock protein, putative	HSPA1_8	PF00012.17|HSP70|Hsp70 protein|m.38021:1-409;PF06723.10|MreB_Mbl|MreB/Mbl protein|m.38021:1-204
c110186_g2	25.00	0.00	2.603	0.000	-4.76	1.22e-03	3.97e-02	yes	down	_	_	_	_	_
c98906_g1	25.00	0.00	3.702	0.000	-5.25	1.22e-03	3.97e-02	yes	down	_	_	_	_	_
c105048_g1	25.00	0.00	1.100	0.000	-3.58	1.22e-03	3.97e-02	yes	down	_	_	_	_	_
c110247_g2	0.00	44.00	0.000	6.190	5.97	1.22e-03	3.97e-02	yes	up	_	_	_	_	_
c60769_g1	0.00	44.00	0.000	3.963	5.34	1.22e-03	3.97e-02	yes	up	_	_	_	_	_
c127052_g3	0.00	44.00	0.000	1.539	4.03	1.22e-03	3.97e-02	yes	up	PREDICTED: uncharacterized protein LOC101862849 isoform X1 [Aplysia californica]	_	_	_	_
c69951_g2	0.00	44.00	0.000	7.892	6.32	1.22e-03	3.97e-02	yes	up	_	_	_	_	_
c113163_g1	0.00	44.00	0.000	8.074	6.35	1.22e-03	3.97e-02	yes	up	_	_	_	_	_
c85287_g1	0.00	44.00	0.000	2.613	4.76	1.22e-03	3.97e-02	yes	up	_	_	_	_	_
c78013_g1	0.00	44.00	0.000	1.829	4.27	1.22e-03	3.97e-02	yes	up	_	_	_	_	_
c65861_g2	0.00	44.00	0.000	0.965	3.41	1.22e-03	3.97e-02	yes	up	PREDICTED: uncharacterized protein LOC101859645 [Aplysia californica]	_	_	_	_
c70265_g1	0.00	44.00	0.000	1.492	3.99	1.22e-03	3.97e-02	yes	up	_	_	_	_	_
c97342_g1	0.00	44.00	0.000	1.701	4.17	1.22e-03	3.97e-02	yes	up	_	_	_	_	_
c78506_g1	0.00	44.00	0.000	1.357	3.86	1.22e-03	3.97e-02	yes	up	_	_	_	_	_
c113672_g2	0.00	44.00	0.000	1.222	3.72	1.22e-03	3.97e-02	yes	up	_	_	_	_	_
c106095_g1	1.00	93.00	0.049	2.579	4.17	1.23e-03	3.99e-02	yes	up	_	_	_	_	_
c121608_g2	1.00	93.00	0.024	1.404	3.60	1.23e-03	3.99e-02	yes	up	PREDICTED: uncharacterized protein LOC578054 [Strongylocentrotus purpuratus]	RecName: Full=Gypsy retrotransposon integrase-like protein 1; Short=GIN-1	_	_	PF00665.23|rve|Integrase core domain|m.24456:448-559
c119166_g1	290.00	29.00	12.194	0.682	-3.97	1.23e-03	3.99e-02	yes	down	hypothetical protein LOTGIDRAFT_229551 [Lottia gigantea]	_	_	_	PF04749.14|PLAC8|PLAC8 family|m.18575:23-108
c115584_g2	277.00	27.00	16.446	0.965	-3.96	1.23e-03	3.99e-02	yes	down	_	_	_	_	_
c127659_g4	6483.00	702.00	103.615	6.683	-3.93	1.23e-03	4.01e-02	yes	down	hypothetical protein LOTGIDRAFT_116769, partial [Lottia gigantea]	_	_	_	PF01607.21|CBM_14|Chitin binding Peritrophin-A domain|m.47510:21-73;PF01607.21|CBM_14|Chitin binding Peritrophin-A domain|m.47510:118-171;PF01522.18|Polysacc_deac_1|Polysaccharide deacetylase|m.47510:250-380
c110130_g1	177.00	17.00	13.367	0.776	-3.94	1.24e-03	4.02e-02	yes	down	_	_	_	_	PF00386.18|C1q|C1q domain|m.21721:72-193
c127699_g1	264.00	26.00	20.247	1.148	-4.03	1.24e-03	4.02e-02	yes	down	_	_	_	_	_
c103047_g3	3.00	139.00	0.159	4.253	4.07	1.25e-03	4.04e-02	yes	up	_	_	_	_	_
c112781_g1	3.00	139.00	0.049	1.424	3.35	1.25e-03	4.04e-02	yes	up	_	_	_	_	_
c80976_g1	89.00	7.00	11.009	0.527	-4.15	1.25e-03	4.04e-02	yes	down	hypothetical protein T265_05694 [Opisthorchis viverrini]	_	60S ribosomal protein L13	RP-L13e, RPL13	PF01294.15|Ribosomal_L13e|Ribosomal protein L13e|m.52683:7-186
c104910_g1	176.00	17.00	15.335	0.898	-3.95	1.25e-03	4.05e-02	yes	down	tyrosine 3-monooxygenase/tryptophan 5-monooxygenase activation protein [Clonorchis sinensis]	RecName: Full=14-3-3-like protein 2 [Caenorhabditis elegans]	SJCHGC01759 protein	YWHAB_Q_Z	PF00244.17|14-3-3|14-3-3 protein|m.74832:36-258
c123721_g2	38.00	1.00	22.666	0.385	-5.55	1.26e-03	4.05e-02	yes	down	_	_	_	_	_
c109096_g1	38.00	2.00	9.152	0.304	-4.52	1.26e-03	4.05e-02	yes	down	_	_	_	_	_
c123061_g1	14.00	480.00	0.098	1.937	3.36	1.26e-03	4.07e-02	yes	up	Putative methylcytosine dioxygenase TET2 [Crassostrea gigas]	RecName: Full=Methylcytosine dioxygenase TET2 [Homo sapiens]	_	_	PF12851.4|Tet_JBP|Oxygenase domain of the 2OGFeDO superfamily|m.60110:1363-1979
c107229_g2	5.00	207.00	0.855	22.001	4.53	1.27e-03	4.10e-02	yes	up	Cadherin-87A [Camponotus floridanus]	_	_	FAT4	PF00028.14|Cadherin|Cadherin domain|m.69812:5-85
c127342_g1	31.00	1000.00	0.171	3.288	3.64	1.27e-03	4.10e-02	yes	up	Tenascin-X [Crassostrea gigas]	_	_	_	_
c130478_g1	10.00	365.00	0.110	2.478	3.62	1.28e-03	4.12e-02	yes	up	_	_	_	_	PF00580.18|UvrD-helicase|UvrD/REP helicase N-terminal domain|m.62428:10-79;PF00580.18|UvrD-helicase|UvrD/REP helicase N-terminal domain|m.62428:135-179;PF13604.3|AAA_30|AAA domain|m.62428:5-205;PF13245.3|AAA_19|Part of AAA domain|m.62428:18-76;PF09848.6|DUF2075|Uncharacterized conserved protein (DUF2075)|m.62428:23-190;PF05127.11|Helicase_RecD|Helicase|m.62428:23-150;PF02562.13|PhoH|PhoH-like pro…
c108136_g1	237.00	24.00	11.693	0.709	-3.87	1.28e-03	4.12e-02	yes	down	MGC84749 protein [Xenopus MGC84749 protein [Xenopus laevis]	RecName: Full=60S ribosomal protein L3; AltName: Full=HIV-1 TAR RNA-binding protein B; Short=TARBP-B [Homo sapiens]	SJCHGC06297 protein	RP-L3e, RPL3	PF00297.19|Ribosomal_L3|Ribosomal protein L3|m.26350:13-404
c87706_g1	88.00	7.00	10.459	0.506	-4.12	1.28e-03	4.12e-02	yes	down	Conserved hypothetical protein [Schistosoma japonicum]	_	_	PTGES3	_
c123089_g2	1.00	91.00	0.037	2.039	3.96	1.28e-03	4.12e-02	yes	up	_	_	_	_	_
c86053_g1	1.00	91.00	0.049	2.930	4.35	1.28e-03	4.12e-02	yes	up	_	_	_	_	_
c91897_g1	1.00	91.00	0.024	1.073	3.24	1.28e-03	4.12e-02	yes	up	PREDICTED: uncharacterized protein LOC100369350 [Saccoglossus kowalevskii]	_	_	_	_
c103802_g1	76.00	6.00	21.945	1.094	-4.21	1.29e-03	4.12e-02	yes	down	_	_	_	_	_
c128029_g4	2.00	114.00	10.581	2.586	-1.99	1.29e-03	4.12e-02	yes	down	PREDICTED: poly [ADP-ribose]	_	_	PARP10_14_15	PF00644.17|PARP|Poly(ADP-ribose) polymerase catalytic domain|m.36709:235-418;PF02825.17|WWE|WWE domain|m.36709:143-192
c122314_g2	63.00	4.00	4.069	0.155	-4.03	1.29e-03	4.12e-02	yes	down	_	_	_	_	_
c115040_g1	210.00	21.00	20.222	1.229	-3.93	1.32e-03	4.21e-02	yes	down	hypothetical protein HELRODRAFT_193029 [Helobdella robusta]	_	_	_	PF01607.21|CBM_14|Chitin binding Peritrophin-A domain|m.23454:45-91
c100303_g1	37.00	1.00	1.833	0.027	-3.93	1.34e-03	4.21e-02	yes	down	_	_	_	_	_
c83779_g1	37.00	2.00	8.431	0.284	-4.47	1.34e-03	4.21e-02	yes	down	_	_	_	_	_
c55748_g1	37.00	2.00	2.725	0.088	-3.91	1.34e-03	4.21e-02	yes	down	translocon-associated protein subunit alpha [Clonorchis sinensis]	_	SJCHGC01749 protein	SSR1	PF03896.13|TRAP_alpha|Translocon-associated protein (TRAP), alpha subunit|m.42589:31-231
c107698_g4	24.00	0.00	10.129	0.000	-6.68	1.34e-03	4.21e-02	yes	down	_	_	_	_	_
c130970_g4	24.00	0.00	8.382	0.000	-6.41	1.34e-03	4.21e-02	yes	down	_	_	_	_	_
c80344_g1	24.00	0.00	3.116	0.000	-5.01	1.34e-03	4.21e-02	yes	down	_	_	_	_	_
c110957_g1	24.00	0.00	1.540	0.000	-4.04	1.34e-03	4.21e-02	yes	down	Putative aminopeptidase W07G4.4 [Crassostrea gigas]	RecName: Full=Putative aminopeptidase W07G4.4 [Caenorhabditis elegans]	_	CARP, pepA	PF00883.18|Peptidase_M17|Cytosol aminopeptidase family, catalytic domain|m.24743:173-341
c78779_g1	24.00	0.00	2.920	0.000	-4.92	1.34e-03	4.21e-02	yes	down	_	_	_	_	_
c108193_g1	24.00	0.00	3.397	0.000	-5.13	1.34e-03	4.21e-02	yes	down	PREDICTED: uncharacterized protein LOC100368311 [Saccoglossus kowalevskii]	_	_	PARP10_14_15	PF01661.18|Macro|Macro domain|m.47635:89-207
c96195_g2	24.00	0.00	1.686	0.000	-4.16	1.34e-03	4.21e-02	yes	down	_	_	_	_	_
c115793_g3	24.00	0.00	1.417	0.000	-3.92	1.34e-03	4.21e-02	yes	down	_	_	_	_	_
c85240_g1	24.00	0.00	1.356	0.000	-3.86	1.34e-03	4.21e-02	yes	down	glyceraldehyde-3-phosphate dehydrogenase C subunit [Gossypium hirsutum]	RecName: Full=Glyceraldehyde-3-phosphate dehydrogenase 2, cytosolic [Oryza sativa Japonica Group]	glyceraldehyde-3-phosphate dehydrogenase, putative, expressed	GAPDH, gapA	PF02800.17|Gp_dh_C|Glyceraldehyde 3-phosphate dehydrogenase, C-terminal domain|m.3517:159-316;PF00044.21|Gp_dh_N|Glyceraldehyde 3-phosphate dehydrogenase, NAD binding domain|m.3517:4-154
c126953_g2	24.00	0.00	2.077	0.000	-4.44	1.34e-03	4.21e-02	yes	down	_	_	_	_	_
c104842_g1	24.00	0.00	1.259	0.000	-3.76	1.34e-03	4.21e-02	yes	down	Multiple epidermal growth factor-like domains 11 [Crassostrea gigas]	RecName: Full=Multiple epidermal growth factor-like domains protein 11; Short=Multiple EGF-like domains protein 11; Flags: Precursor [Mus musculus]	_	_	_
c90087_g1	24.00	0.00	3.653	0.000	-5.23	1.34e-03	4.21e-02	yes	down	Elongation factor 1-alpha, putative, expressed [Oryza sativa Japonica Group]	_	elongation factor Tu, putative	EEF1A	PF00009.24|GTP_EFTU|Elongation factor Tu GTP binding domain|m.51134:5-222
c165264_g1	0.00	43.00	0.000	1.559	4.05	1.34e-03	4.21e-02	yes	up	uncharacterized protein LOC100273196 [Zea mays]	_	hypothetical protein	ALDO	PF00274.16|Glycolytic|Fructose-bisphosphate aldolase class-I|m.69814:1-271
c99728_g1	0.00	43.00	0.000	0.959	3.40	1.34e-03	4.21e-02	yes	up	_	_	_	_	_
c104998_g1	0.00	43.00	0.000	1.991	4.39	1.34e-03	4.21e-02	yes	up	_	_	_	_	_
c111695_g1	0.00	43.00	0.000	1.418	3.92	1.34e-03	4.21e-02	yes	up	_	_	_	_	_
c113783_g4	0.00	43.00	0.000	3.348	5.11	1.34e-03	4.21e-02	yes	up	_	_	_	_	_
c90498_g2	0.00	43.00	0.000	1.627	4.11	1.34e-03	4.21e-02	yes	up	_	_	_	_	_
c99969_g1	0.00	43.00	0.000	1.377	3.88	1.34e-03	4.21e-02	yes	up	ATP-binding cassette sub-family C member 1 [Cyphoma gibbosum]	_	_	ABCC1	PF00664.20|ABC_membrane|ABC transporter transmembrane region|m.41808:356-443
c128500_g2	0.00	43.00	0.000	2.160	4.50	1.34e-03	4.21e-02	yes	up	_	_	_	_	_
c81373_g1	0.00	43.00	0.000	2.754	4.83	1.34e-03	4.21e-02	yes	up	_	_	_	_	_
c111074_g2	6.00	226.00	0.208	4.780	3.99	1.34e-03	4.21e-02	yes	up	Tryptase [Crassostrea gigas]	_	_	_	PF00651.28|BTB|BTB/POZ domain|m.41024:16-119
c50716_g1	50.00	3.00	22.470	0.864	-4.55	1.35e-03	4.22e-02	yes	down	large subunit ribosomal protein L40e [Clonorchis sinensis]	RecName: Full=Ubiquitin-60S ribosomal protein L40; AltName: Full=CEP52; Contains: RecName: Full=Ubiquitin; Contains: RecName: Full=60S ribosomal protein L40; Flags	GH10063	RP-L40e, RPL40	PF00240.20|ubiquitin|Ubiquitin family|m.6745:2-73;PF01020.14|Ribosomal_L40e|Ribosomal L40e family|m.6745:77-126;PF11976.5|Rad60-SLD|Ubiquitin-2 like Rad60 SUMO-like|m.6745:1-70;PF14560.3|Ubiquitin_2|Ubiquitin-like domain|m.6745:11-68
c90495_g1	512.00	54.00	39.711	2.538	-3.92	1.35e-03	4.22e-02	yes	down	_	_	_	_	_
c119453_g2	16.00	537.00	0.672	13.974	4.19	1.35e-03	4.22e-02	yes	up	_	_	_	_	_
c100469_g1	12062.00	1348.00	1142.017	77.438	-3.88	1.35e-03	4.23e-02	yes	down	_	_	_	_	_
c108178_g1	5.00	203.00	0.672	17.586	4.52	1.36e-03	4.23e-02	yes	up	_	_	_	_	_
c107989_g1	196.00	19.00	10.484	0.614	-3.89	1.36e-03	4.24e-02	yes	down	hypothetical protein LOTGIDRAFT_174500 [Lottia gigantea]	_	_	_	_
c97533_g1	208.00	21.00	23.961	1.472	-3.94	1.36e-03	4.26e-02	yes	down	PREDICTED: brevican core protein-like [Aplysia californica]	_	_	_	PF00059.18|Lectin_C|Lectin C-type domain|m.26383:46-160
c128272_g2	4.00	179.00	0.110	3.024	3.89	1.37e-03	4.27e-02	yes	up	_	_	_	_	_
c123098_g1	2579.00	287.00	48.729	3.234	-3.87	1.38e-03	4.30e-02	yes	down	hypothetical protein LOTGIDRAFT_166196 [Lottia gigantea]	RecName: Full=Putative tyrosinase-like protein tyr-3; Flags: Precursor [Caenorhabditis elegans]	_	TYR	PF00264.17|Tyrosinase|Common central domain of tyrosinase|m.2446:143-242;PF00264.17|Tyrosinase|Common central domain of tyrosinase|m.2446:275-321;PF01607.21|CBM_14|Chitin binding Peritrophin-A domain|m.2446:712-748
c91730_g1	62.00	4.00	11.803	0.473	-4.38	1.39e-03	4.32e-02	yes	down	putative 60s ribosomal protein L21 [Schistosoma mansoni]	RecName: Full=60S ribosomal protein L21 [Homo sapiens]	SJCHGC00639 protein	RP-L21e, RPL21	PF01157.15|Ribosomal_L21e|Ribosomal protein L21e|m.59521:3-99
c54298_g1	62.00	4.00	1.711	0.068	-3.43	1.39e-03	4.32e-02	yes	down	SJCHGC09453 protein [Schistosoma japonicum]	RecName: Full=Transitional endoplasmic reticulum ATPase; Short=TER ATPase; AltName: Full=15S Mg(2+)-ATPase p97 subunit; Short=p97; AltName: Full=Valosin-containing	SJCHGC09453 protein	VCP, CDC48	PF00004.26|AAA|ATPase family associated with various cellular activities (AAA)|m.23151:249-378;PF00004.26|AAA|ATPase family associated with various cellular activities (AAA)|m.23151:522-655;PF02359.15|CDC48_N|Cell division protein 48 (CDC48), N-terminal domain|m.23151:33-113;PF05496.9|RuvB_N|Holliday junction DNA helicase ruvB N-terminus|m.23151:249-322;PF05496.9|RuvB_N|Holliday junction DNA heli…
c93320_g1	62.00	5.00	7.954	0.392	-4.03	1.39e-03	4.32e-02	yes	down	hypothetical protein T265_13033, partial [Opisthorchis viverrini]	RecName: Full=Nascent polypeptide-associated complex subunit alpha; Short=NAC-alpha; AltName: Full=Alpha-NAC [Aspergillus nidulans FGSC A4]	SJCHGC09320 protein	EGD2, NACA	PF01849.15|NAC|NAC domain|m.13762:65-121
c104474_g1	11447.00	1292.00	979.507	66.934	-3.87	1.40e-03	4.34e-02	yes	down	hypothetical protein LOTGIDRAFT_234762 [Lottia gigantea]	_	_	_	_
c116083_g2	206.00	21.00	23.008	1.431	-3.92	1.41e-03	4.38e-02	yes	down	Actin-2 [Schistosoma japonicum]	RecName: Full=Actin-2 [Schistosoma mansoni]	Actin Putative uncharacterized protein; Actins are highly conserved proteins that are involv [...]	ACTB_G1	PF00022.16|Actin|Actin|m.75388:8-247
c111721_g1	3.00	134.00	0.122	2.457	3.53	1.42e-03	4.39e-02	yes	up	_	_	_	_	_
c122193_g1	229.00	24.00	7.099	0.446	-3.72	1.42e-03	4.40e-02	yes	down	_	_	_	_	_
c127904_g1	217.00	22.00	44.965	2.835	-3.94	1.43e-03	4.43e-02	yes	down	_	_	_	_	_
c107100_g1	157.00	15.00	6.293	0.358	-3.80	1.44e-03	4.44e-02	yes	down	troponin I 4 [Clonorchis sinensis]	_	Putative uncharacterized protein	_	PF00992.17|Troponin|Troponin|m.38728:82-211
c116986_g1	169.00	16.00	2.236	0.128	-3.36	1.44e-03	4.44e-02	yes	down	collagen type I/II/III/V/XI alpha [Clonorchis sinensis]	RecName: Full=Collagen alpha-1(I) chain; AltName: Full=Alpha-1 type I collagen; Flags: Precursor [Canis lupus familiaris]	_	COL1A	PF01391.15|Collagen|Collagen triple helix repeat (20 copies)|m.19003:62-120;PF01391.15|Collagen|Collagen triple helix repeat (20 copies)|m.19003:596-654;PF01391.15|Collagen|Collagen triple helix repeat (20 copies)|m.19003:670-727;PF01391.15|Collagen|Collagen triple helix repeat (20 copies)|m.19003:1021-1078;PF01410.15|COLFI|Fibrillar collagen C-terminal domain|m.19003:1110-1299
c86828_g1	2.00	110.00	0.049	1.674	3.57	1.45e-03	4.44e-02	yes	up	_	_	_	_	_
c117327_g3	2.00	110.00	0.159	5.401	4.41	1.45e-03	4.44e-02	yes	up	_	_	_	_	_
c117973_g1	725.00	80.00	24.865	1.640	-3.84	1.46e-03	4.44e-02	yes	down	Acidic mammalian chitinase [Crassostrea gigas]	_	_	E3.2.1.14	PF00704.25|Glyco_hydro_18|Glycosyl hydrolases family 18|m.49737:73-409
c84892_g1	73.00	6.00	5.767	0.284	-3.93	1.46e-03	4.44e-02	yes	down	tetraspanin 2B [Opisthorchis viverrini]	_	_	CD63, MLA1, TSPAN30	PF00335.17|Tetraspannin|Tetraspanin family|m.36617:19-219
c118278_g1	297.00	32.00	17.338	0.736	-4.38	1.48e-03	4.44e-02	yes	down	_	_	_	_	_
c127694_g1	297.00	32.00	6.122	0.392	-3.66	1.48e-03	4.44e-02	yes	down	PREDICTED: cadherin EGF LAG seven-pass G-type receptor 1-like [Aplysia californica]	_	_	_	_
c94567_g1	23.00	0.00	1.735	0.000	-4.20	1.48e-03	4.44e-02	yes	down	_	_	_	_	PF00629.20|MAM|MAM domain, meprin/A5/mu|m.43743:55-146
c112649_g7	23.00	0.00	6.256	0.000	-5.99	1.48e-03	4.44e-02	yes	down	_	_	_	_	_
c111920_g1	23.00	0.00	3.470	0.000	-5.16	1.48e-03	4.44e-02	yes	down	_	_	_	_	_
c67244_g1	23.00	0.00	49.315	0.000	-8.95	1.48e-03	4.44e-02	yes	down	SJCHGC01650 protein [Schistosoma ribosomal protein L38 [Schistosoma japonicum]	_	SJCHGC01650 protein	RP-L38e, RPL38	_
c73390_g1	23.00	0.00	22.849	0.000	-7.84	1.48e-03	4.44e-02	yes	down	PREDICTED: uncharacterized protein LOC763311 [Strongylocentrotus purpuratus]	_	_	_	_
c73307_g2	23.00	0.00	1.405	0.000	-3.91	1.48e-03	4.44e-02	yes	down	PREDICTED: short/branched chain specific acyl-CoA dehydrogenase, mitochondrial-like [Oryzias latipes]	RecName: Full=Short/branched chain specific acyl-CoA dehydrogenase, mitochondrial; Short=SBCAD; AltName: Full=2-methyl branched chain acyl-CoA dehydrogenase; Short	acyl-Coenzyme A dehydrogenase, short/branched chain	ACADSB	PF02770.16|Acyl-CoA_dh_M|Acyl-CoA dehydrogenase, middle domain|m.18659:161-256;PF02771.13|Acyl-CoA_dh_N|Acyl-CoA dehydrogenase, N-terminal domain|m.18659:46-156
c106580_g1	23.00	0.00	1.161	0.000	-3.66	1.48e-03	4.44e-02	yes	down	_	_	_	_	_
c89845_g1	23.00	0.00	29.789	0.000	-8.22	1.48e-03	4.44e-02	yes	down	hypothetical protein, partial [Rhodospirillum photometricum]	_	_	_	_
c108015_g1	23.00	0.00	1.197	0.000	-3.70	1.48e-03	4.44e-02	yes	down	_	_	_	_	_
c142912_g1	23.00	0.00	3.372	0.000	-5.12	1.48e-03	4.44e-02	yes	down	hypothetical protein TRAVEDRAFT_27946 [Trametes versicolor FP-101664 SS1]	_	_	_	_
c114113_g1	23.00	0.00	1.197	0.000	-3.70	1.48e-03	4.44e-02	yes	down	hypothetical protein CAPTEDRAFT_109203 [Capitella teleta]	RecName: Full=Transmembrane matrix receptor MUP-4; AltName: Full=Muscle-positioning protein 4; Flags: Precursor [Caenorhabditis elegans]	_	COL12A	PF00092.25|VWA|von Willebrand factor type A domain|m.13078:43-214;PF13519.3|VWA_2|von Willebrand factor type A domain|m.13078:46-154
c85660_g1	23.00	0.00	11.119	0.000	-6.81	1.48e-03	4.44e-02	yes	down	_	_	_	_	_
c102721_g1	23.00	0.00	7.588	0.000	-6.26	1.48e-03	4.44e-02	yes	down	_	_	_	_	_
c123057_g2	23.00	0.00	2.358	0.000	-4.62	1.48e-03	4.44e-02	yes	down	_	_	_	_	_
c190887_g1	23.00	0.00	3.727	0.000	-5.26	1.48e-03	4.44e-02	yes	down	_	_	_	_	_
c114191_g2	0.00	42.00	0.000	1.748	4.21	1.48e-03	4.44e-02	yes	up	_	_	_	_	_
c165925_g1	0.00	42.00	0.000	1.316	3.82	1.48e-03	4.44e-02	yes	up	_	_	_	_	_
c106758_g1	0.00	42.00	0.000	1.472	3.97	1.48e-03	4.44e-02	yes	up	_	_	_	_	_
c103255_g1	0.00	42.00	0.000	1.802	4.25	1.48e-03	4.44e-02	yes	up	_	_	_	_	_
c113240_g2	0.00	42.00	0.000	1.350	3.86	1.48e-03	4.44e-02	yes	up	_	_	_	_	_
c122793_g3	0.00	42.00	0.000	1.492	3.99	1.48e-03	4.44e-02	yes	up	_	_	_	_	_
c95964_g3	0.00	41.00	0.000	1.188	3.69	1.48e-03	4.44e-02	yes	up	_	_	_	_	_
c70813_g1	0.00	41.00	0.000	1.215	3.72	1.48e-03	4.44e-02	yes	up	phosphoenolpyruvate carboxylase [Zea mays]	RecName: Full=Phosphoenolpyruvate carboxylase 1; Short=PEPC 1; Short=PEPCase 1 [Zea mays]	_	ppc	PF00311.14|PEPcase|Phosphoenolpyruvate carboxylase|m.47347:1-357
c74052_g1	0.00	41.00	0.000	1.661	4.14	1.48e-03	4.44e-02	yes	up	_	_	_	_	_
c23891_g1	0.00	41.00	0.000	1.289	3.80	1.48e-03	4.44e-02	yes	up	_	_	_	_	_
c56887_g1	0.00	41.00	0.000	2.430	4.66	1.48e-03	4.44e-02	yes	up	LOC100285704 [Zea mays]	RecName: Full=Abscisic stress-ripening protein 1	_	_	PF02496.13|ABA_WDS|ABA/WDS induced protein|m.73991:85-160
c54455_g1	0.00	41.00	0.000	1.181	3.68	1.48e-03	4.44e-02	yes	up	_	_	_	_	_
c7995_g1	0.00	41.00	0.000	2.153	4.49	1.48e-03	4.44e-02	yes	up	_	_	_	_	_
c69137_g1	0.00	41.00	0.000	2.302	4.59	1.48e-03	4.44e-02	yes	up	_	_	_	_	_
c97454_g1	0.00	41.00	0.000	4.023	5.37	1.48e-03	4.44e-02	yes	up	hypothetical protein M513_03047 [Trichuris suis]	RecName: Full=Uncharacterized histidine-rich protein DDB_G0274557; Flags: Precursor [Dictyostelium discoideum]	_	_	_
c105905_g2	0.00	41.00	0.000	1.870	4.30	1.48e-03	4.44e-02	yes	up	_	_	_	_	_
c128525_g3	0.00	41.00	0.000	7.520	6.25	1.48e-03	4.44e-02	yes	up	_	_	_	_	_
c108483_g1	0.00	41.00	0.000	3.396	5.13	1.48e-03	4.44e-02	yes	up	_	_	_	_	_
c126751_g2	308.00	33.00	16.947	1.094	-3.84	1.49e-03	4.47e-02	yes	down	_	_	_	_	_
c123078_g1	1400.00	159.00	45.967	3.018	-3.89	1.50e-03	4.49e-02	yes	down	PREDICTED: von Willebrand factor C domain-containing protein 2-like [Ciona intestinalis]	RecName: Full=Brorin; AltName: Full=Brain-specific chordin-like protein; AltName: Full=CR (chordin-like cysteine-rich) domain-containing adhesive protein; Short=Cra	_	_	_
c73643_g1	2.00	109.00	0.941	32.789	4.98	1.50e-03	4.50e-02	yes	up	_	_	_	_	_
c84227_g1	2.00	109.00	0.037	1.242	3.29	1.50e-03	4.50e-02	yes	up	PREDICTED: uncharacterized protein LOC101859645 [Aplysia californica]	RecName: Full=Putative inactive phenolphthiocerol synthesis polyketide synthase type I Pks1 [Mycobacterium tuberculosis H37Rv]	_	_	PF08659.7|KR|KR domain|m.14402:81-259;PF00668.17|Condensation|Condensation domain|m.14402:476-761;PF00550.22|PP-binding|Phosphopantetheine attachment site|m.14402:368-433;PF00106.22|adh_short|short chain dehydrogenase|m.14402:83-242;PF13561.3|adh_short_C2|Enoyl-(Acyl carrier protein) reductase|m.14402:89-232
c70563_g1	155.00	15.00	18.096	1.067	-3.96	1.50e-03	4.50e-02	yes	down	SJCHGC01952 protein [Schistosoma ribosomal protein S8 [Schistosoma japonicum]	RecName: Full=40S ribosomal protein S8	Ribosomal protein S8	RP-S8e, RPS8	PF01201.19|Ribosomal_S8e|Ribosomal protein S8e|m.2183:10-209
c101361_g3	72.00	6.00	9.384	0.479	-4.03	1.51e-03	4.52e-02	yes	down	_	_	_	_	_
c130032_g1	5.00	196.00	0.073	1.991	3.60	1.51e-03	4.52e-02	yes	up	_	_	_	_	_
c103710_g2	36.00	2.00	1.564	0.054	-3.43	1.52e-03	4.54e-02	yes	down	_	_	_	_	_
c129577_g1	410.00	45.00	3.886	0.257	-3.48	1.54e-03	4.59e-02	yes	down	PREDICTED: zonadhesin-like [Aplysia californica]	_	_	_	PF00094.22|VWD|von Willebrand factor type D domain|m.69093:1513-1668
c124049_g3	17.00	537.00	0.904	6.386	2.69	1.54e-03	4.59e-02	yes	up	hypothetical protein T265_09208 [Opisthorchis viverrini]	_	_	_	PF00057.15|Ldl_recept_a|Low-density lipoprotein receptor domain class A|m.33820:41-75
c122110_g1	9528.00	1107.00	462.811	32.080	-3.85	1.54e-03	4.60e-02	yes	down	PREDICTED: complement C1q-like protein 2-like [Oreochromis niloticus]	_	_	_	PF00386.18|C1q|C1q domain|m.11853:43-169
c91179_g1	95.00	9.00	2.823	0.162	-3.48	1.55e-03	4.62e-02	yes	down	hypothetical protein T265_07011 [Opisthorchis viverrini]	RecName: Full=Stress-70 protein, mitochondrial; AltName: Full=75 kDa glucose-regulated protein; Short=GRP-75; AltName: Full=Heat shock 70 kDa protein 9; AltName: F	SJCHGC06312 protein	dnaK	PF00012.17|HSP70|Hsp70 protein|m.12690:45-642;PF06723.10|MreB_Mbl|MreB/Mbl protein|m.12690:174-412
c110828_g1	1.00	86.00	0.037	2.221	4.08	1.56e-03	4.63e-02	yes	up	_	_	_	_	_
c116123_g1	1.00	86.00	0.318	2.883	2.84	1.56e-03	4.63e-02	yes	up	_	_	_	_	_
c90016_g1	48.00	3.00	9.531	0.371	-4.35	1.56e-03	4.63e-02	yes	down	phosphoenolpyruvate carboxykinase 2, partial [Clonorchis sinensis]	_	_	E4.1.1.32, pckA, PEPCK	PF00821.15|PEPCK|Phosphoenolpyruvate carboxykinase|m.65092:1-107
c117625_g6	2.00	108.00	0.098	4.084	4.40	1.56e-03	4.64e-02	yes	up	PREDICTED: multiple epidermal growth factor-like domains protein 11-like, partial [Aplysia californica]	RecName: Full=Neurogenic locus notch homolog protein 1; Short=Notch 1; Contains: RecName: Full=Notch 1 extracellular truncation; Short=NEXT; Contains: RecName: Full	_	FBLN1_2	PF07645.12|EGF_CA|Calcium-binding EGF domain|m.59804:14-51;PF07645.12|EGF_CA|Calcium-binding EGF domain|m.59804:101-145;PF07645.12|EGF_CA|Calcium-binding EGF domain|m.59804:188-232;PF07645.12|EGF_CA|Calcium-binding EGF domain|m.59804:275-319;PF07645.12|EGF_CA|Calcium-binding EGF domain|m.59804:362-399;PF00053.21|Laminin_EGF|Laminin EGF domain|m.59804:245-274;PF00053.21|Laminin_EGF|Laminin EGF dom…
c128934_g2	164.00	17.00	4.704	0.290	-3.62	1.57e-03	4.65e-02	yes	down	hypothetical protein LOTGIDRAFT_228625 [Lottia gigantea]	_	_	_	_
c124970_g3	70.00	2056.00	1.760	30.871	4.06	1.59e-03	4.70e-02	yes	up	_	_	_	_	_
c126145_g2	94.00	9.00	3.152	0.182	-3.53	1.59e-03	4.71e-02	yes	down	PREDICTED: uncharacterized protein LOC101855176 [Aplysia californica]	RecName: Full=EGF-like and EMI domain-containing protein 1; Flags: Precursor [Mus musculus]	_	PROS1	PF00094.22|VWD|von Willebrand factor type D domain|m.34193:56-120;PF07645.12|EGF_CA|Calcium-binding EGF domain|m.34193:405-438;PF07645.12|EGF_CA|Calcium-binding EGF domain|m.34194:8-39;PF07645.12|EGF_CA|Calcium-binding EGF domain|m.34194:95-132
c100064_g2	129.00	12.00	8.052	0.452	-3.88	1.59e-03	4.71e-02	yes	down	hypothetical protein T265_09499 [Opisthorchis viverrini]	RecName: Full=Actin, cytoplasmic 1; AltName: Full=Beta-actin; AltName: Full=OlCA1; Contains: RecName: Full=Actin, cytoplasmic 1, N-terminally processed [Oryzias lat	Actin, cytoplasmic 1 (Beta-actin) (OlCA1); Actins are highly conserved proteins that are inv [...]	ACTB_G1	PF00022.16|Actin|Actin|m.57661:4-358
c106704_g1	1521.00	176.00	58.968	4.017	-3.84	1.60e-03	4.73e-02	yes	down	_	_	_	_	_
c122455_g2	8.00	277.00	0.684	14.447	4.21	1.60e-03	4.73e-02	yes	up	_	_	_	_	_
c795_g1	35.00	1.00	1.369	0.020	-3.61	1.62e-03	4.77e-02	yes	down	hypothetical protein T265_08579 [Opisthorchis viverrini]	RecName: Full=Collagen alpha-1(II) chain; AltName: Full=Alpha-1 type II collagen; Flags: Precursor [Xenopus (Silurana) tropicalis]	SJCHGC09290 protein	COL5AS	PF01410.15|COLFI|Fibrillar collagen C-terminal domain|m.48147:209-378;PF01391.15|Collagen|Collagen triple helix repeat (20 copies)|m.48147:2-59
c102882_g1	35.00	1.00	1.869	0.034	-3.88	1.62e-03	4.77e-02	yes	down	_	_	_	_	_
c87665_g1	35.00	1.00	4.655	0.081	-4.72	1.62e-03	4.77e-02	yes	down	_	_	_	_	_
c95855_g1	35.00	1.00	3.214	0.054	-4.43	1.62e-03	4.77e-02	yes	down	similar to GenBank Accession Number Z29075 myophilin antigen in Echinococcus granulosus [Schistosoma myophilin-like protein [Echinococ	RecName: Full=Myophilin	Clone ZZZ59 mRNA sequence	_	PF00307.28|CH|Calponin homology (CH) domain|m.121:38-143;PF00402.15|Calponin|Calponin family repeat|m.121:178-200
c55749_g1	35.00	2.00	1.686	0.061	-3.47	1.62e-03	4.77e-02	yes	down	mitochondrial malate dehydrogenase [Clonorchis sinensis]	RecName: Full=Malate dehydrogenase, mitochondrial; Flags: Precursor [Pongo abelii]	Malate dehydrogenase (EC 1.1.1.37)	MDH2	PF02866.15|Ldh_1_C|lactate/malate dehydrogenase, alpha/beta C-terminal domain|m.33037:171-334;PF00056.20|Ldh_1_N|lactate/malate dehydrogenase, NAD binding domain|m.33037:27-169
c48407_g1	35.00	2.00	1.381	0.047	-3.33	1.62e-03	4.77e-02	yes	down	taurocyamine kinase [Fasciola sp. TA-2014]	RecName: Full=Taurocyamine kinase; AltName: Full=ATP:guanidino kinase Smc74; AltName: Full=ATP:guanidino phosphotransferase; Short=SmGK	_	E2.7.3.2	PF00217.16|ATP-gua_Ptrans|ATP:guanido phosphotransferase, C-terminal catalytic domain|m.8211:78-318;PF00217.16|ATP-gua_Ptrans|ATP:guanido phosphotransferase, C-terminal catalytic domain|m.8211:440-525;PF02807.12|ATP-gua_PtransN|ATP:guanido phosphotransferase, N-terminal domain|m.8211:3-52;PF02807.12|ATP-gua_PtransN|ATP:guanido phosphotransferase, N-terminal domain|m.8211:348-415
c97909_g1	151.00	15.00	15.493	0.938	-3.91	1.63e-03	4.77e-02	yes	down	hypothetical protein T265_06130 [Opisthorchis viverrini]	RecName: Full=60S ribosomal protein L6	SJCHGC01683 protein	RP-L6e, RPL6	PF01159.16|Ribosomal_L6e|Ribosomal protein L6e|m.14689:142-252
c87444_g1	59.00	4.00	1.882	0.074	-3.51	1.63e-03	4.77e-02	yes	down	hypothetical protein CLF_103390 [Clonorchis sinensis]	_	_	_	_
c111500_g1	59.00	4.00	7.197	0.297	-4.20	1.63e-03	4.77e-02	yes	down	_	_	_	_	_
c96498_g1	59.00	5.00	2.419	0.122	-3.50	1.63e-03	4.77e-02	yes	down	hypothetical protein T265_13906, partial [Opisthorchis viverrini]	_	hypothetical protein	CCT3, TRIC5	PF00118.21|Cpn60_TCP1|TCP-1/cpn60 chaperonin family|m.68758:31-511
c114325_g2	0.00	40.00	0.000	1.424	3.93	1.64e-03	4.77e-02	yes	up	_	_	_	_	_
c94943_g1	0.00	40.00	0.000	2.397	4.64	1.64e-03	4.77e-02	yes	up	_	_	_	_	_
c106802_g1	0.00	40.00	0.000	1.337	3.84	1.64e-03	4.77e-02	yes	up	_	_	_	_	_
c101207_g1	0.00	40.00	0.000	2.322	4.60	1.64e-03	4.77e-02	yes	up	_	_	_	_	_
c99254_g1	0.00	40.00	0.000	1.330	3.84	1.64e-03	4.77e-02	yes	up	_	_	_	_	_
c95773_g3	0.00	40.00	0.000	2.099	4.46	1.64e-03	4.77e-02	yes	up	_	_	_	_	_
c90770_g1	0.00	40.00	0.000	1.397	3.90	1.64e-03	4.77e-02	yes	up	_	_	_	_	_
c124347_g4	0.00	40.00	0.000	0.857	3.26	1.64e-03	4.77e-02	yes	up	_	_	_	_	_
c104193_g1	0.00	40.00	0.000	1.384	3.89	1.64e-03	4.77e-02	yes	up	_	_	_	_	_
c110806_g1	0.00	40.00	0.000	1.168	3.66	1.64e-03	4.77e-02	yes	up	_	_	_	_	_
c123652_g2	47.00	3.00	4.973	0.236	-3.92	1.64e-03	4.77e-02	yes	down	PREDICTED: HRAS-like suppressor 3-like isoform X1 [Aplysia californica]	_	_	KLHL24_35	PF04970.10|LRAT|Lecithin retinol acyltransferase|m.14678:45-157
c111010_g1	1726.00	202.00	207.891	13.225	-3.96	1.64e-03	4.77e-02	yes	down	_	_	_	_	_
c98360_g1	516.00	59.00	45.747	3.166	-3.81	1.64e-03	4.78e-02	yes	down	Perlucin [Crassostrea gigas]	_	_	CLEC4E	PF00059.18|Lectin_C|Lectin C-type domain|m.53976:46-151
c103687_g1	23443.00	2784.00	2703.456	195.583	-3.79	1.65e-03	4.78e-02	yes	down	_	_	_	_	PF13833.3|EF-hand_8|EF-hand domain pair|m.59691:44-71;PF13499.3|EF-hand_7|EF-hand domain pair|m.59691:49-105;PF13202.3|EF-hand_5|EF hand|m.59691:48-65
c112531_g1	708.00	82.00	39.833	2.775	-3.80	1.66e-03	4.82e-02	yes	down	hypothetical protein LOTGIDRAFT_232838 [Lottia gigantea]	_	_	_	PF16977.2|ApeC|C-terminal domain of apextrin|m.38469:13-212;PF00431.17|CUB|CUB domain|m.38469:219-329;PF00051.15|Kringle|Kringle domain|m.38469:343-395
c115784_g1	8038.00	955.00	1351.288	99.108	-3.77	1.66e-03	4.82e-02	yes	down	_	_	_	_	_
c109991_g3	1184.00	138.00	99.595	14.993	-2.72	1.67e-03	4.83e-02	yes	down	_	_	_	_	_
c85192_g1	127.00	12.00	9.286	0.527	-3.90	1.68e-03	4.88e-02	yes	down	tubulin alpha-2 [Fasciola hepatica]	RecName: Full=Tubulin alpha-1 chain [Drosophila melanogaster]	Putative uncharacterized protein; Tubulin is the major constituent of microtubules. It binds [...]	TUBA	PF03953.14|Tubulin_C|Tubulin C-terminal domain|m.48473:160-288;PF00091.22|Tubulin|Tubulin/FtsZ family, GTPase domain|m.48473:1-110
c119530_g3	5.00	189.00	0.354	8.006	4.16	1.69e-03	4.90e-02	yes	up	_	_	_	_	_
c107944_g1	58.00	5.00	3.177	4.226	0.40	1.70e-03	4.90e-02	no	up	_	_	_	_	_
c109406_g1	1074.00	126.00	88.501	6.278	-3.80	1.71e-03	4.93e-02	yes	down	_	_	_	_	_
c71002_g1	194.00	21.00	114.563	8.020	-3.82	1.71e-03	4.94e-02	yes	down	uncharacterized protein LOC494720 [Xenopus laevis]	_	_	EEF1A	PF00009.24|GTP_EFTU|Elongation factor Tu GTP binding domain|m.54697:5-102
c118739_g1	891.00	105.00	23.741	1.667	-3.75	1.72e-03	4.95e-02	yes	down	hypothetical protein LOTGIDRAFT_155365 [Lottia gigantea]	RecName: Full=Cytochrome P450 2B11; AltName: Full=CYPIIB11; AltName: Full=Cytochrome P450 PBD-2	_	CYP2K	PF00067.19|p450|Cytochrome P450|m.28077:27-467
c112364_g3	1.00	84.00	0.134	6.710	4.86	1.72e-03	4.95e-02	yes	up	PREDICTED: uncharacterized protein LOC103309928 [Acyrthosiphon pisum]	_	_	_	_
c92109_g1	1.00	84.00	0.061	2.856	4.20	1.72e-03	4.95e-02	yes	up	_	_	_	_	_
c118583_g1	1.00	83.00	0.061	2.532	4.03	1.72e-03	4.95e-02	yes	up	_	_	_	_	_
c122455_g1	1.00	83.00	0.122	6.386	4.87	1.72e-03	4.95e-02	yes	up	_	_	_	_	_
c88981_g2	46.00	3.00	40.579	1.721	-4.48	1.72e-03	4.95e-02	yes	down	_	_	_	_	_
c110191_g10	46.00	3.00	2.102	0.236	-2.71	1.72e-03	4.95e-02	yes	down	_	_	_	_	_
c102778_g1	182.00	19.00	14.406	0.911	-3.84	1.73e-03	4.96e-02	yes	down	hypothetical protein T265_02136 [Opisthorchis viverrini]	RecName: Full=60S ribosomal protein L7a; AltName: Full=Surfeit locus protein 3 [Takifugu rubripes]	SJCHGC02816 protein	RP-L7Ae, RPL7A	PF01248.23|Ribosomal_L7Ae|Ribosomal protein L7Ae/L30e/S12e/Gadd45 family|m.15689:164-246
c88934_g1	103.00	10.00	6.378	0.371	-3.78	1.73e-03	4.97e-02	yes	down	SJCHGC02792 protein [Schistosoma ATP:ADP antiporter [Schistosoma japonicum]	RecName: Full=ADP,ATP carrier protein 3, mitochondrial; AltName: Full=ADP/ATP translocase 3; AltName: Full=Adenine nucleotide translocator 3; Short=ANT 3; Flags: Pr	SJCHGC02792 protein	SLC25A4S, ANT	PF00153.24|Mito_carr|Mitochondrial carrier protein|m.62420:25-120;PF00153.24|Mito_carr|Mitochondrial carrier protein|m.62420:129-222;PF00153.24|Mito_carr|Mitochondrial carrier protein|m.62420:228-316
c104564_g1	57.00	5.00	13.294	0.729	-4.01	1.77e-03	5.05e-02	no	down	_	_	_	_	_
c99414_g2	1586.00	190.00	355.640	26.618	-3.73	1.77e-03	5.05e-02	no	down	PREDICTED: putative tyrosinase-like protein tyr-3-like [Hydra vulgaris]	RecName: Full=Probable prolyl 4-hydroxylase 4; Flags: Precursor [Arabidopsis thaliana]	_	_	PF01549.21|ShK|ShK domain-like|m.29912:5-18;PF01549.21|ShK|ShK domain-like|m.29912:27-61;PF01549.21|ShK|ShK domain-like|m.29912:65-100;PF01549.21|ShK|ShK domain-like|m.29912:109-143;PF01549.21|ShK|ShK domain-like|m.29912:147-168
c121242_g2	214.00	23.00	55.388	3.740	-3.85	1.78e-03	5.05e-02	no	down	arylsulfatase [Haliotis discus discus]	_	_	ARSI_J	PF00884.20|Sulfatase|Sulfatase|m.50408:64-159
c113152_g1	68.00	6.00	9.909	0.540	-3.97	1.79e-03	5.05e-02	no	down	_	_	_	_	_
c92224_g1	195.00	5434.00	25.146	446.530	4.14	1.80e-03	5.05e-02	no	up	_	_	_	_	_
c130227_g1	1930.00	233.00	23.179	1.661	-3.72	1.81e-03	5.05e-02	no	down	_	_	_	_	_
c110570_g1	1.00	82.00	0.061	4.327	4.78	1.81e-03	5.05e-02	no	up	_	_	_	_	_
c112323_g4	22.00	0.00	2.212	0.000	-4.53	1.81e-03	5.05e-02	no	down	_	_	_	_	_
c17786_g1	22.00	0.00	59.738	0.000	-9.22	1.81e-03	5.05e-02	no	down	_	_	_	_	_
c103296_g1	22.00	0.00	1.515	0.000	-4.01	1.81e-03	5.05e-02	no	down	_	_	_	_	_
c92932_g1	22.00	0.00	2.871	0.000	-4.89	1.81e-03	5.05e-02	no	down	_	_	_	_	_
c54035_g1	22.00	0.00	2.334	0.000	-4.61	1.81e-03	5.05e-02	no	down	putative 60S ribosomal protein L10A [Latrodectus hesperus]	_	60S ribosomal protein L10A, putative	RP-L10Ae, RPL10A	PF00687.18|Ribosomal_L1|Ribosomal protein L1p/L10e family|m.67105:24-213
c49277_g1	22.00	0.00	1.674	0.000	-4.15	1.81e-03	5.05e-02	no	down	hypothetical protein T265_11082 [Opisthorchis viverrini]	_	_	_	_
c108979_g2	22.00	0.00	3.042	0.000	-4.97	1.81e-03	5.05e-02	no	down	_	_	_	_	_
c95295_g1	22.00	0.00	2.468	0.000	-4.68	1.81e-03	5.05e-02	no	down	_	_	_	_	_
c74764_g1	22.00	0.00	3.091	0.000	-5.00	1.81e-03	5.05e-02	no	down	_	_	_	_	_
c132452_g1	22.00	0.00	1.674	0.000	-4.15	1.81e-03	5.05e-02	no	down	_	_	_	_	_
c55677_g1	22.00	0.00	1.430	0.000	-3.94	1.81e-03	5.05e-02	no	down	_	_	_	_	_
c56676_g1	22.00	0.00	2.419	0.000	-4.65	1.81e-03	5.05e-02	no	down	cytochrome c oxidase subunit III [Unionicola foili]	RecName: Full=Cytochrome c oxidase subunit 3; AltName: Full=Cytochrome c oxidase polypeptide III	_	COX3	_
c2879_g1	22.00	0.00	1.674	0.000	-4.15	1.81e-03	5.05e-02	no	down	_	_	_	_	_
c89027_g1	22.00	0.00	0.904	0.000	-3.33	1.81e-03	5.05e-02	no	down	_	_	_	_	_
c167022_g1	22.00	0.00	2.590	0.000	-4.75	1.81e-03	5.05e-02	no	down	PREDICTED: tolloid-like protein 1-like [Echinops telfairi]	RecName: Full=Tolloid-like protein 2; AltName: Full=Metalloprotease xolloid; AltName: Full=Xenopus tolloid; Flags: Precursor [Xenopus laevis]	_	BMP1, TLD	PF00431.17|CUB|CUB domain|m.9509:1-86
c27104_g1	22.00	0.00	2.566	0.000	-4.74	1.81e-03	5.05e-02	no	down	hypothetical protein [Magnetospirillum gryphiswaldense]	_	_	_	_
c119647_g5	0.00	39.00	0.000	2.005	4.40	1.81e-03	5.05e-02	no	up	_	_	_	_	_
c74263_g1	0.00	39.00	0.000	1.026	3.49	1.81e-03	5.05e-02	no	up	_	_	_	_	_
c188154_g1	0.00	39.00	0.000	2.390	4.64	1.81e-03	5.05e-02	no	up	_	_	_	_	_
c129664_g4	0.00	39.00	0.000	1.499	4.00	1.81e-03	5.05e-02	no	up	_	_	_	_	_
c98088_g1	0.00	39.00	0.000	1.964	4.37	1.81e-03	5.05e-02	no	up	_	_	_	_	_
c80415_g1	0.00	39.00	0.000	1.701	4.17	1.81e-03	5.05e-02	no	up	_	_	_	_	_
c94814_g1	0.00	39.00	0.000	1.559	4.05	1.81e-03	5.05e-02	no	up	_	_	_	_	_
c45709_g1	0.00	39.00	0.000	0.959	3.40	1.81e-03	5.05e-02	no	up	_	_	_	_	_
c2383_g1	0.00	39.00	0.000	3.423	5.14	1.81e-03	5.05e-02	no	up	_	_	_	_	_
c117009_g1	0.00	39.00	0.000	2.174	4.51	1.81e-03	5.05e-02	no	up	_	_	_	_	_
c98191_g1	0.00	39.00	0.000	1.148	3.64	1.81e-03	5.05e-02	no	up	_	_	_	_	_
c97529_g2	0.00	39.00	0.000	2.167	4.50	1.81e-03	5.05e-02	no	up	_	_	_	_	_
c98554_g1	0.00	39.00	0.000	2.262	4.56	1.81e-03	5.05e-02	no	up	_	_	_	_	_
c100995_g1	0.00	39.00	0.000	1.701	4.17	1.81e-03	5.05e-02	no	up	_	_	_	_	_
c185432_g1	0.00	39.00	0.000	1.816	4.26	1.81e-03	5.05e-02	no	up	_	_	_	_	_
c86982_g1	0.00	39.00	0.000	1.775	4.23	1.81e-03	5.05e-02	no	up	_	_	_	_	_
c90851_g2	0.00	39.00	0.000	1.620	4.10	1.81e-03	5.05e-02	no	up	_	_	_	_	_
c109999_g2	0.00	39.00	0.000	4.131	5.40	1.81e-03	5.05e-02	no	up	_	_	_	_	_
c119352_g2	0.00	39.00	0.000	1.512	4.01	1.81e-03	5.05e-02	no	up	_	_	_	_	_
c170294_g1	0.00	39.00	0.000	1.310	3.82	1.81e-03	5.05e-02	no	up	_	_	_	_	_
c12190_g1	0.00	39.00	0.000	2.133	4.48	1.81e-03	5.05e-02	no	up	_	_	_	_	_
c100715_g1	0.00	39.00	0.000	2.316	4.59	1.81e-03	5.05e-02	no	up	_	_	_	_	_
c84163_g1	0.00	39.00	0.000	0.965	3.41	1.81e-03	5.05e-02	no	up	_	_	_	_	_
c115888_g2	11.00	348.00	0.110	3.024	3.89	1.82e-03	5.06e-02	no	up	Tenascin-X [Crassostrea gigas]	_	_	_	_
c119970_g1	411.00	48.00	19.819	1.391	-3.74	1.83e-03	5.07e-02	no	down	_	_	_	_	_
c113551_g1	20.00	590.00	1.161	20.502	4.03	1.83e-03	5.08e-02	no	up	_	_	_	_	_
c118530_g1	2086.00	253.00	39.516	2.876	-3.73	1.83e-03	5.09e-02	no	down	Collagen alpha-4(VI) chain [Crassostrea gigas]	_	_	COL6A	PF00092.25|VWA|von Willebrand factor type A domain|m.28356:190-355;PF13519.3|VWA_2|von Willebrand factor type A domain|m.28356:191-297;PF01607.21|CBM_14|Chitin binding Peritrophin-A domain|m.28356:529-574;PF01607.21|CBM_14|Chitin binding Peritrophin-A domain|m.28356:667-711
c118548_g1	16707.00	2052.00	742.353	51.974	-3.83	1.84e-03	5.09e-02	no	down	_	_	_	_	_
c104839_g2	2.00	102.00	0.061	2.734	4.14	1.84e-03	5.09e-02	no	up	Receptor-type tyrosine-protein phosphatase kappa [Crassostrea gigas]	RecName: Full=Receptor-type tyrosine-protein phosphatase T; Short=R-PTP-T; AltName: Full=RPTPmam4; AltName: Full=Receptor-type tyrosine-protein phosphatase rho; Sh	_	PTPRE	PF00102.24|Y_phosphatase|Protein-tyrosine phosphatase|m.5594:438-614
c122211_g1	2.00	102.00	0.086	2.889	4.01	1.84e-03	5.09e-02	no	up	_	_	_	_	_
c900_g1	90.00	9.00	33.382	2.133	-3.91	1.86e-03	5.13e-02	no	down	Ribosomal protein S25 [Schistosoma Ribosomal protein S25 [Schistosoma japonicum]	RecName: Full=40S ribosomal protein S25	SJCHGC01998 protein	RP-S25e, RPS25	PF03297.12|Ribosomal_S25|S25 ribosomal protein|m.24392:27-123
c101548_g1	34.00	1.00	2.419	0.041	-4.16	1.86e-03	5.13e-02	no	down	hypothetical protein T265_07075 [Opisthorchis viverrini]	_	_	_	PF00335.17|Tetraspannin|Tetraspanin family|m.77170:8-288
c47626_g1	34.00	1.00	1.723	0.034	-3.77	1.86e-03	5.13e-02	no	down	Heterogeneous nuclear ribonucleoprotein K [Schistosoma japonicum]	RecName: Full=Heterogeneous nuclear ribonucleoprotein K; Short=hnRNP K HNRPK_MACFA RecName: Full=Heterogeneous nuclear ribonucleoprotein K;	SJCHGC01201 protein	HNRNPK	PF00013.26|KH_1|KH domain|m.23761:31-84;PF00013.26|KH_1|KH domain|m.23761:105-168;PF00013.26|KH_1|KH domain|m.23761:319-382;PF07650.14|KH_2|KH domain|m.23761:102-135
c115070_g1	34.00	1.00	4.411	0.081	-4.64	1.86e-03	5.13e-02	no	down	_	_	_	_	_
c116612_g1	34.00	2.00	4.411	0.162	-4.11	1.86e-03	5.13e-02	no	down	hypothetical protein LOTGIDRAFT_234011 [Lottia gigantea]	_	_	_	_
c53242_g1	34.00	2.00	31.170	1.188	-4.60	1.86e-03	5.13e-02	no	down	small subunit ribosomal protein S27e [Schistosoma japonicum]	_	SJCHGC02603 protein	RP-S27e, RPS27	_
c66792_g1	45.00	3.00	5.352	0.216	-4.11	1.91e-03	5.25e-02	no	down	_	_	_	_	_
c119967_g2	45.00	3.00	4.313	0.176	-4.00	1.91e-03	5.25e-02	no	down	_	_	_	_	_
c128223_g1	45.00	3.00	6.696	0.277	-4.17	1.91e-03	5.25e-02	no	down	_	_	_	_	_
c90009_g1	78.00	7.00	8.407	0.459	-3.93	1.91e-03	5.26e-02	no	down	hypothetical protein T265_15193, partial [Opisthorchis viverrini]	_	_	_	_
c117707_g3	7.00	242.00	0.269	5.806	4.00	1.92e-03	5.27e-02	no	up	_	_	_	_	_
c46227_g1	2.00	101.00	0.061	1.985	3.69	1.92e-03	5.27e-02	no	up	_	_	_	_	_
c123455_g3	34.00	958.00	0.513	8.600	3.83	1.93e-03	5.30e-02	no	up	_	_	_	_	_
c122776_g1	21.00	620.00	0.257	4.604	3.72	1.93e-03	5.30e-02	no	up	PREDICTED: plancitoxin-1-like isoform X1 [Aplysia californica]	RecName: Full=Deoxyribonuclease-2-alpha; AltName: Full=Acid DNase; AltName: Full=Deoxyribonuclease II alpha; Short=DNase II alpha; AltName: Full=Lysosomal DNase II;	_	DNASE2	PF03265.12|DNase_II|Deoxyribonuclease II|m.29892:35-363
c124980_g1	4363.00	544.00	66.800	4.962	-3.72	1.95e-03	5.33e-02	no	down	Sodium- and chloride-dependent glycine transporter 2 [Crassostrea gigas]	RecName: Full=Sodium- and chloride-dependent glycine transporter 2; Short=GlyT-2; Short=GlyT2; Short=xGlyT2; AltName: Full=Solute carrier family 6 member 5	_	SLC6A5S	PF00209.15|SNF|Sodium:neurotransmitter symporter family|m.71931:103-648
c84943_g1	88.00	8.00	41.507	2.430	-4.04	1.96e-03	5.33e-02	no	down	hypothetical protein CAPTEDRAFT_223239 [Capitella teleta]	RecName: Full=Teneurin-1; Short=Ten-1; AltName: Full=Protein Odd Oz/ten-m homolog 1; AltName: Full=Tenascin-M1; Short=Ten-m1; AltName: Full=Teneurin transmembrane p	_	_	PF12661.4|hEGF|Human growth factor-like EGF|m.27449:26-37
c121586_g1	2192.00	273.00	73.838	5.522	-3.72	1.97e-03	5.33e-02	no	down	hypothetical protein LOTGIDRAFT_238278 [Lottia gigantea]	RecName: Full=Fibropellin-1; AltName: Full=Epidermal growth factor-related protein 1; AltName: Full=Fibropellin-I; AltName: Full=SpEGF I; AltName: Full=UEGF-1; Flags	_	NOTCH	PF00008.24|EGF|EGF-like domain|m.34152:89-114;PF00008.24|EGF|EGF-like domain|m.34152:123-153;PF00008.24|EGF|EGF-like domain|m.34152:167-198;PF00008.24|EGF|EGF-like domain|m.34152:244-274;PF07974.10|EGF_2|EGF-like domain|m.34152:244-277;PF01607.21|CBM_14|Chitin binding Peritrophin-A domain|m.34152:29-76;PF12661.4|hEGF|Human growth factor-like EGF|m.34152:105-116;PF12661.4|hEGF|Human growth factor-…
c115441_g1	112.00	3043.00	2.615	42.341	3.97	1.98e-03	5.33e-02	no	up	_	_	_	_	_
c129928_g3	44197.00	5563.00	1635.558	123.229	-3.73	1.98e-03	5.33e-02	no	down	Cathepsin L [Crassostrea gigas]	RecName: Full=Digestive cysteine proteinase 1; Flags: Precursor [Homarus americanus]	_	CTSL	PF00112.20|Peptidase_C1|Papain family cysteine protease|m.27065:149-356;PF08246.9|Inhibitor_I29|Cathepsin propeptide inhibitor domain (I29)|m.27065:57-117
c94637_g1	33.00	1.00	1.796	0.034	-3.82	1.99e-03	5.33e-02	no	down	egg antigen [Paragonimus westermani]	RecName: Full=Major egg antigen; AltName: Full=p40	_	_	PF00011.18|HSP20|Hsp20/alpha crystallin family|m.1909:133-216;PF00011.18|HSP20|Hsp20/alpha crystallin family|m.1909:283-351
c94367_g1	33.00	1.00	4.240	0.081	-4.58	1.99e-03	5.33e-02	no	down	_	_	_	_	_
c79226_g1	33.00	1.00	14.259	0.277	-5.25	1.99e-03	5.33e-02	no	down	_	_	_	_	_
c86061_g1	33.00	2.00	2.248	0.081	-3.70	1.99e-03	5.33e-02	no	down	translation initiation factor 1A [Clonorchis sinensis]	RecName: Full=Eukaryotic translation initiation factor 1A, X-chromosomal; Short=eIF-1A X isoform; AltName: Full=Eukaryotic translation initiation factor 4C; Short=e	SJCHGC02175 protein; Seems to be required for maximal rate of protein biosynthesis. Enhances [...]	EIF1A	PF01176.16|eIF-1a|Translation initiation factor 1A / IF-1|m.4574:32-93
c99092_g1	33.00	2.00	2.126	0.074	-3.68	1.99e-03	5.33e-02	no	down	cathepsin L [Fasciola gigantica]	RecName: Full=Cathepsin S; Flags: Precursor [Saimiri boliviensis boliviensis]	_	CTSS	PF00112.20|Peptidase_C1|Papain family cysteine protease|m.22967:112-324;PF08246.9|Inhibitor_I29|Cathepsin propeptide inhibitor domain (I29)|m.22967:25-85
c123424_g1	1.00	80.00	0.073	2.916	4.12	2.01e-03	5.33e-02	no	up	_	_	_	_	_
c113204_g5	21.00	0.00	7.331	0.000	-6.22	2.02e-03	5.33e-02	no	down	hypothetical protein LOTGIDRAFT_236237 [Lottia gigantea]	_	_	_	_
c100809_g1	21.00	0.00	2.248	0.000	-4.55	2.02e-03	5.33e-02	no	down	_	_	_	_	_
c75424_g1	21.00	0.00	5.327	0.000	-5.76	2.02e-03	5.33e-02	no	down	60S ribosomal protein L27 [Latrodectus hesperus]	_	60S ribosomal protein L27, putative	RP-L27e, RPL27	PF01777.15|Ribosomal_L27e|Ribosomal L27e protein family|m.36434:53-136
c176011_g1	21.00	0.00	2.933	0.000	-4.92	2.02e-03	5.33e-02	no	down	60s ribosomal protein L15 [Ornithodoros parkeri]	RecName: Full=60S ribosomal protein L15; AltName: Full=YL10	ribosomal protein L15, putative	RP-L15e, RPL15	PF00827.14|Ribosomal_L15e|Ribosomal L15|m.48569:2-193
c129351_g3	21.00	0.00	2.859	0.000	-4.89	2.02e-03	5.33e-02	no	down	_	_	_	_	_
c74315_g1	21.00	0.00	19.257	0.000	-7.60	2.02e-03	5.33e-02	no	down	_	_	_	_	_
c86382_g1	21.00	0.00	2.395	0.000	-4.64	2.02e-03	5.33e-02	no	down	chalcone isomerase [Gossypium hirsutum]	RecName: Full=Probable chalcone--flavonone isomerase 3; Short=Chalcone isomerase 3; AltName: Full=Chalcone isomerase-like 1 [Arabidopsis thaliana]	SubName: Full=Putative uncharacterized protein;	_	PF02431.12|Chalcone|Chalcone-flavanone isomerase|m.27508:28-225
c102228_g2	21.00	0.00	3.079	0.000	-4.99	2.02e-03	5.33e-02	no	down	_	_	_	_	_
c77739_g1	21.00	0.00	1.808	0.000	-4.25	2.02e-03	5.33e-02	no	down	SPARC protein [Clonorchis sinensis]	_	SJCHGC09385 protein	_	PF10591.6|SPARC_Ca_bdg|Secreted protein acidic and rich in cysteine Ca binding region|m.7597:140-258
c48840_g1	21.00	0.00	3.947	0.000	-5.34	2.02e-03	5.33e-02	no	down	putative 60S ribosomal protein L23 [Maconellicoccus hirsutus]	RecName: Full=60S ribosomal protein L23; AltName: Full=L17A [Drosophila melanogaster]	similar to ribosomal protein L23	RP-L23e, RPL23	PF00238.16|Ribosomal_L14|Ribosomal protein L14p/L23e|m.45148:35-152
c107379_g1	21.00	0.00	1.026	0.000	-3.49	2.02e-03	5.33e-02	no	down	flavonoid 3',5'-hydroxylase [Gossypium hirsutum]	RecName: Full=Flavonoid 3',5'-hydroxylase 2; Short=F3'5'H; AltName: Full=CYPLXXVA3; AltName: Full=Cytochrome P450 75A3	flavonoid 3',5'-hydroxylase (EC:1.14.13.88)	CYP75A	PF00067.19|p450|Cytochrome P450|m.74276:47-499
c21272_g1	21.00	0.00	1.051	0.000	-3.52	2.02e-03	5.33e-02	no	down	_	_	_	_	PF00791.17|ZU5|ZU5 domain|m.35532:350-434
c55337_g2	21.00	0.00	1.760	0.000	-4.22	2.02e-03	5.33e-02	no	down	collagen type I/II/III/V/XI alpha [Clonorchis sinensis]	RecName: Full=Collagen alpha-1(I) chain; AltName: Full=Alpha-1 type I collagen; Flags: Precursor [Cynops pyrrhogaster]	_	COL2A	PF01391.15|Collagen|Collagen triple helix repeat (20 copies)|m.60453:2-59;PF01391.15|Collagen|Collagen triple helix repeat (20 copies)|m.60453:56-114;PF01391.15|Collagen|Collagen triple helix repeat (20 copies)|m.60453:239-297
c152234_g1	21.00	0.00	2.725	0.000	-4.82	2.02e-03	5.33e-02	no	down	_	_	_	_	_
c102079_g1	0.00	38.00	0.000	1.809	4.25	2.02e-03	5.33e-02	no	up	wsc domain-containing protein [Ophiostoma piceae UAMH 11346]	_	_	_	_
c96323_g1	0.00	38.00	0.000	1.553	4.05	2.02e-03	5.33e-02	no	up	_	_	_	_	_
c84067_g1	0.00	38.00	0.000	10.362	6.71	2.02e-03	5.33e-02	no	up	PREDICTED: phosphoenolpyruvate carboxykinase [GTP]	RecName: Full=Phosphoenolpyruvate carboxykinase, cytosolic [GTP]	_	E4.1.1.32, pckA, PEPCK	PF00821.15|PEPCK|Phosphoenolpyruvate carboxykinase|m.61357:1-132
c103123_g1	0.00	38.00	0.000	1.640	4.12	2.02e-03	5.33e-02	no	up	_	_	_	_	_
c101036_g1	0.00	38.00	0.000	2.099	4.46	2.02e-03	5.33e-02	no	up	_	_	_	_	_
c79596_g2	0.00	38.00	0.000	1.168	3.66	2.02e-03	5.33e-02	no	up	_	_	_	_	_
c122626_g3	0.00	38.00	0.000	2.079	4.45	2.02e-03	5.33e-02	no	up	_	_	_	_	_
c101143_g1	0.00	38.00	0.000	1.573	4.06	2.02e-03	5.33e-02	no	up	_	_	_	_	_
c62965_g1	0.00	38.00	0.000	0.972	3.42	2.02e-03	5.33e-02	no	up	_	_	_	_	_
c97964_g1	0.00	38.00	0.000	0.851	3.25	2.02e-03	5.33e-02	no	up	_	_	_	_	_
c111621_g1	0.00	38.00	0.000	4.881	5.64	2.02e-03	5.33e-02	no	up	_	_	_	_	_
c109867_g3	0.00	38.00	0.000	1.721	4.19	2.02e-03	5.33e-02	no	up	_	_	_	_	_
c122623_g2	0.00	38.00	0.000	2.052	4.43	2.02e-03	5.33e-02	no	up	_	_	_	_	_
c167649_g1	0.00	38.00	0.000	1.553	4.05	2.02e-03	5.33e-02	no	up	hypothetical protein EMH_0063220 [Eimeria mitis]	RecName: Full=Uncharacterized histidine-rich protein DDB_G0274557; Flags: Precursor [Dictyostelium discoideum]	_	MEPCE, BCDIN3	_
c127979_g2	0.00	38.00	0.000	1.033	3.50	2.02e-03	5.33e-02	no	up	_	_	_	_	_
c114704_g1	0.00	38.00	0.000	1.465	3.97	2.02e-03	5.33e-02	no	up	_	_	_	_	_
c118948_g3	0.00	38.00	0.000	1.877	4.31	2.02e-03	5.33e-02	no	up	_	_	_	_	_
c121193_g1	0.00	38.00	0.000	1.235	3.74	2.02e-03	5.33e-02	no	up	_	_	_	_	_
c96210_g1	0.00	38.00	0.000	1.310	3.82	2.02e-03	5.33e-02	no	up	_	_	_	_	_
c119996_g2	0.00	38.00	0.000	1.681	4.15	2.02e-03	5.33e-02	no	up	_	_	_	_	_
c104711_g1	0.00	38.00	0.000	3.180	5.04	2.02e-03	5.33e-02	no	up	_	_	_	_	_
c74842_g1	0.00	37.00	0.000	1.532	4.03	2.02e-03	5.33e-02	no	up	_	_	_	_	_
c102737_g2	0.00	37.00	0.000	2.072	4.44	2.02e-03	5.33e-02	no	up	_	_	_	_	_
c49523_g1	0.00	37.00	0.000	2.309	4.59	2.02e-03	5.33e-02	no	up	_	_	_	_	_
c26072_g1	0.00	37.00	0.000	2.950	4.93	2.02e-03	5.33e-02	no	up	_	_	_	_	_
c81218_g1	0.00	37.00	0.000	1.755	4.21	2.02e-03	5.33e-02	no	up	_	_	_	_	_
c128103_g5	0.00	37.00	0.000	1.964	4.37	2.02e-03	5.33e-02	no	up	_	_	_	_	_
c86378_g2	0.00	37.00	0.000	0.898	3.32	2.02e-03	5.33e-02	no	up	_	_	_	_	_
c48179_g1	0.00	37.00	0.000	0.864	3.27	2.02e-03	5.33e-02	no	up	_	_	_	_	_
c105951_g2	0.00	37.00	0.000	2.160	4.50	2.02e-03	5.33e-02	no	up	SNAP-25 [Aplysia californica]	RecName: Full=Synaptosomal-associated protein 25; Short=SNAP-25; AltName: Full=Synaptosomal-associated 25 kDa protein [Drosophila melanogaster]	_	SNAP25	_
c118854_g3	0.00	37.00	0.000	1.762	4.22	2.02e-03	5.33e-02	no	up	_	_	_	_	_
c114079_g1	0.00	37.00	0.000	0.932	3.37	2.02e-03	5.33e-02	no	up	_	_	_	_	_
c109968_g1	0.00	37.00	0.000	1.458	3.96	2.02e-03	5.33e-02	no	up	_	_	_	_	_
c104819_g1	2270.00	286.00	207.316	15.837	-3.70	2.05e-03	5.42e-02	no	down	PREDICTED: kinesin-related protein 1-like [Poecilia formosa]	_	_	_	PF00386.18|C1q|C1q domain|m.10497:79-171
c111812_g1	3.00	119.00	0.073	1.715	3.39	2.06e-03	5.43e-02	no	up	_	_	_	_	_
c92806_g1	87.00	8.00	6.733	0.236	-4.35	2.06e-03	5.44e-02	no	down	_	_	_	_	_
c110647_g1	161.00	18.00	9.958	0.668	-3.71	2.07e-03	5.45e-02	no	down	hypothetical protein CAPTEDRAFT_152708 [Capitella teleta]	RecName: Full=Cell number regulator 9; AltName: Full=ZmCNR09 [Zea mays]	_	_	PF04749.14|PLAC8|PLAC8 family|m.22484:62-152
c73145_g1	54.00	4.00	11.461	0.527	-4.20	2.09e-03	5.48e-02	no	down	unknown [Schistosoma japonicum]	RecName: Full=40S ribosomal protein S15; AltName: Full=RIG protein [Sus scrofa]	Ribosomal protein S15 Putative uncharacterized protein	RP-S15e, RPS15	PF00203.18|Ribosomal_S19|Ribosomal protein S19|m.20320:68-149
c110974_g1	54.00	4.00	7.954	0.932	-2.96	2.09e-03	5.48e-02	no	down	hypothetical protein EhV18_00156 [Emiliania huxleyi virus 18]	RecName: Full=Sulfated surface glycoprotein 185; Short=SSG 185; Flags: Precursor	_	_	_
c71228_g1	54.00	5.00	3.666	0.203	-3.64	2.09e-03	5.48e-02	no	down	cathepsin B1 [Trichobilharzia szidati]	RecName: Full=Cathepsin B-like cysteine proteinase; AltName: Full=Antigen Sm31; Flags: Precursor [Schistosoma mansoni]	_	CTSB	PF00112.20|Peptidase_C1|Papain family cysteine protease|m.7519:91-338;PF08127.10|Propeptide_C1|Peptidase family C1 propeptide|m.7519:31-71
c106922_g1	54.00	5.00	22.922	1.438	-3.90	2.09e-03	5.48e-02	no	down	_	_	_	_	_
c32111_g1	97.00	10.00	15.176	0.965	-3.84	2.09e-03	5.48e-02	no	down	hypothetical protein T265_09909 [Opisthorchis viverrini]	_	Clone ZZZ427 mRNA sequence	EIF5A	PF01287.17|eIF-5a|Eukaryotic elongation factor 5A hypusine, DNA-binding OB fold|m.51847:86-155
c108258_g1	97.00	10.00	2.774	0.169	-3.42	2.09e-03	5.48e-02	no	down	PREDICTED: neuroligin-2-like [Aplysia californica]	RecName: Full=Neuroligin-4, X-linked; Short=Neuroligin X; AltName: Full=HNLX; Flags: Precursor [Homo sapiens]	_	NLGN	PF00135.25|COesterase|Carboxylesterase family|m.72140:24-536
c106177_g4	4.00	157.00	0.403	6.980	3.82	2.12e-03	5.56e-02	no	up	_	_	_	_	_
c128457_g3	1.00	78.00	0.257	12.759	5.17	2.12e-03	5.56e-02	no	up	PREDICTED: uncharacterized protein LOC103314998 isoform X28 [Tribolium castaneum]	RecName: Full=Ankyrin-2; Short=ANK-2; AltName: Full=Brain ankyrin [Mus musculus]	_	ANK	PF13637.3|Ank_4|Ankyrin repeats (many copies)|m.13558:93-145;PF12796.4|Ank_2|Ankyrin repeats (3 copies)|m.13558:2-54;PF12796.4|Ank_2|Ankyrin repeats (3 copies)|m.13558:67-154;PF00023.27|Ank|Ankyrin repeat|m.13558:25-55;PF00023.27|Ank|Ankyrin repeat|m.13558:91-123;PF00023.27|Ank|Ankyrin repeat|m.13558:125-154;PF13606.3|Ank_3|Ankyrin repeat|m.13558:92-120;PF13606.3|Ank_3|Ankyrin repeat|m.13558:125-…
c119488_g1	2877.00	368.00	220.855	17.268	-3.67	2.13e-03	5.57e-02	no	down	_	_	_	_	_
c116805_g3	2991.00	382.00	246.526	19.051	-3.69	2.13e-03	5.57e-02	no	down	_	_	_	_	_
c119019_g1	65.00	6.00	5.743	0.324	-3.78	2.13e-03	5.58e-02	no	down	_	_	_	_	_
c128247_g1	170.00	20.00	5.975	0.405	-3.59	2.14e-03	5.58e-02	no	down	_	_	_	_	PF13499.3|EF-hand_7|EF-hand domain pair|m.67562:1-53;PF13833.3|EF-hand_8|EF-hand domain pair|m.67562:6-54;PF13405.3|EF-hand_6|EF-hand domain|m.67562:30-55;PF00036.29|EF-hand_1|EF hand|m.67562:30-55;PF13202.3|EF-hand_5|EF hand|m.67562:31-53
c85656_g1	32.00	1.00	2.187	0.041	-4.02	2.14e-03	5.58e-02	no	down	_	_	_	_	_
c113712_g1	32.00	2.00	1.637	0.061	-3.43	2.14e-03	5.58e-02	no	down	PREDICTED: LOW QUALITY PROTEIN: receptor-type tyrosine-protein phosphatase U [Corvus brachyrhynchos]	_	_	PTPRU	PF00102.24|Y_phosphatase|Protein-tyrosine phosphatase|m.55049:2-170;PF00102.24|Y_phosphatase|Protein-tyrosine phosphatase|m.55049:228-428
c81764_g1	32.00	2.00	1.259	0.041	-3.27	2.14e-03	5.58e-02	no	down	unnamed protein product [Oikopleura dioica]	RecName: Full=Fibrillin-3; Flags: Precursor [Homo sapiens]	_	EFEMP1, FBLN3	PF00431.17|CUB|CUB domain|m.76401:162-269;PF00431.17|CUB|CUB domain|m.76401:295-384;PF07645.12|EGF_CA|Calcium-binding EGF domain|m.76401:391-428
c72903_g1	32.00	2.00	4.142	0.155	-4.06	2.14e-03	5.58e-02	no	down	hypothetical protein CLF_106007 [Clonorchis sinensis]	_	_	_	_
c126821_g2	6.00	194.00	0.208	3.996	3.73	2.16e-03	5.62e-02	no	up	_	_	_	_	_
c109514_g1	75.00	7.00	2.859	0.162	-3.50	2.16e-03	5.63e-02	no	down	leucyl aminopeptidase [Fasciola gigantica]	RecName: Full=Putative aminopeptidase W07G4.4 [Caenorhabditis elegans]	Cytosol aminopeptidase-like protein	CARP, pepA	PF00883.18|Peptidase_M17|Cytosol aminopeptidase family, catalytic domain|m.28395:182-495
c103760_g1	505.00	63.00	29.814	2.235	-3.68	2.17e-03	5.64e-02	no	down	hypothetical protein CGI_10010463 [Crassostrea gigas]	_	_	EIF3A	PF03067.12|LPMO_10|Lytic polysaccharide mono-oxygenase, cellulose-degrading|m.63630:24-216
c120318_g1	588.00	74.00	29.631	2.174	-3.71	2.17e-03	5.65e-02	no	down	_	_	_	_	_
c94921_g1	1056.00	135.00	87.315	6.751	-3.67	2.19e-03	5.68e-02	no	down	_	_	_	_	_
c115933_g1	96.00	10.00	9.946	0.479	-4.12	2.19e-03	5.68e-02	no	down	_	_	_	_	_
c123310_g1	3550.00	460.00	80.473	6.548	-3.60	2.21e-03	5.68e-02	no	down	PREDICTED: uncharacterized protein LOC101845147 [Aplysia californica]	_	_	_	PF01823.16|MACPF|MAC/Perforin domain|m.16456:135-331
c126511_g1	116.00	12.00	3.898	0.257	-3.49	2.21e-03	5.68e-02	no	down	_	_	_	_	_
c112201_g1	64.00	6.00	2.651	0.142	-3.51	2.21e-03	5.68e-02	no	down	scavenger receptor cysteine-rich protein type 12 precursor [Strongylocentrotus purpuratus]	_	_	DMBT1	PF00530.15|SRCR|Scavenger receptor cysteine-rich domain|m.64816:89-185;PF00530.15|SRCR|Scavenger receptor cysteine-rich domain|m.64816:198-293;PF00530.15|SRCR|Scavenger receptor cysteine-rich domain|m.64816:306-405;PF15494.3|SRCR_2|Scavenger receptor cysteine-rich domain|m.64816:315-356
c118254_g1	137.00	15.00	3.983	0.263	-3.49	2.22e-03	5.68e-02	no	down	Poly [ADP-ribose]	_	_	PARP10_14_15	PF00644.17|PARP|Poly(ADP-ribose) polymerase catalytic domain|m.54870:405-590;PF01661.18|Macro|Macro domain|m.54870:29-141
c112116_g1	158.00	18.00	17.876	1.242	-3.74	2.23e-03	5.68e-02	no	down	PREDICTED: collagen alpha-1(XII) chain-like [Aplysia californica]	_	_	_	PF00092.25|VWA|von Willebrand factor type A domain|m.44111:138-244;PF13519.3|VWA_2|von Willebrand factor type A domain|m.44111:141-242
c121531_g1	1122.00	144.00	30.498	2.336	-3.65	2.24e-03	5.68e-02	no	down	hypothetical protein LOTGIDRAFT_113430 [Lottia gigantea]	RecName: Full=Endoglucanase E-4; AltName: Full=Cellulase E-4; AltName: Full=Cellulase E4; AltName: Full=Endo-1,4-beta-glucanase E-4; Flags: Precursor [Thermobifida f	_	_	PF00759.16|Glyco_hydro_9|Glycosyl hydrolase family 9|m.61044:147-564
c92139_g1	3649.00	474.00	647.156	52.001	-3.63	2.24e-03	5.68e-02	no	down	_	_	_	_	_
c128788_g3	4.00	154.00	0.147	3.375	3.81	2.24e-03	5.68e-02	no	up	_	_	_	_	_
c105094_g1	1.00	77.00	0.049	2.592	4.18	2.24e-03	5.68e-02	no	up	_	_	_	_	_
c89738_g1	437.00	54.00	141.762	16.661	-3.08	2.25e-03	5.68e-02	no	down	_	_	_	_	_
c125964_g2	6.00	192.00	0.220	4.125	3.72	2.25e-03	5.68e-02	no	up	_	_	_	_	_
c123188_g2	6.00	192.00	0.330	6.312	3.90	2.25e-03	5.68e-02	no	up	_	_	_	_	_
c186086_g1	20.00	0.00	2.774	0.000	-4.84	2.26e-03	5.68e-02	no	down	_	_	_	_	_
c720_g1	20.00	0.00	2.542	0.000	-4.72	2.26e-03	5.68e-02	no	down	40S ribosomal protein S3 [Ornithodoros parkeri]	RecName: Full=40S ribosomal protein S3 [Homo sapiens]	hypothetical protein	RP-S3e, RPS3	PF00189.17|Ribosomal_S3_C|Ribosomal protein S3, C-terminal domain|m.15371:104-186;PF07650.14|KH_2|KH domain|m.15371:18-90
c39335_g1	20.00	0.00	3.067	0.000	-4.99	2.26e-03	5.68e-02	no	down	_	_	_	_	_
c64240_g1	20.00	0.00	3.433	0.000	-5.14	2.26e-03	5.68e-02	no	down	hypothetical protein BRAFLDRAFT_69722 [Branchiostoma floridae]	RecName: Full=40S ribosomal protein S3a [Salmo salar]	hypothetical protein	RP-S3Ae, RPS3A	PF01015.15|Ribosomal_S3Ae|Ribosomal S3Ae family|m.27965:1-149
c68606_g1	20.00	0.00	4.448	0.000	-5.51	2.26e-03	5.68e-02	no	down	_	_	_	_	_
c71109_g1	20.00	0.00	1.857	0.000	-4.29	2.26e-03	5.68e-02	no	down	_	_	_	_	_
c101963_g1	20.00	0.00	0.831	0.000	-3.22	2.26e-03	5.68e-02	no	down	sucrose synthase [Gossypium sucrose synthase [Gossypium raimondii]	RecName: Full=Sucrose synthase; AltName: Full=Nodulin-100; Short=N-100; AltName: Full=Sucrose-UDP glucosyltransferase [Glycine max]	sucrose synthase (EC:2.4.1.13)	E2.4.1.13	PF00862.16|Sucrose_synth|Sucrose synthase|m.20996:2-199;PF00534.17|Glycos_transf_1|Glycosyl transferases group 1|m.20996:213-385;PF13692.3|Glyco_trans_1_4|Glycosyl transferases group 1|m.20996:217-369
c128000_g1	20.00	0.00	1.100	0.000	-3.58	2.26e-03	5.68e-02	no	down	GTPase IMAP family member 7 [Salmo salar]	_	_	_	PF04548.13|AIG1|AIG1 family|m.11017:2-145
c105365_g1	20.00	0.00	1.026	0.000	-3.49	2.26e-03	5.68e-02	no	down	_	_	_	_	_
c119655_g2	20.00	0.00	1.381	0.000	-3.89	2.26e-03	5.68e-02	no	down	_	RecName: Full=Cubilin; Flags: Precursor [Canis lupus familiaris]	_	_	PF00431.17|CUB|CUB domain|m.18253:2-74
c100000_g1	20.00	0.00	1.393	0.000	-3.90	2.26e-03	5.68e-02	no	down	_	_	_	_	_
c60586_g1	20.00	0.00	2.945	0.000	-4.93	2.26e-03	5.68e-02	no	down	14-3-3 protein [Penaeus monodon]	RecName: Full=14-3-3 protein homolog	_	YWHAE	_
c92346_g2	20.00	0.00	1.918	0.000	-4.33	2.26e-03	5.68e-02	no	down	_	_	_	_	_
c83521_g1	20.00	0.00	4.936	0.000	-5.65	2.26e-03	5.68e-02	no	down	PREDICTED: LOW QUALITY PROTEIN: cubilin [Oryctolagus cuniculus]	RecName: Full=Cubilin; AltName: Full=460 kDa receptor; AltName: Full=Glycoprotein 280; Short=gp280; AltName: Full=Intrinsic factor-cobalamin receptor; AltName: Full=I	_	BMP1, TLD	PF00431.17|CUB|CUB domain|m.72789:42-162
c74633_g2	20.00	0.00	2.774	0.000	-4.84	2.26e-03	5.68e-02	no	down	tubulin alpha chain [Dugesia japonica]	RecName: Full=Tubulin alpha chain	_	TUBA	PF00091.22|Tubulin|Tubulin/FtsZ family, GTPase domain|m.8125:16-216
c74633_g1	20.00	0.00	2.749	0.000	-4.83	2.26e-03	5.68e-02	no	down	neural alfa2 tubulin [Paracentrotus neural alfa2 tubulin [Paracentrotus lividus]	_	hypothetical protein; Tubulin is the major constituent of microtubules. It binds two moles o [...]	TUBA	PF03953.14|Tubulin_C|Tubulin C-terminal domain|m.54446:61-189
c109631_g1	20.00	0.00	1.320	0.000	-3.83	2.26e-03	5.68e-02	no	down	_	_	_	_	_
c90656_g1	20.00	0.00	2.309	0.000	-4.59	2.26e-03	5.68e-02	no	down	_	_	_	_	_
c32763_g1	20.00	0.00	2.187	0.000	-4.52	2.26e-03	5.68e-02	no	down	_	_	_	_	_
c95301_g1	20.00	0.00	1.259	0.000	-3.76	2.26e-03	5.68e-02	no	down	cathepsin B2 [Clonorchis sinensis]	_	cathepsin B	CTSB	PF00112.20|Peptidase_C1|Papain family cysteine protease|m.50489:83-331
c100269_g2	0.00	36.00	0.000	1.985	4.38	2.26e-03	5.68e-02	no	up	_	_	_	_	_
c109743_g3	0.00	36.00	0.000	4.807	5.62	2.26e-03	5.68e-02	no	up	hypothetical protein CGI_10005452 [Crassostrea gigas]	RecName: Full=E3 ubiquitin-protein ligase RNF213; AltName: Full=ALK lymphoma oligomerization partner on chromosome 17; AltName: Full=Mysterin; AltName: Full=RING	_	_	_
c103389_g1	0.00	36.00	0.000	2.167	4.50	2.26e-03	5.68e-02	no	up	_	_	_	_	_
c96151_g1	0.00	36.00	0.000	1.411	3.92	2.26e-03	5.68e-02	no	up	_	_	_	_	_
c118309_g1	0.00	36.00	0.000	1.391	3.90	2.26e-03	5.68e-02	no	up	_	_	_	_	_
c84600_g1	0.00	36.00	0.000	1.397	3.90	2.26e-03	5.68e-02	no	up	_	_	_	_	_
c102301_g1	0.00	36.00	0.000	4.766	5.60	2.26e-03	5.68e-02	no	up	_	_	_	_	_
c65602_g1	0.00	36.00	0.000	3.774	5.28	2.26e-03	5.68e-02	no	up	_	_	_	_	PF04548.13|AIG1|AIG1 family|m.19679:1-81
c124524_g3	0.00	36.00	0.000	1.566	4.06	2.26e-03	5.68e-02	no	up	_	_	_	_	_
c111415_g1	0.00	36.00	0.000	37.372	8.55	2.26e-03	5.68e-02	no	up	_	_	_	_	_
c122131_g1	0.00	36.00	0.000	2.856	4.89	2.26e-03	5.68e-02	no	up	_	_	_	_	_
c106034_g2	0.00	36.00	0.000	1.816	4.26	2.26e-03	5.68e-02	no	up	_	_	_	_	_
c64547_g1	0.00	36.00	0.000	1.384	3.89	2.26e-03	5.68e-02	no	up	_	_	_	_	_
c128404_g5	0.00	36.00	0.000	2.099	4.46	2.26e-03	5.68e-02	no	up	_	_	_	_	_
c100963_g1	0.00	36.00	0.000	1.931	4.34	2.26e-03	5.68e-02	no	up	_	_	_	_	_
c112851_g7	0.00	36.00	0.000	2.937	4.92	2.26e-03	5.68e-02	no	up	_	_	_	_	_
c130202_g3	0.00	36.00	0.000	1.526	4.02	2.26e-03	5.68e-02	no	up	_	_	_	_	_
c115849_g2	136.00	15.00	7.429	0.493	-3.67	2.26e-03	5.69e-02	no	down	_	_	_	_	_
c109928_g1	157.00	18.00	35.202	2.525	-3.75	2.26e-03	5.69e-02	no	down	hypothetical protein T265_15909, partial [Opisthorchis viverrini]	_	_	_	_
c102984_g1	2.00	95.00	0.073	2.099	3.67	2.28e-03	5.73e-02	no	up	_	_	_	_	_
c79081_g1	208.00	25.00	7.405	0.533	-3.57	2.29e-03	5.75e-02	no	down	_	_	_	_	_
c95925_g1	3.00	115.00	0.147	3.416	3.83	2.30e-03	5.76e-02	no	up	_	_	_	_	_
c94925_g1	3.00	114.00	0.305	7.169	4.17	2.30e-03	5.76e-02	no	up	_	_	_	_	_
c123918_g2	7.00	228.00	0.269	5.488	3.92	2.30e-03	5.77e-02	no	up	PREDICTED: uncharacterized protein LOC101860018 isoform X1 [Aplysia californica]	_	_	_	PF05050.9|Methyltransf_21|Methyltransferase FkbM domain|m.10385:179-321;PF03848.11|TehB|Tellurite resistance protein TehB|m.10385:171-227;PF04488.12|Gly_transf_sug|Glycosyltransferase sugar-binding region containing DXD motif|m.10386:69-108
c102702_g1	5.00	171.00	0.367	7.466	4.02	2.31e-03	5.78e-02	no	up	_	_	_	_	PF00386.18|C1q|C1q domain|m.24766:87-202
c103560_g4	114.00	13.00	4.888	0.331	-3.53	2.35e-03	5.89e-02	no	down	tubulin beta-4 [Fasciola hepatica]	RecName: Full=Tubulin beta-4B chain; AltName: Full=Tubulin beta-2 chain; AltName: Full=Tubulin beta-2C chain [Homo sapiens]	Tubulin beta-3 chain (Beta-tubulin class-IV); Tubulin is the major constituent of microtubul [...]	TUBB	PF00091.22|Tubulin|Tubulin/FtsZ family, GTPase domain|m.922:3-211;PF03953.14|Tubulin_C|Tubulin C-terminal domain|m.922:261-381
c123721_g1	165.00	19.00	17.033	1.195	-3.73	2.36e-03	5.90e-02	no	down	hypothetical protein LOTGIDRAFT_234011 [Lottia gigantea]	_	_	_	_
c102141_g1	5095.00	675.00	177.344	14.055	-3.65	2.36e-03	5.90e-02	no	down	_	_	_	_	_
c123213_g1	1.00	75.00	0.037	1.593	3.63	2.37e-03	5.90e-02	no	up	_	_	_	_	_
c19112_g1	1.00	75.00	0.843	40.856	5.44	2.37e-03	5.90e-02	no	up	_	_	_	_	PF01607.21|CBM_14|Chitin binding Peritrophin-A domain|m.51063:25-71
c109789_g1	1.00	75.00	0.049	2.815	4.29	2.37e-03	5.90e-02	no	up	_	_	_	_	_
c117376_g4	1.00	75.00	0.061	2.741	4.14	2.37e-03	5.90e-02	no	up	_	_	_	_	_
c106650_g1	42.00	3.00	2.248	0.095	-3.59	2.37e-03	5.90e-02	no	down	_	_	_	_	_
c125097_g2	42.00	3.00	3.042	0.128	-3.78	2.37e-03	5.90e-02	no	down	_	_	_	_	_
c50677_g1	42.00	3.00	2.151	0.095	-3.53	2.37e-03	5.90e-02	no	down	plastin-2 [Clonorchis sinensis]	RecName: Full=Plastin-2; AltName: Full=L-plastin; AltName: Full=LC64P; AltName: Full=Lymphocyte cytosolic protein 1; Short=LCP-1 [Homo sapiens]	Lymphocyte cytosolic protein 1	PLS3	PF00307.28|CH|Calponin homology (CH) domain|m.14220:95-200;PF00307.28|CH|Calponin homology (CH) domain|m.14220:218-317
c132417_g1	42.00	3.00	30.254	1.404	-4.34	2.37e-03	5.90e-02	no	down	hypothetical protein T265_14302, partial [Opisthorchis viverrini]	_	Ribosomal protein smL37a	RP-L37Ae, RPL37A	PF01780.16|Ribosomal_L37ae|Ribosomal L37ae protein family|m.41758:13-96
c112530_g2	4.00	151.00	0.721	16.931	4.37	2.37e-03	5.90e-02	no	up	_	_	_	_	_
c125563_g1	185.00	22.00	4.888	0.419	-3.26	2.38e-03	5.92e-02	no	down	_	_	_	_	_
c113611_g1	1516.00	199.00	88.281	6.974	-3.64	2.38e-03	5.92e-02	no	down	PREDICTED: uncharacterized protein LOC101849999 [Aplysia californica]	_	_	_	PF01607.21|CBM_14|Chitin binding Peritrophin-A domain|m.38148:34-80;PF01607.21|CBM_14|Chitin binding Peritrophin-A domain|m.38148:91-143
c81588_g1	52.00	5.00	20.992	1.289	-3.92	2.38e-03	5.92e-02	no	down	hypothetical protein T265_07192 [Opisthorchis viverrini]	RecName: Full=60S ribosomal protein L31 [Paralichthys olivaceus]	SJCHGC06383 protein	RP-L31e, RPL31	PF01198.16|Ribosomal_L31e|Ribosomal protein L31e|m.75667:26-105
c124922_g2	1553.00	39222.00	64.711	979.382	3.92	2.39e-03	5.92e-02	no	up	hypothetical protein LOTGIDRAFT_207716 [Lottia gigantea]	RecName: Full=11-beta-hydroxysteroid dehydrogenase-like 2; AltName: Full=17-beta-hydroxysteroid dehydrogenase-like 2; AltName: Full=Hydroxysteroid dehydrogenase 2;	_	_	PF13561.3|adh_short_C2|Enoyl-(Acyl carrier protein) reductase|m.4160:40-275;PF00106.22|adh_short|short chain dehydrogenase|m.4160:34-222;PF08659.7|KR|KR domain|m.4160:36-196
c111222_g1	19328.00	2581.00	3501.062	290.493	-3.59	2.40e-03	5.96e-02	no	down	_	_	_	_	_
c101250_g1	103.00	11.00	3.629	0.230	-3.50	2.41e-03	5.98e-02	no	down	hypothetical protein T265_05624 [Opisthorchis viverrini]	RecName: Full=ATP synthase subunit alpha, mitochondrial; Flags: Precursor [Mus musculus]	ATP synthase subunit alpha, mitochondrial Precursor [Taeniopygia guttata]	ATPeF1A, ATP5A1, ATP1	PF00006.22|ATP-synt_ab|ATP synthase alpha/beta family, nucleotide-binding domain|m.44613:195-418;PF00306.24|ATP-synt_ab_C|ATP synthase alpha/beta chain, C terminal domain|m.44613:425-550;PF02874.20|ATP-synt_ab_N|ATP synthase alpha/beta family, beta-barrel domain|m.44613:72-138
c124195_g2	49.00	1282.00	1.222	17.187	3.71	2.42e-03	6.01e-02	no	up	hypothetical protein LOTGIDRAFT_231745 [Lottia gigantea]	_	_	_	PF00059.18|Lectin_C|Lectin C-type domain|m.1643:38-149;PF00059.18|Lectin_C|Lectin C-type domain|m.1643:177-290;PF00059.18|Lectin_C|Lectin C-type domain|m.1644:65-182
c147803_g1	82.00	8.00	18.548	1.134	-3.92	2.44e-03	6.04e-02	no	down	hypothetical protein T265_11418 [Opisthorchis viverrini]	RecName: Full=40S ribosomal protein S14 [Homo sapiens]	ribosomal protein S14	RP-S14e, RPS14	PF00411.16|Ribosomal_S11|Ribosomal protein S11|m.76903:37-155
c107137_g1	426.00	55.00	55.241	4.361	-3.63	2.44e-03	6.04e-02	no	down	GLIPR1-like protein 1 [Clonorchis sinensis]	_	_	_	PF00188.23|CAP|Cysteine-rich secretory protein family|m.36799:35-168
c113736_g1	1665.00	221.00	41.214	3.267	-3.62	2.45e-03	6.05e-02	no	down	_	_	_	_	PF00811.15|Ependymin|Ependymin|m.24051:80-193
c124195_g1	11.00	316.00	0.965	16.769	3.99	2.45e-03	6.06e-02	no	up	_	_	_	_	PF00059.18|Lectin_C|Lectin C-type domain|m.10864:44-132
c126430_g1	72.00	7.00	10.997	0.655	-3.88	2.46e-03	6.06e-02	no	down	_	_	_	_	_
c91157_g1	72.00	7.00	4.814	0.284	-3.68	2.46e-03	6.06e-02	no	down	phosphate carrier protein mitochondrial [Clonorchis sinensis]	RecName: Full=Phosphate carrier protein, mitochondrial; AltName: Full=Phosphate transport protein; Short=PTP; AltName: Full=Solute carrier family 25 member 3; Flags:	SJCHGC06134 protein	SLC25A3, PHC, PIC	PF00153.24|Mito_carr|Mitochondrial carrier protein|m.26974:24-106;PF00153.24|Mito_carr|Mitochondrial carrier protein|m.26974:121-204;PF00153.24|Mito_carr|Mitochondrial carrier protein|m.26974:219-295
c91147_g1	72.00	7.00	3.947	0.230	-3.62	2.46e-03	6.06e-02	no	down	calreticulin autoantigen homolog precursor,putative [Schistosoma mansoni]	_	_	CALR	PF00262.15|Calreticulin|Calreticulin family|m.69473:21-255;PF00262.15|Calreticulin|Calreticulin family|m.69473:240-330
c100724_g1	102.00	11.00	14.308	0.945	-3.79	2.47e-03	6.08e-02	no	down	hypothetical protein T265_10037 [Opisthorchis viverrini]	_	SJCHGC04249 protein	RP-L13Ae, RPL13A	PF00572.15|Ribosomal_L13|Ribosomal protein L13|m.55639:19-128
c122880_g1	102.00	11.00	2.432	0.182	-3.17	2.47e-03	6.08e-02	no	down	hypothetical protein LOTGIDRAFT_104147 [Lottia gigantea]	_	_	TMPRSS2	PF00089.23|Trypsin|Trypsin|m.37233:315-541;PF00629.20|MAM|MAM domain, meprin/A5/mu|m.37233:554-712;PF00629.20|MAM|MAM domain, meprin/A5/mu|m.37233:723-882;PF00431.17|CUB|CUB domain|m.37233:16-121;PF00057.15|Ldl_recept_a|Low-density lipoprotein receptor domain class A|m.37233:134-169;PF00057.15|Ldl_recept_a|Low-density lipoprotein receptor domain class A|m.37233:172-206;PF09342.8|DUF1986|Domain of…
c105856_g1	31.00	1.00	17.131	0.358	-5.23	2.48e-03	6.11e-02	no	down	_	_	_	_	_
c102808_g1	2.00	93.00	0.061	1.735	3.51	2.49e-03	6.13e-02	no	up	_	_	_	_	_
c78422_g1	162.00	19.00	8.920	0.628	-3.63	2.50e-03	6.13e-02	no	down	hypothetical protein T265_07589 [Opisthorchis viverrini]	RecName: Full=Glyceraldehyde-3-phosphate dehydrogenase; Short=GAPDH; AltName: Full=Major larval surface antigen; AltName: Full=P-37 [Schistosoma mansoni]	Glyceraldehyde-3-phosphate dehydrogenase (EC 1.2.1.12)	GAPDH, gapA	PF02800.17|Gp_dh_C|Glyceraldehyde 3-phosphate dehydrogenase, C-terminal domain|m.20652:157-314;PF00044.21|Gp_dh_N|Glyceraldehyde 3-phosphate dehydrogenase, NAD binding domain|m.20652:5-152
c79393_g1	1.00	74.00	0.073	3.166	4.24	2.51e-03	6.13e-02	no	up	_	_	_	_	_
c57047_g1	0.00	35.00	0.000	2.430	4.66	2.53e-03	6.13e-02	no	up	_	_	_	_	_
c107262_g1	0.00	35.00	0.000	2.788	4.85	2.53e-03	6.13e-02	no	up	_	_	_	_	_
c111968_g1	0.00	35.00	0.000	2.417	4.65	2.53e-03	6.13e-02	no	up	_	_	_	_	_
c76241_g1	0.00	35.00	0.000	1.701	4.17	2.53e-03	6.13e-02	no	up	_	_	_	_	_
c72838_g1	0.00	35.00	0.000	1.276	3.78	2.53e-03	6.13e-02	no	up	_	_	_	_	_
c109386_g2	0.00	35.00	0.000	1.883	4.31	2.53e-03	6.13e-02	no	up	_	_	_	_	_
c102490_g2	0.00	35.00	0.000	1.782	4.23	2.53e-03	6.13e-02	no	up	hypothetical protein [Gemmata obscuriglobus]	_	_	_	_
c122896_g3	0.00	35.00	0.000	14.501	7.19	2.53e-03	6.13e-02	no	up	_	_	_	_	_
c86036_g1	0.00	35.00	0.000	1.121	3.61	2.53e-03	6.13e-02	no	up	_	_	_	_	_
c118867_g3	0.00	35.00	0.000	3.558	5.19	2.53e-03	6.13e-02	no	up	_	_	_	_	_
c84655_g3	0.00	35.00	0.000	1.296	3.80	2.53e-03	6.13e-02	no	up	_	_	_	_	_
c89026_g1	0.00	35.00	0.000	1.769	4.22	2.53e-03	6.13e-02	no	up	_	_	_	_	_
c118155_g3	0.00	35.00	0.000	1.229	3.73	2.53e-03	6.13e-02	no	up	PREDICTED: GTPase IMAP family member 4-like [Poecilia formosa]	_	_	_	PF04548.13|AIG1|AIG1 family|m.18152:1-152
c97838_g3	0.00	35.00	0.000	2.410	4.65	2.53e-03	6.13e-02	no	up	_	_	_	_	_
c177267_g1	0.00	35.00	0.000	3.261	5.07	2.53e-03	6.13e-02	no	up	_	_	_	_	_
c97794_g1	0.00	35.00	0.000	2.950	4.93	2.53e-03	6.13e-02	no	up	_	_	_	_	_
c128671_g1	0.00	35.00	0.000	1.654	4.13	2.53e-03	6.13e-02	no	up	Tudor domain-containing protein 1 [Crassostrea gigas]	_	_	_	PF00567.21|TUDOR|Tudor domain|m.21135:13-137
c48443_g1	0.00	35.00	0.000	1.532	4.03	2.53e-03	6.13e-02	no	up	_	_	_	_	_
c92910_g1	0.00	35.00	0.000	1.715	4.18	2.53e-03	6.13e-02	no	up	_	_	_	_	_
c107618_g1	0.00	35.00	0.000	1.438	3.94	2.53e-03	6.13e-02	no	up	_	_	_	_	_
c97943_g1	0.00	35.00	0.000	1.964	4.37	2.53e-03	6.13e-02	no	up	_	_	_	_	_
c90338_g1	0.00	35.00	0.000	1.114	3.60	2.53e-03	6.13e-02	no	up	_	_	_	_	_
c119205_g1	2393.00	323.00	69.977	5.644	-3.61	2.54e-03	6.15e-02	no	down	_	_	_	_	_
c120316_g1	31.00	807.00	0.745	11.618	3.79	2.54e-03	6.15e-02	no	up	_	_	_	_	_
c112249_g1	589.00	77.00	12.781	0.999	-3.55	2.55e-03	6.18e-02	no	down	eukaryotic translation elongation factor 2, gene 2 [Xenopus laevis]	RecName: Full=Elongation factor 2; Short=EF-2 [Caenorhabditis elegans]	similar to Elongation factor 2 (EF-2)	EEF2	PF00009.24|GTP_EFTU|Elongation factor Tu GTP binding domain|m.59506:18-351;PF03764.15|EFG_IV|Elongation factor G, domain IV|m.59506:616-729;PF00679.21|EFG_C|Elongation factor G C-terminus|m.59506:732-818;PF03144.22|GTP_EFTU_D2|Elongation factor Tu domain 2|m.59506:402-478;PF14492.3|EFG_II|Elongation Factor G, domain II|m.59506:495-557
c124922_g3	23.00	622.00	1.344	21.866	3.93	2.56e-03	6.19e-02	no	up	_	_	_	_	_
c98161_g1	297.00	7386.00	11.498	171.294	3.89	2.56e-03	6.19e-02	no	up	_	_	_	_	_
c94982_g1	3.00	110.00	0.415	7.635	3.91	2.57e-03	6.21e-02	no	up	PREDICTED: poly [ADP-ribose]	RecName: Full=Poly [ADP-ribose]	_	PARP10_14_15	_
c111458_g1	3.00	110.00	0.073	1.539	3.24	2.57e-03	6.21e-02	no	up	hypothetical protein LOTGIDRAFT_128629 [Lottia gigantea]	RecName: Full=Aquaporin-9; Short=AQP-9; AltName: Full=Aquaglyceroporin-9; AltName: Full=Small solute channel 1 [Homo sapiens]	_	AQP9	PF00230.17|MIP|Major intrinsic protein|m.14465:7-250
c99951_g1	81.00	9.00	4.704	0.317	-3.53	2.58e-03	6.24e-02	no	down	suppressor of tumorigenicity protein 13, partial [Clonorchis sinensis]	RecName: Full=Hsc70-interacting protein; Short=Hip; AltName: Full=Protein FAM10A1; AltName: Full=Protein ST13 homolog	SJCHGC09192 protein	ST13	PF13181.3|TPR_8|Tetratricopeptide repeat|m.20117:126-151
c118820_g1	190.00	24.00	7.490	0.884	-2.95	2.59e-03	6.24e-02	no	down	hypothetical protein LOTGIDRAFT_169342 [Lottia gigantea]	_	_	_	PF01697.24|Glyco_transf_92|Glycosyltransferase family 92|m.39219:189-418
c115094_g2	2.00	91.00	0.122	3.402	3.98	2.61e-03	6.30e-02	no	up	_	_	_	_	_
c120659_g1	2693.00	367.00	372.612	31.128	-3.58	2.63e-03	6.33e-02	no	down	RecName: Full=Kunitz-type serine protease inhibitor bitisilin-2; AltName: Full=BG-15; AltName: Full=Kunitz protease inhibitor 2; Flags: Precursor [Bitis gabonica]	RecName: Full=Kunitz-type serine protease inhibitor bitisilin-2; AltName: Full=BG-15; AltName: Full=Kunitz protease inhibitor 2; Flags: Precursor [Bitis gabonica]	_	_	_
c90033_g1	1.00	72.00	0.037	1.586	3.62	2.65e-03	6.39e-02	no	up	PREDICTED: sphingosine-1-phosphate phosphatase 1-like [Aplysia californica]	_	_	SGPP1	PF01569.18|PAP2|PAP2 superfamily|m.50976:216-320
c60248_g1	40.00	3.00	6.427	0.297	-4.04	2.65e-03	6.39e-02	no	down	hypothetical protein T265_11086 [Opisthorchis viverrini]	_	SJCHGC02867 protein	CFL	PF00241.17|Cofilin_ADF|Cofilin/tropomyosin-type actin-binding protein|m.9855:17-139
c116805_g2	7227.00	994.00	707.627	59.096	-3.58	2.66e-03	6.40e-02	no	down	_	_	_	_	_
c131355_g1	30.00	1.00	2.627	0.054	-4.15	2.68e-03	6.42e-02	no	down	plastin-2 [Clonorchis sinensis]	RecName: Full=Plastin-1 [Mus musculus]	_	PLS1	PF00307.28|CH|Calponin homology (CH) domain|m.30505:121-238
c74326_g2	30.00	2.00	2.407	0.095	-3.68	2.68e-03	6.42e-02	no	down	putative chaperonin containing t-complex protein 1,epsilon subunit, tcpe [Schistosoma mansoni]	RecName: Full=T-complex protein 1 subunit epsilon; Short=TCP-1-epsilon; AltName: Full=CCT-epsilon [Homo sapiens]	hypothetical protein	CCT5	PF00118.21|Cpn60_TCP1|TCP-1/cpn60 chaperonin family|m.31706:3-305
c148967_g1	30.00	2.00	4.399	0.182	-4.00	2.68e-03	6.42e-02	no	down	myosin-2 essential light chain, partial [Clonorchis sinensis]	_	Myosin-2 essential light chain Clone ZZZ83 mRNA sequence	MYL6	PF13405.3|EF-hand_6|EF-hand domain|m.40050:84-113;PF13833.3|EF-hand_8|EF-hand domain pair|m.40050:59-107
c76781_g1	30.00	2.00	85.263	3.571	-4.54	2.68e-03	6.42e-02	no	down	SJCHGC02562 protein [Schistosoma japonicum]	_	SJCHGC02562 protein	RP-L29e, RPL29	_
c125478_g2	30.00	2.00	1.992	0.088	-3.48	2.68e-03	6.42e-02	no	down	PREDICTED: multidrug resistance-associated protein 1-like [Aplysia californica]	RecName: Full=Canalicular multispecific organic anion transporter 2; AltName: Full=ATP-binding cassette sub-family C member 3; AltName: Full=Multi-specific organic a	_	ABCC1	_
c177156_g1	30.00	2.00	8.480	0.358	-4.23	2.68e-03	6.42e-02	no	down	hypothetical protein T265_08648 [Opisthorchis viverrini]	_	SJCHGC05994 protein	EIF1, SUI1	PF01253.19|SUI1|Translation initiation factor SUI1|m.54990:33-104
c34128_g1	30.00	2.00	1.112	0.047	-3.04	2.68e-03	6.42e-02	no	down	T-complex protein 1 subunit delta [Clonorchis sinensis]	RecName: Full=T-complex protein 1 subunit delta; Short=TCP-1-delta; AltName: Full=CCT-delta [Takifugu rubripes]	chaperonin	CCT4	PF00118.21|Cpn60_TCP1|TCP-1/cpn60 chaperonin family|m.19013:41-535
c96522_g1	5.00	164.00	0.122	2.316	3.44	2.69e-03	6.43e-02	no	up	_	_	_	_	_
c116070_g1	452.00	60.00	9.677	0.770	-3.49	2.69e-03	6.43e-02	no	down	toll-like receptor 1 [Crassostrea gigas]	RecName: Full=Toll-like receptor 12; Flags: Precursor [Mus musculus]	_	_	PF01582.17|TIR|TIR domain|m.1041:640-736;PF13676.3|TIR_2|TIR domain|m.1041:642-750
c111257_g1	8.00	235.00	4.484	4.172	-0.10	2.70e-03	6.45e-02	no	down	PREDICTED: zinc finger protein 596-like isoform 7 [Dasypus novemcinctus]	_	_	KRAB	_
c87622_g1	530.00	71.00	301.169	26.065	-3.53	2.70e-03	6.45e-02	no	down	hypothetical protein EMIHUDRAFT_121290 [Emiliania huxleyi CCMP1516]	RecName: Full=Glycine-rich RNA-binding protein 3, mitochondrial; Short=AtGR-RBP3; AltName: Full=AtRBG3; AltName: Full=Mitochondrial RNA-binding protein 2a; Short=At	_	PLCD	_
c21386_g1	70.00	7.00	7.637	0.466	-3.77	2.71e-03	6.48e-02	no	down	hypothetical protein LOTGIDRAFT_235128 [Lottia gigantea]	_	_	_	PF01421.16|Reprolysin|Reprolysin (M12B) family zinc metalloprotease|m.78788:8-161;PF13688.3|Reprolysin_5|Metallo-peptidase family M12|m.78788:22-134;PF13582.3|Reprolysin_3|Metallo-peptidase family M12B Reprolysin-like|m.78788:53-115
c118595_g2	1240.00	170.00	128.358	10.261	-3.63	2.72e-03	6.50e-02	no	down	PREDICTED: fibrinogen C domain-containing protein 1-like [Amphimedon queenslandica]	RecName: Full=Tenascin-R; Short=TN-R; AltName: Full=Janusin; AltName: Full=Restrictin; Flags: Precursor [Homo sapiens]	_	_	PF00147.15|Fibrinogen_C|Fibrinogen beta and gamma chains, C-terminal globular domain|m.71773:3-126
c118564_g1	2.00	90.00	0.196	5.502	4.24	2.73e-03	6.52e-02	no	up	_	_	_	_	_
c121234_g2	4.00	145.00	0.318	7.271	4.14	2.74e-03	6.53e-02	no	up	_	_	_	_	_
c129882_g1	517.00	70.00	4.472	0.358	-3.32	2.75e-03	6.55e-02	no	down	PREDICTED: protocadherin Fat 4 [Sorex araneus]	_	_	FAT4	PF00028.14|Cadherin|Cadherin domain|m.65138:445-534;PF00028.14|Cadherin|Cadherin domain|m.65138:968-1046
c123132_g1	5006.00	695.00	863.148	76.709	-3.49	2.75e-03	6.55e-02	no	down	_	_	_	_	_
c114845_g1	4612.00	641.00	175.450	14.602	-3.58	2.76e-03	6.57e-02	no	down	PREDICTED: galectin-3-binding protein B-like [Lepisosteus oculatus]	RecName: Full=Scavenger receptor cysteine-rich domain superfamily protein; Short=ApSRCR1; Flags: Precursor	_	NOTCH	PF00530.15|SRCR|Scavenger receptor cysteine-rich domain|m.60852:11-109;PF01607.21|CBM_14|Chitin binding Peritrophin-A domain|m.60852:132-181
c108454_g1	21042.00	2940.00	466.440	38.878	-3.58	2.77e-03	6.58e-02	no	down	PREDICTED: gelsolin-like protein 2-like isoform X1 [Aplysia californica]	_	_	_	PF00626.19|Gelsolin|Gelsolin repeat|m.13143:35-106
c129802_g2	408.00	54.00	10.667	0.844	-3.51	2.80e-03	6.58e-02	no	down	PREDICTED: protocadherin Fat 2-like [Aplysia californica]	_	_	FAT4	PF00028.14|Cadherin|Cadherin domain|m.48533:276-345
c102436_g3	1.00	71.00	0.086	3.868	4.42	2.81e-03	6.58e-02	no	up	_	_	_	_	_
c85192_g2	79.00	9.00	38.208	2.802	-3.72	2.82e-03	6.58e-02	no	down	PREDICTED: tubulin alpha-1B chain isoform X1 [Danio rerio]	RecName: Full=Tubulin alpha-1 chain	_	TUBA	PF00091.22|Tubulin|Tubulin/FtsZ family, GTPase domain|m.49053:21-126
c117213_g1	79.00	9.00	4.900	0.324	-3.56	2.82e-03	6.58e-02	no	down	_	_	_	_	_
c117657_g4	13.00	355.00	0.183	2.930	3.42	2.82e-03	6.58e-02	no	up	_	_	_	_	_
c96156_g1	1071.00	148.00	91.335	7.642	-3.56	2.83e-03	6.58e-02	no	down	_	_	_	_	_
c108029_g6	5.00	160.00	0.147	2.822	3.56	2.83e-03	6.58e-02	no	up	_	_	_	_	_
c15733_g1	0.00	34.00	0.000	1.181	3.68	2.84e-03	6.58e-02	no	up	_	_	_	_	_
c95175_g1	0.00	34.00	0.000	1.080	3.56	2.84e-03	6.58e-02	no	up	_	_	_	_	_
c100913_g1	0.00	34.00	0.000	1.782	4.23	2.84e-03	6.58e-02	no	up	_	_	_	_	_
c95694_g3	0.00	34.00	0.000	0.911	3.34	2.84e-03	6.58e-02	no	up	_	_	_	_	_
c64159_g1	0.00	34.00	0.000	1.877	4.31	2.84e-03	6.58e-02	no	up	hypothetical protein NCLIV_033690 [Neospora caninum Liverpool]	_	_	HMCN	PF00090.16|TSP_1|Thrombospondin type 1 domain|m.66442:171-223;PF00090.16|TSP_1|Thrombospondin type 1 domain|m.66442:230-253
c107535_g1	0.00	34.00	0.000	2.538	4.72	2.84e-03	6.58e-02	no	up	_	_	_	_	_
c46980_g1	0.00	34.00	0.000	76.183	9.58	2.84e-03	6.58e-02	no	up	_	_	_	_	_
c90444_g1	0.00	34.00	0.000	1.215	3.72	2.84e-03	6.58e-02	no	up	hypothetical protein LOTGIDRAFT_153779 [Lottia gigantea]	RecName: Full=Neural cell adhesion molecule L1.1; Short=N-CAM-L1.1; Short=NCAM-L1.1, partial [Danio rerio]	_	NFASC	PF00041.18|fn3|Fibronectin type III domain|m.45180:32-115
c63361_g2	0.00	34.00	0.000	1.782	4.23	2.84e-03	6.58e-02	no	up	_	_	_	_	_
c128841_g2	0.00	34.00	0.000	1.586	4.08	2.84e-03	6.58e-02	no	up	_	_	_	_	_
c112336_g2	0.00	34.00	0.000	1.208	3.71	2.84e-03	6.58e-02	no	up	_	_	_	_	_
c125165_g5	0.00	34.00	0.000	1.944	4.35	2.84e-03	6.58e-02	no	up	hypothetical protein M514_23664, partial [Trichuris suis]	_	_	_	_
c76381_g1	0.00	34.00	0.000	1.384	3.89	2.84e-03	6.58e-02	no	up	_	_	_	_	_
c85951_g1	0.00	34.00	0.000	4.921	5.65	2.84e-03	6.58e-02	no	up	_	_	_	_	_
c126434_g3	0.00	34.00	0.000	3.834	5.30	2.84e-03	6.58e-02	no	up	_	_	_	_	_
c94727_g1	0.00	34.00	0.000	1.742	4.20	2.84e-03	6.58e-02	no	up	_	_	_	_	_
c105838_g1	0.00	34.00	0.000	1.438	3.94	2.84e-03	6.58e-02	no	up	_	_	_	_	_
c67374_g2	0.00	33.00	0.000	1.701	4.17	2.84e-03	6.58e-02	no	up	_	_	_	_	_
c110883_g1	0.00	33.00	0.000	2.802	4.86	2.84e-03	6.58e-02	no	up	_	_	_	_	_
c82196_g1	0.00	33.00	0.000	0.871	3.28	2.84e-03	6.58e-02	no	up	_	_	_	_	_
c91136_g1	0.00	33.00	0.000	2.039	4.42	2.84e-03	6.58e-02	no	up	_	_	_	_	_
c103334_g1	0.00	33.00	0.000	1.397	3.90	2.84e-03	6.58e-02	no	up	_	_	_	_	_
c56388_g1	0.00	33.00	0.000	1.141	3.63	2.84e-03	6.58e-02	no	up	_	_	_	_	_
c76478_g1	0.00	33.00	0.000	1.310	3.82	2.84e-03	6.58e-02	no	up	_	_	_	_	_
c126296_g1	0.00	33.00	0.000	1.492	3.99	2.84e-03	6.58e-02	no	up	_	_	_	_	_
c78334_g1	0.00	33.00	0.000	1.870	4.30	2.84e-03	6.58e-02	no	up	_	_	_	_	_
c123538_g3	0.00	33.00	0.000	1.310	3.82	2.84e-03	6.58e-02	no	up	_	_	_	_	_
c128788_g2	0.00	33.00	0.000	2.930	4.92	2.84e-03	6.58e-02	no	up	_	_	_	_	_
c103556_g1	0.00	33.00	0.000	0.837	3.23	2.84e-03	6.58e-02	no	up	_	_	_	_	_
c123775_g2	0.00	33.00	0.000	1.121	3.61	2.84e-03	6.58e-02	no	up	_	_	_	_	_
c84554_g1	0.00	33.00	0.000	2.444	4.67	2.84e-03	6.58e-02	no	up	_	_	_	_	_
c25372_g2	0.00	33.00	0.000	1.445	3.95	2.84e-03	6.58e-02	no	up	_	_	_	_	_
c85955_g1	0.00	33.00	0.000	1.080	3.56	2.84e-03	6.58e-02	no	up	_	_	_	_	_
c81419_g1	0.00	33.00	0.000	2.498	4.70	2.84e-03	6.58e-02	no	up	_	_	_	_	_
c123035_g2	0.00	33.00	0.000	10.457	6.72	2.84e-03	6.58e-02	no	up	_	_	_	_	_
c23646_g1	0.00	33.00	0.000	0.810	3.19	2.84e-03	6.58e-02	no	up	_	_	_	_	_
c122407_g1	0.00	33.00	0.000	1.208	3.71	2.84e-03	6.58e-02	no	up	_	_	_	_	_
c91547_g1	0.00	33.00	0.000	1.843	4.28	2.84e-03	6.58e-02	no	up	_	_	_	_	_
c167180_g1	0.00	33.00	0.000	2.039	4.42	2.84e-03	6.58e-02	no	up	_	_	_	_	_
c48252_g1	0.00	33.00	0.000	1.215	3.72	2.84e-03	6.58e-02	no	up	elongation factor 1 A, partial [Macrophthalmus japonicus]	RecName: Full=Elongation factor 1-alpha, somatic form; Short=EF-1-alpha-S	similar to CG1873-PA, isoform A	EEF1A	PF03143.14|GTP_EFTU_D3|Elongation factor Tu C-terminal domain|m.5599:268-374;PF00009.24|GTP_EFTU|Elongation factor Tu GTP binding domain|m.5599:1-167;PF03144.22|GTP_EFTU_D2|Elongation factor Tu domain 2|m.5599:193-258
c111051_g1	0.00	33.00	0.000	1.816	4.26	2.84e-03	6.58e-02	no	up	_	_	_	_	_
c108048_g1	0.00	33.00	0.000	3.227	5.06	2.84e-03	6.58e-02	no	up	_	_	_	_	_
c122600_g4	636.00	87.00	16.165	1.323	-3.51	2.85e-03	6.59e-02	no	down	_	_	_	_	PF07686.14|V-set|Immunoglobulin V-set domain|m.6287:33-128
c88696_g1	4658.00	655.00	1274.799	112.988	-3.49	2.85e-03	6.60e-02	no	down	_	_	_	_	_
c57534_g1	49.00	4.00	13.343	0.689	-4.09	2.86e-03	6.61e-02	no	down	hypothetical protein T265_14231, partial [Opisthorchis viverrini]	_	Putative uncharacterized protein	RP-S30e, RPS30	PF04758.11|Ribosomal_S30|Ribosomal protein S30|m.65806:81-139
c132063_g1	49.00	4.00	4.814	0.236	-3.87	2.86e-03	6.61e-02	no	down	thioredoxin peroxidase [Fasciola thioredoxin peroxidase [Fasciola hepatica]	RecName: Full=Thioredoxin peroxidase; AltName: Full=Peroxiredoxin; AltName: Full=Thiol-specific antioxidant protein; AltName: Full=Thioredoxin-dependent peroxide redu	SJCHGC00794 protein	E1.11.1.15, PRDX, ahpC	PF00578.18|AhpC-TSA|AhpC/TSA family|m.17075:52-181;PF08534.7|Redoxin|Redoxin|m.17075:49-192;PF10417.6|1-cysPrx_C|C-terminal domain of 1-Cys peroxiredoxin|m.17075:202-236
c63432_g1	29.00	1.00	1.466	0.027	-3.62	2.89e-03	6.66e-02	no	down	putative chaperonin containing t-complex protein 1, theta subunit, tcpq [Schistosoma mansoni]	RecName: Full=T-complex protein 1 subunit theta; Short=TCP-1-theta; AltName: Full=CCT-theta	chaperonin containing TCP1, subunit 8 (theta)	CCT8	PF00118.21|Cpn60_TCP1|TCP-1/cpn60 chaperonin family|m.78160:39-418
c117083_g1	29.00	2.00	2.383	0.101	-3.63	2.89e-03	6.66e-02	no	down	_	_	_	_	_
c66055_g1	29.00	2.00	7.050	0.304	-4.15	2.89e-03	6.66e-02	no	down	_	_	_	_	_
c78755_g1	29.00	2.00	3.018	0.115	-3.86	2.89e-03	6.66e-02	no	down	_	_	_	_	_
c112829_g2	29.00	2.00	3.543	0.149	-3.87	2.89e-03	6.66e-02	no	down	_	_	_	_	_
c115264_g2	78.00	9.00	7.808	0.527	-3.66	2.90e-03	6.68e-02	no	down	_	_	_	_	_
c111807_g1	78.00	9.00	3.776	0.263	-3.42	2.90e-03	6.68e-02	no	down	hypothetical protein LOTGIDRAFT_179011 [Lottia gigantea]	RecName: Full=Adenosine kinase; Short=AK; AltName: Full=Adenosine 5'-phosphotransferase [Physcomitrella patens]	_	E2.7.1.20, ADK	PF00294.21|PfkB|pfkB family carbohydrate kinase|m.48216:49-347
c124459_g1	2856.00	403.00	100.500	8.486	-3.55	2.91e-03	6.68e-02	no	down	PREDICTED: deleted in malignant brain tumors 1 protein-like, partial [Strongylocentrotus purpuratus]	RecName: Full=Scavenger receptor cysteine-rich type 1 protein M130; AltName: CD_antigen=CD163; Contains: RecName: Full=Soluble CD163; Short=sCD163; Flags: Precurs	_	_	PF00530.15|SRCR|Scavenger receptor cysteine-rich domain|m.18372:135-201;PF00530.15|SRCR|Scavenger receptor cysteine-rich domain|m.18372:219-318;PF00530.15|SRCR|Scavenger receptor cysteine-rich domain|m.18372:334-427;PF00530.15|SRCR|Scavenger receptor cysteine-rich domain|m.18372:440-534
c119983_g2	3347.00	473.00	781.208	57.658	-3.76	2.92e-03	6.71e-02	no	down	PREDICTED: deleted in malignant brain tumors 1 protein-like [Strongylocentrotus purpuratus]	RecName: Full=Scavenger receptor cysteine-rich type 1 protein M130; AltName: CD_antigen=CD163; Contains: RecName: Full=Soluble CD163; Short=sCD163; Flags: Precurs	_	_	PF00530.15|SRCR|Scavenger receptor cysteine-rich domain|m.19599:5-47;PF00530.15|SRCR|Scavenger receptor cysteine-rich domain|m.19599:60-158;PF00530.15|SRCR|Scavenger receptor cysteine-rich domain|m.19599:171-268
c110713_g2	431.00	58.00	25.928	2.424	-3.37	2.92e-03	6.71e-02	no	down	PREDICTED: CD209 antigen-like protein 2 [Stegastes partitus]	RecName: Full=Collectin-46; Short=CL-46; AltName: Full=46 kDa collectin; Flags: Precursor [Bos taurus]	_	MRC	PF00059.18|Lectin_C|Lectin C-type domain|m.16664:49-155
c117699_g2	1231.00	173.00	72.995	6.170	-3.54	2.92e-03	6.71e-02	no	down	hypothetical protein LOTGIDRAFT_162276 [Lottia gigantea]	RecName: Full=Mannan endo-1,4-beta-mannosidase; AltName: Full=Beta-mannanase; AltName: Full=Endo-beta-1,4-mannanase; Short=Man5A; Short=ManA; Flags: Precursor [Myti	_	_	PF00150.15|Cellulase|Cellulase (glycosyl hydrolase family 5)|m.30934:54-312
c118513_g1	154.00	20.00	3.971	0.311	-3.31	2.94e-03	6.75e-02	no	down	Tripartite motif-containing protein 2 [Crassostrea gigas]	_	_	_	_
c128169_g2	21.00	543.00	0.281	5.232	3.81	2.95e-03	6.77e-02	no	up	hypothetical protein CGI_10008306 [Crassostrea gigas]	_	_	MSL1	PF13676.3|TIR_2|TIR domain|m.38074:341-439;PF01582.17|TIR|TIR domain|m.38074:347-418
c49496_g1	7.00	211.00	5.217	101.984	4.26	2.96e-03	6.79e-02	no	up	mega-hemocyanin [Melanoides tuberculata]	RecName: Full=Hemocyanin, beta-C chain unit D, partial [Helix pomatia]	_	_	PF14830.3|Haemocyan_bet_s|Haemocyanin beta-sandwich|m.34694:7-84
c112042_g1	182.00	23.00	18.059	1.532	-3.48	2.97e-03	6.80e-02	no	down	hypothetical protein BRAFLDRAFT_92077 [Branchiostoma floridae]	RecName: Full=Deleted in malignant brain tumors 1 protein; AltName: Full=Hensin; Flags: Precursor [Sus scrofa]	_	CUBN	PF00431.17|CUB|CUB domain|m.43806:60-155
c107542_g1	637.00	88.00	40.029	3.328	-3.55	2.98e-03	6.80e-02	no	down	_	_	_	_	_
c130366_g5	1.00	70.00	0.110	4.584	4.48	2.98e-03	6.80e-02	no	up	PREDICTED: poly [ADP-ribose]	_	_	PARP10_14_15	PF01661.18|Macro|Macro domain|m.41278:227-256
c124347_g7	1.00	70.00	0.024	1.175	3.36	2.98e-03	6.80e-02	no	up	_	_	_	_	_
c111234_g4	1.00	70.00	0.049	2.160	3.92	2.98e-03	6.80e-02	no	up	_	_	_	_	_
c82583_g1	39.00	3.00	4.949	0.230	-3.94	2.98e-03	6.80e-02	no	down	ferritin heavy chain [Clonorchis sinensis]	RecName: Full=Ferritin-2 heavy chain	annotation not avaliable	FTH1	PF00210.21|Ferritin|Ferritin-like domain|m.59714:29-168;PF02915.14|Rubrerythrin|Rubrerythrin|m.59714:33-123
c111556_g1	39.00	3.00	3.824	0.176	-3.83	2.98e-03	6.80e-02	no	down	_	_	_	_	_
c110425_g1	1885.00	267.00	89.136	7.574	-3.54	2.99e-03	6.82e-02	no	down	hypothetical protein LOTGIDRAFT_154423 [Lottia gigantea]	_	_	_	_
c114629_g1	314.00	42.00	13.673	1.094	-3.53	2.99e-03	6.82e-02	no	down	hypothetical protein LOTGIDRAFT_166645 [Lottia gigantea]	_	_	_	_
c111324_g1	77.00	9.00	3.299	0.230	-3.36	2.99e-03	6.82e-02	no	down	hypothetical protein T265_09134 [Opisthorchis viverrini]	RecName: Full=Annexin A7; AltName: Full=Annexin VII; AltName: Full=Annexin-7; AltName: Full=Synexin [Mus musculus]	Annexin A13 (Annexin XIII) (Annexin, intestine-specific) SJCHGC01577 protein	_	PF00191.17|Annexin|Annexin|m.21756:20-84;PF00191.17|Annexin|Annexin|m.21756:93-164;PF00191.17|Annexin|Annexin|m.21756:198-260;PF00191.17|Annexin|Annexin|m.21756:279-339
c55363_g2	2.00	88.00	0.232	6.096	4.22	3.00e-03	6.83e-02	no	up	_	_	_	_	_
c106075_g4	3.00	105.00	0.183	5.556	4.32	3.00e-03	6.83e-02	no	up	hypothetical protein LOTGIDRAFT_138191, partial [Lottia gigantea]	_	natriuretic peptide receptor A/guanylate cyclase A (atrionatriuretic peptide receptor A)	ANPRA, NPR1	PF00211.17|Guanylate_cyc|Adenylate and Guanylate cyclase catalytic domain|m.69708:64-248;PF07701.11|HNOBA|Heme NO binding associated|m.69708:26-57
c115907_g2	3.00	105.00	0.293	6.231	4.01	3.00e-03	6.83e-02	no	up	_	_	_	_	_
c112226_g1	58.00	6.00	31.537	2.160	-3.81	3.00e-03	6.83e-02	no	down	_	_	_	_	_
c86858_g1	41.00	1007.00	15.176	237.398	3.96	3.01e-03	6.84e-02	no	up	_	_	_	_	_
c129128_g3	578.00	80.00	79.764	6.764	-3.54	3.01e-03	6.84e-02	no	down	thioester-containing protein [Azumapecten farreri]	_	_	CD109	PF07678.11|A2M_comp|A-macroglobulin complement component|m.41944:41-213;PF10569.6|Thiol-ester_cl|Alpha-macro-globulin thiol-ester bond-forming region|m.41944:1-21
c106740_g1	1624.00	231.00	46.077	3.915	-3.52	3.02e-03	6.86e-02	no	down	PREDICTED: transmembrane protease serine 5-like [Aplysia californica]	_	_	PLG	PF00089.23|Trypsin|Trypsin|m.54668:107-380
c115391_g1	105.00	12.00	4.264	0.290	-3.48	3.04e-03	6.89e-02	no	down	_	_	_	_	_
c111568_g1	868.00	122.00	37.414	3.153	-3.53	3.04e-03	6.89e-02	no	down	hypothetical protein CGI_10016482 [Crassostrea gigas]	_	_	_	_
c87652_g1	96.00	11.00	4.985	0.344	-3.52	3.05e-03	6.91e-02	no	down	heterogeneous nuclear ribonucleoprotein A1/A3 [Clonorchis sinensis]	RecName: Full=Heterogeneous nuclear ribonucleoprotein A2 homolog 2; AltName: Full=hnRNP A2(B) [Xenopus laevis]	SJCHGC06206 protein	HNRNPA1_3	PF00076.19|RRM_1|RNA recognition motif. (a.k.a. RRM, RBD, or RNP domain)|m.3259:32-89;PF00076.19|RRM_1|RNA recognition motif. (a.k.a. RRM, RBD, or RNP domain)|m.3259:123-180
c104806_g1	265.00	36.00	7.478	0.608	-3.42	3.07e-03	6.95e-02	no	down	hexokinase [Clonorchis sinensis]	_	_	HK	PF03727.13|Hexokinase_2|Hexokinase|m.66464:271-503;PF00349.18|Hexokinase_1|Hexokinase|m.66464:72-264
c105271_g1	1502.00	215.00	398.797	35.860	-3.47	3.08e-03	6.97e-02	no	down	_	_	_	_	_
c118769_g1	236.00	32.00	12.756	1.040	-3.50	3.09e-03	7.00e-02	no	down	PREDICTED: balbiani ring protein 3-like [Aplysia californica]	_	_	_	PF01607.21|CBM_14|Chitin binding Peritrophin-A domain|m.40567:53-99
c119399_g4	441.00	62.00	56.622	4.874	-3.51	3.11e-03	7.03e-02	no	down	_	_	_	_	_
c119463_g1	11.00	293.00	0.147	2.363	3.32	3.11e-03	7.03e-02	no	up	_	_	_	_	_
c122168_g4	19.00	482.00	0.587	8.952	3.72	3.12e-03	7.05e-02	no	up	_	_	_	_	_
c100075_g2	1066.00	152.00	54.936	4.705	-3.52	3.12e-03	7.05e-02	no	down	_	_	_	_	_
c119641_g1	1073.00	154.00	55.192	4.759	-3.51	3.14e-03	7.07e-02	no	down	hypothetical protein LOTGIDRAFT_230366 [Lottia gigantea]	_	_	_	PF00685.24|Sulfotransfer_1|Sulfotransferase domain|m.65414:63-286;PF13469.3|Sulfotransfer_3|Sulfotransferase family|m.65414:135-226
c128565_g1	113.00	2650.00	1.955	27.314	3.74	3.14e-03	7.07e-02	no	up	_	_	_	_	_
c66034_g1	5.00	155.00	0.440	8.357	3.97	3.15e-03	7.07e-02	no	up	_	_	_	_	_
c105809_g2	2.00	86.00	0.110	2.991	3.88	3.15e-03	7.07e-02	no	up	hypothetical protein LOTGIDRAFT_173550 [Lottia gigantea]	_	_	_	_
c120671_g1	48.00	4.00	2.419	0.122	-3.50	3.15e-03	7.07e-02	no	down	_	_	_	_	_
c90696_g1	48.00	4.00	1.576	0.088	-3.16	3.15e-03	7.07e-02	no	down	fem-1-like protein C [Crassostrea gigas]	RecName: Full=Protein fem-1 homolog CG6966 [Drosophila melanogaster]	_	_	PF12796.4|Ank_2|Ankyrin repeats (3 copies)|m.13508:26-130;PF12796.4|Ank_2|Ankyrin repeats (3 copies)|m.13508:136-195;PF12796.4|Ank_2|Ankyrin repeats (3 copies)|m.13508:208-262;PF13606.3|Ank_3|Ankyrin repeat|m.13508:137-162;PF13606.3|Ank_3|Ankyrin repeat|m.13508:167-195;PF13606.3|Ank_3|Ankyrin repeat|m.13508:208-234;PF13637.3|Ank_4|Ankyrin repeats (many copies)|m.13508:103-155;PF13637.3|Ank_4|Anky…
c15351_g1	48.00	4.00	13.135	0.689	-4.07	3.15e-03	7.07e-02	no	down	putative 40s ribosomal protein S12 [Schistosoma mansoni]	_	40S ribosomal protein S12	RP-S12e, RPS12	PF01248.23|Ribosomal_L7Ae|Ribosomal protein L7Ae/L30e/S12e/Gadd45 family|m.53789:22-115
c123857_g4	1.00	69.00	0.110	2.363	3.55	3.16e-03	7.07e-02	no	up	_	_	_	_	_
c117858_g4	1.00	68.00	0.037	1.364	3.42	3.16e-03	7.07e-02	no	up	_	_	_	_	_
c120440_g1	12.00	326.00	0.269	4.361	3.60	3.17e-03	7.07e-02	no	up	_	_	_	_	_
c119035_g3	290.00	39.00	12.708	1.026	-3.51	3.17e-03	7.07e-02	no	down	hypothetical protein LOTGIDRAFT_236468 [Lottia gigantea]	_	_	_	_
c125144_g3	24.00	598.00	0.806	7.115	2.99	3.18e-03	7.07e-02	no	up	_	_	_	_	_
c97866_g1	4.00	137.00	1.393	36.940	4.63	3.18e-03	7.07e-02	no	up	_	_	_	_	_
c74237_g1	76.00	9.00	6.085	0.439	-3.52	3.18e-03	7.07e-02	no	down	RecName: Full=ADP-ribosylation ADP-ribosylation factor [Dugesia japonica]	_	C. briggsae CBR-ARF-1.2 protein; GTP-binding protein that functions as an allosteric activat [...]	ARF1	PF00025.18|Arf|ADP-ribosylation factor family|m.54640:6-176;PF09439.7|SRPRB|Signal recognition particle receptor beta subunit|m.54640:16-143;PF08477.10|Roc|Ras of Complex, Roc, domain of DAPkinase|m.54640:19-129;PF00071.19|Ras|Ras family|m.54640:20-132;PF04670.9|Gtr1_RagA|Gtr1/RagA G protein conserved region|m.54640:19-142;PF01926.20|MMR_HSR1|50S ribosome-binding GTPase|m.54640:19-123
c120785_g1	224.00	30.00	9.274	0.743	-3.48	3.20e-03	7.07e-02	no	down	_	_	_	_	_
c111239_g1	0.00	32.00	0.000	1.202	3.70	3.21e-03	7.07e-02	no	up	_	_	_	_	_
c102949_g1	0.00	32.00	0.000	1.377	3.88	3.21e-03	7.07e-02	no	up	_	_	_	_	_
c126126_g2	0.00	32.00	0.000	1.661	4.14	3.21e-03	7.07e-02	no	up	_	_	_	_	_
c132818_g1	0.00	32.00	0.000	3.132	5.01	3.21e-03	7.07e-02	no	up	photosystem II3 [Zea mays]	RecName: Full=Photosystem II 10 kDa polypeptide, chloroplastic; Short=PII10; Flags: Precursor	hypothetical protein	psbR	PF04725.9|PsbR|Photosystem II 10 kDa polypeptide PsbR|m.49575:34-127
c61374_g2	0.00	32.00	0.000	1.235	3.74	3.21e-03	7.07e-02	no	up	_	_	_	_	_
c65476_g1	0.00	32.00	0.000	1.634	4.12	3.21e-03	7.07e-02	no	up	_	_	_	_	_
c122840_g2	0.00	32.00	0.000	1.667	4.14	3.21e-03	7.07e-02	no	up	_	_	_	_	_
c84751_g1	0.00	32.00	0.000	1.613	4.10	3.21e-03	7.07e-02	no	up	_	_	_	_	_
c113045_g2	0.00	32.00	0.000	2.106	4.46	3.21e-03	7.07e-02	no	up	_	_	_	_	_
c51748_g1	0.00	32.00	0.000	1.060	3.54	3.21e-03	7.07e-02	no	up	_	_	_	_	PF04970.10|LRAT|Lecithin retinol acyltransferase|m.19398:9-75
c101141_g2	0.00	32.00	0.000	5.772	5.88	3.21e-03	7.07e-02	no	up	_	_	_	_	_
c100135_g1	0.00	32.00	0.000	2.646	4.78	3.21e-03	7.07e-02	no	up	_	_	_	_	_
c93034_g1	0.00	32.00	0.000	1.283	3.79	3.21e-03	7.07e-02	no	up	_	_	_	_	_
c78350_g2	0.00	32.00	0.000	0.864	3.27	3.21e-03	7.07e-02	no	up	_	_	_	_	_
c108150_g5	0.00	32.00	0.000	2.106	4.46	3.21e-03	7.07e-02	no	up	_	_	_	_	_
c48590_g1	0.00	32.00	0.000	1.499	4.00	3.21e-03	7.07e-02	no	up	_	_	_	_	_
c5632_g1	0.00	32.00	0.000	1.343	3.85	3.21e-03	7.07e-02	no	up	_	_	_	_	_
c95676_g2	0.00	32.00	0.000	2.424	4.66	3.21e-03	7.07e-02	no	up	_	_	_	_	_
c128937_g3	0.00	32.00	0.000	2.862	4.89	3.21e-03	7.07e-02	no	up	_	_	_	_	_
c101979_g1	0.00	32.00	0.000	1.512	4.01	3.21e-03	7.07e-02	no	up	_	_	_	_	_
c96554_g1	0.00	32.00	0.000	0.776	3.13	3.21e-03	7.07e-02	no	up	_	_	_	_	_
c122673_g3	0.00	32.00	0.000	35.010	8.46	3.21e-03	7.07e-02	no	up	_	_	_	_	_
c60730_g1	0.00	32.00	0.000	1.289	3.80	3.21e-03	7.07e-02	no	up	hypothetical protein CAPTEDRAFT_93822 [Capitella teleta]	_	_	_	_
c125874_g4	0.00	32.00	0.000	1.667	4.14	3.21e-03	7.07e-02	no	up	_	_	_	_	_
c37951_g2	0.00	32.00	0.000	1.802	4.25	3.21e-03	7.07e-02	no	up	_	_	_	_	_
c94441_g2	0.00	32.00	0.000	2.565	4.74	3.21e-03	7.07e-02	no	up	_	_	_	_	_
c80641_g1	0.00	32.00	0.000	1.316	3.82	3.21e-03	7.07e-02	no	up	_	_	_	_	_
c129402_g5	0.00	32.00	0.000	1.586	4.08	3.21e-03	7.07e-02	no	up	_	_	_	_	_
c132760_g1	0.00	32.00	0.000	1.809	4.25	3.21e-03	7.07e-02	no	up	_	_	_	_	_
c72440_g1	0.00	32.00	0.000	1.073	3.55	3.21e-03	7.07e-02	no	up	_	_	_	_	_
c105021_g2	4833.00	706.00	474.114	42.057	-3.49	3.22e-03	7.10e-02	no	down	g-type lysozyme [Argopecten irradians]	RecName: Full=Glycine, glutamate and proline-rich protein; Flags: Precursor	_	_	_
c113353_g3	1480.00	214.00	202.465	31.776	-2.67	3.22e-03	7.10e-02	no	down	PREDICTED: LOW QUALITY PROTEIN: keratin-associated protein 4-3-like [Cynoglossus semilaevis]	RecName: Full=Spore coat protein SP65; Short=Spore coat protein E; Flags: Precursor [Dictyostelium discoideum]	_	_	_
c128753_g2	10.00	273.00	0.489	6.872	3.57	3.23e-03	7.10e-02	no	up	_	_	_	_	_
c102364_g1	43.00	1034.00	6.036	88.941	3.86	3.24e-03	7.13e-02	no	up	_	_	_	_	_
c113811_g2	3.00	102.00	0.611	6.305	3.17	3.26e-03	7.16e-02	no	up	_	_	_	_	_
c126565_g2	1327.00	193.00	35.288	3.065	-3.48	3.26e-03	7.17e-02	no	down	_	_	_	_	_
c105531_g1	6294.00	924.00	550.444	48.943	-3.49	3.27e-03	7.17e-02	no	down	_	_	_	_	_
c109297_g2	14.00	356.00	0.501	7.676	3.69	3.29e-03	7.22e-02	no	up	hypothetical protein, partial [Burkholderia sordidicola]	RecName: Full=Holotricin-3; Flags: Precursor	_	_	_
c112943_g3	259.00	35.00	33.846	2.815	-3.54	3.29e-03	7.22e-02	no	down	_	_	_	_	_
c112447_g1	5332.00	784.00	165.711	14.501	-3.51	3.30e-03	7.22e-02	no	down	PREDICTED: X-linked retinitis pigmentosa GTPase regulator [Geospiza fortis]	_	_	NEFL, NF-L	_
c88453_g1	2.00	85.00	0.061	1.580	3.38	3.31e-03	7.23e-02	no	up	hypothetical protein CGI_10020951 [Crassostrea gigas]	RecName: Full=Zinc finger protein 227	_	KRAB	_
c71678_g1	2.00	85.00	0.037	1.566	3.60	3.31e-03	7.23e-02	no	up	PREDICTED: cGMP-gated cation channel alpha-1-like [Saccoglossus kowalevskii]	_	annotation not available	CNGA3	PF00027.26|cNMP_binding|Cyclic nucleotide-binding domain|m.37901:411-501;PF00520.28|Ion_trans|Ion transport protein|m.37901:67-314
c126238_g2	47.00	4.00	4.044	0.209	-3.75	3.31e-03	7.23e-02	no	down	_	_	_	_	_
c120035_g2	47.00	5.00	4.778	0.297	-3.62	3.31e-03	7.23e-02	no	down	_	_	_	_	_
c109086_g1	47.00	5.00	1.686	0.088	-3.25	3.31e-03	7.23e-02	no	down	PREDICTED: sterile alpha motif domain-containing protein 9-like isoform X1 [Aplysia californica]	_	_	_	_
c124949_g1	5.00	153.00	0.281	5.461	3.87	3.33e-03	7.27e-02	no	up	_	_	_	_	_
c119215_g1	4038.00	597.00	95.502	8.560	-3.46	3.34e-03	7.30e-02	no	down	hypothetical protein CAPTEDRAFT_165852 [Capitella teleta]	_	_	_	PF00884.20|Sulfatase|Sulfatase|m.52164:23-333
c90016_g2	239.00	33.00	9.543	0.790	-3.44	3.36e-03	7.33e-02	no	down	phosphoenolpyruvate carboxykinase (GTP) [Clonorchis sinensis]	_	phosphoenolpyruvate carboxykinase 1 (soluble)	E4.1.1.32, pckA, PEPCK	PF00821.15|PEPCK|Phosphoenolpyruvate carboxykinase|m.70416:30-523
c114707_g1	1.00	67.00	0.024	1.283	3.48	3.36e-03	7.33e-02	no	up	_	_	_	_	_
c115987_g1	1.00	67.00	0.037	1.323	3.38	3.36e-03	7.33e-02	no	up	hypothetical protein C923_03645 [Plasmodium falciparum UGT5.1]	_	_	_	_
c109107_g1	6.00	169.00	0.782	13.515	3.95	3.37e-03	7.33e-02	no	up	_	_	_	_	_
c104937_g1	74.00	9.00	7.698	0.533	-3.62	3.38e-03	7.36e-02	no	down	_	_	_	_	PF15633.3|Tox-ART-HYD1|HYD1 signature containing ADP-ribosyltransferase|m.39629:34-90
c115344_g3	28.00	1.00	1.564	0.034	-3.63	3.40e-03	7.37e-02	no	down	_	_	_	_	_
c60100_g2	28.00	1.00	0.953	0.020	-3.13	3.40e-03	7.37e-02	no	down	procollagen-lysine, 2-oxoglutarate 5-dioxygenase 3 [Schistosoma japonicum]	RecName: Full=Procollagen-lysine,2-oxoglutarate 5-dioxygenase 3; AltName: Full=Lysyl hydroxylase 3; Short=LH3; Flags: Precursor [Mus musculus]	_	PLOD3	_
c104760_g1	28.00	1.00	4.069	0.088	-4.47	3.40e-03	7.37e-02	no	down	_	_	_	_	_
c111256_g2	28.00	1.00	2.554	0.054	-4.11	3.40e-03	7.37e-02	no	down	_	_	_	_	_
c108160_g1	28.00	2.00	8.309	0.378	-4.14	3.40e-03	7.37e-02	no	down	_	_	_	_	PF05184.12|SapB_1|Saposin-like type B, region 1|m.2080:51-83
c110834_g1	28.00	2.00	2.884	0.128	-3.71	3.40e-03	7.37e-02	no	down	_	_	_	_	_
c130589_g1	13.00	335.00	0.305	4.726	3.57	3.40e-03	7.37e-02	no	up	_	_	_	_	_
c112085_g6	129.00	17.00	5.120	0.405	-3.37	3.40e-03	7.37e-02	no	down	PREDICTED: GTPase IMAP family member 7-like [Maylandia zebra]	RecName: Full=GTPase IMAP family member 4; AltName: Full=Immunity-associated nucleotide 1 protein; Short=IAN-1; AltName: Full=Immunity-associated protein 4 [Mus mu	_	_	PF04548.13|AIG1|AIG1 family|m.61589:20-232;PF01926.20|MMR_HSR1|50S ribosome-binding GTPase|m.61589:22-143;PF04670.9|Gtr1_RagA|Gtr1/RagA G protein conserved region|m.61589:22-174
c118343_g2	49.00	1148.00	2.859	15.311	2.38	3.44e-03	7.45e-02	no	up	PREDICTED: HRAS-like suppressor 3-like isoform X1 [Aplysia californica]	_	_	KLHL24_35	PF04970.10|LRAT|Lecithin retinol acyltransferase|m.52118:13-133
c119812_g1	11.00	284.00	1.674	17.052	3.27	3.45e-03	7.47e-02	no	up	_	_	_	_	_
c103979_g1	92.00	11.00	8.614	0.628	-3.58	3.45e-03	7.47e-02	no	down	hypothetical protein T265_01163 [Opisthorchis viverrini]	RecName: Full=40S ribosomal protein S3a	40S ribosomal protein S3a	RP-S3Ae, RPS3A	PF01015.15|Ribosomal_S3Ae|Ribosomal S3Ae family|m.23923:1-185
c126519_g2	1980.00	294.00	142.105	17.768	-2.99	3.46e-03	7.48e-02	no	down	_	_	_	_	PF00822.17|PMP22_Claudin|PMP-22/EMP/MP20/Claudin family|m.14194:62-179
c123308_g2	70.00	1608.00	1.234	17.113	3.69	3.47e-03	7.48e-02	no	up	hypothetical protein LOTGIDRAFT_170488 [Lottia gigantea]	RecName: Full=Cytochrome P450 3A13; AltName: Full=CYPIIIA13 [Mus musculus]	_	CYP3A	PF00067.19|p450|Cytochrome P450|m.44844:32-494
c106454_g1	101.00	13.00	19.025	1.519	-3.56	3.47e-03	7.48e-02	no	down	_	_	_	_	_
c111269_g4	2.00	84.00	0.171	4.212	3.99	3.48e-03	7.48e-02	no	up	_	_	_	_	_
c114371_g1	2.00	84.00	0.086	2.275	3.67	3.48e-03	7.48e-02	no	up	_	_	_	_	_
c57040_g1	2.00	84.00	0.061	1.397	3.22	3.48e-03	7.48e-02	no	up	_	_	_	_	_
c100057_g1	2.00	83.00	0.305	3.963	3.33	3.48e-03	7.48e-02	no	up	_	_	_	_	_
c115868_g1	2.00	83.00	0.049	1.566	3.48	3.48e-03	7.48e-02	no	up	_	_	_	_	_
c121468_g1	2.00	83.00	0.049	1.296	3.23	3.48e-03	7.48e-02	no	up	_	_	_	_	_
c90582_g1	46.00	4.00	2.505	0.128	-3.51	3.48e-03	7.48e-02	no	down	hypothetical protein T265_03493 [Opisthorchis viverrini]	RecName: Full=Receptor expression-enhancing protein 5	SJCHGC01246 protein	REEP5_6	PF03134.16|TB2_DP1_HVA22|TB2/DP1, HVA22 family|m.29979:67-144
c123945_g1	46.00	4.00	3.433	0.203	-3.54	3.48e-03	7.48e-02	no	down	_	_	_	_	_
c152457_g1	46.00	4.00	2.285	0.122	-3.43	3.48e-03	7.48e-02	no	down	SJCHGC01355 protein [Schistosoma japonicum]	RecName: Full=Probable pyruvate dehydrogenase E1 component subunit alpha, mitochondrial; Short=PDHE1-A; Flags: Precursor [Caenorhabditis elegans]	SJCHGC01355 protein	PDHA, pdhA	PF00676.17|E1_dh|Dehydrogenase E1 component|m.31899:68-361
c111883_g1	23.00	564.00	0.281	4.057	3.45	3.49e-03	7.49e-02	no	up	_	_	_	_	_
c109275_g1	966.00	143.00	82.795	7.419	-3.46	3.49e-03	7.49e-02	no	down	_	_	_	_	_
c115661_g1	4.00	134.00	0.061	1.269	3.09	3.49e-03	7.49e-02	no	up	_	_	_	_	_
c119389_g1	560.00	82.00	42.802	3.787	-3.46	3.50e-03	7.51e-02	no	down	hypothetical protein LOTGIDRAFT_179893 [Lottia gigantea]	RecName: Full=Caveolin-3; AltName: Full=M-caveolin [Mus musculus]	_	CAV3	PF01146.14|Caveolin|Caveolin|m.30064:2-129
c117038_g1	8.00	216.00	0.513	6.278	3.38	3.51e-03	7.53e-02	no	up	_	_	_	_	_
c121530_g2	415.00	60.00	17.253	1.492	-3.45	3.52e-03	7.54e-02	no	down	hypothetical protein LOTGIDRAFT_160396 [Lottia gigantea]	RecName: Full=Cysteine-rich venom protein kaouthin-2; AltName: Full=Cysteine-rich venom protein 23; Short=CRVP-23k; Flags: Precursor	_	_	PF00188.23|CAP|Cysteine-rich secretory protein family|m.1119:69-192
c126178_g4	5.00	150.00	0.208	3.861	3.68	3.52e-03	7.54e-02	no	up	_	_	_	_	_
c110133_g1	397.00	57.00	36.253	2.768	-3.66	3.53e-03	7.56e-02	no	down	_	_	_	_	_
c114050_g1	181.00	25.00	4.423	0.365	-3.28	3.53e-03	7.56e-02	no	down	PREDICTED: nuclear hormone receptor HR96-like [Aplysia californica]	RecName: Full=Nuclear hormone receptor family member nhr-48 [Caenorhabditis elegans]	_	NR1IN	PF00105.15|zf-C4|Zinc finger, C4 type (two domains)|m.59786:45-113;PF00104.27|Hormone_recep|Ligand-binding domain of nuclear hormone receptor|m.59786:258-424
c117005_g2	3.00	100.00	0.159	3.234	3.69	3.54e-03	7.57e-02	no	up	_	_	_	_	_
c125344_g1	145.00	19.00	4.191	0.297	-3.43	3.55e-03	7.58e-02	no	down	hypothetical protein CGI_10006272 [Crassostrea gigas]	_	_	_	_
c118374_g2	1938.00	290.00	43.658	3.895	-3.45	3.55e-03	7.58e-02	no	down	PREDICTED: iduronate 2-sulfatase isoform X1 [Mesocricetus auratus]	RecName: Full=Iduronate 2-sulfatase; AltName: Full=Alpha-L-iduronate sulfate sulfatase; Short=Idursulfase; Contains: RecName: Full=Iduronate 2-sulfatase 42 kDa chain;	_	IDS	PF00884.20|Sulfatase|Sulfatase|m.77037:26-410
c128406_g1	1291.00	193.00	16.239	1.445	-3.40	3.56e-03	7.61e-02	no	down	hypothetical protein CGI_10015501 [Crassostrea gigas]	_	_	CD109	PF07678.11|A2M_comp|A-macroglobulin complement component|m.67165:828-1084;PF07703.11|A2M_N_2|Alpha-2-macroglobulin family N-terminal region|m.67165:296-433;PF00207.19|A2M|Alpha-2-macroglobulin family|m.67165:555-645;PF10569.6|Thiol-ester_cl|Alpha-macro-globulin thiol-ester bond-forming region|m.67165:779-808;PF07677.11|A2M_recep|A-macroglobulin receptor|m.67165:1202-1280
c92054_g1	64.00	7.00	16.728	1.148	-3.75	3.58e-03	7.64e-02	no	down	hypothetical protein T265_07959 [Opisthorchis viverrini]	RecName: Full=60S ribosomal protein L32; AltName: Full=Ribosomal protein 49 RL32_DROAI RecName: Full=60S ribosomal protein L32; AltName: Ful	SJCHGC04757 protein	PARG	PF01655.15|Ribosomal_L32e|Ribosomal protein L32|m.71259:17-123
c101162_g1	27611.00	4191.00	1732.991	158.407	-3.45	3.60e-03	7.65e-02	no	down	_	_	_	_	_
c118941_g3	5.00	149.00	0.196	3.524	3.61	3.62e-03	7.65e-02	no	up	_	_	_	_	_
c117703_g1	5.00	148.00	0.159	2.910	3.54	3.62e-03	7.65e-02	no	up	_	_	_	_	_
c116509_g5	5.00	148.00	0.965	8.114	2.95	3.62e-03	7.65e-02	no	up	PREDICTED: craniofacial development protein 2-like [Aplysia californica]	_	_	_	_
c117187_g1	6.00	165.00	0.281	4.732	3.66	3.63e-03	7.65e-02	no	up	_	_	_	_	_
c103772_g1	19.00	459.00	0.733	10.572	3.68	3.64e-03	7.65e-02	no	up	_	_	_	_	_
c63404_g1	0.00	31.00	0.000	1.316	3.82	3.64e-03	7.65e-02	no	up	_	_	_	_	_
c70632_g1	0.00	31.00	0.000	1.431	3.94	3.64e-03	7.65e-02	no	up	_	_	_	_	_
c80858_g1	0.00	31.00	0.000	1.445	3.95	3.64e-03	7.65e-02	no	up	_	_	_	_	_
c38699_g1	0.00	31.00	0.000	2.741	4.83	3.64e-03	7.65e-02	no	up	anti-lipopolysaccharide factor [Eriocheir sinensis]	_	_	_	PF11630.5|DUF3254|Protein of unknown function (DUF3254)|m.9841:29-125
c129033_g3	0.00	31.00	0.000	1.836	4.28	3.64e-03	7.65e-02	no	up	_	_	_	_	_
c117522_g6	0.00	31.00	0.000	7.183	6.19	3.64e-03	7.65e-02	no	up	PREDICTED: poly [ADP-ribose]	_	_	_	_
c95207_g1	0.00	31.00	0.000	1.465	3.97	3.64e-03	7.65e-02	no	up	_	_	_	_	_
c106092_g1	0.00	31.00	0.000	3.949	5.34	3.64e-03	7.65e-02	no	up	hypothetical protein LOTGIDRAFT_236952 [Lottia gigantea]	_	_	_	_
c82276_g2	0.00	31.00	0.000	1.796	4.24	3.64e-03	7.65e-02	no	up	_	_	_	_	_
c89750_g1	0.00	31.00	0.000	1.681	4.15	3.64e-03	7.65e-02	no	up	_	_	_	_	_
c106290_g1	0.00	31.00	0.000	1.046	3.52	3.64e-03	7.65e-02	no	up	_	_	_	_	_
c88642_g2	0.00	31.00	0.000	0.898	3.32	3.64e-03	7.65e-02	no	up	_	_	_	_	_
c126877_g5	0.00	31.00	0.000	1.364	3.87	3.64e-03	7.65e-02	no	up	_	_	_	_	_
c101710_g1	0.00	31.00	0.000	1.330	3.84	3.64e-03	7.65e-02	no	up	_	_	_	_	_
c96836_g1	0.00	31.00	0.000	1.296	3.80	3.64e-03	7.65e-02	no	up	_	_	_	_	_
c98474_g1	0.00	31.00	0.000	1.013	3.48	3.64e-03	7.65e-02	no	up	_	_	_	_	_
c49546_g1	0.00	31.00	0.000	1.181	3.68	3.64e-03	7.65e-02	no	up	_	_	_	_	_
c21217_g1	0.00	31.00	0.000	1.809	4.25	3.64e-03	7.65e-02	no	up	_	_	_	_	_
c105390_g2	0.00	31.00	0.000	1.323	3.83	3.64e-03	7.65e-02	no	up	hypothetical protein LOTGIDRAFT_231664 [Lottia gigantea]	RecName: Full=Meiotic recombination protein REC8 homolog; AltName: Full=Cohesin Rec8p [Homo sapiens]	_	REC8L	PF04825.10|Rad21_Rec8_N|N terminus of Rad21 / Rec8 like protein|m.34393:34-76
c92808_g1	0.00	31.00	0.000	1.910	4.33	3.64e-03	7.65e-02	no	up	_	_	_	_	_
c97381_g1	0.00	31.00	0.000	0.999	3.46	3.64e-03	7.65e-02	no	up	_	_	_	_	_
c120041_g2	0.00	31.00	0.000	1.823	4.27	3.64e-03	7.65e-02	no	up	_	_	_	_	_
c123637_g2	0.00	31.00	0.000	146.094	10.51	3.64e-03	7.65e-02	no	up	PREDICTED: cytochrome P450 3A8-like isoform X1 [Aplysia californica]	_	_	_	_
c87359_g2	0.00	31.00	0.000	1.080	3.56	3.64e-03	7.65e-02	no	up	_	_	_	_	_
c97579_g1	0.00	31.00	0.000	1.836	4.28	3.64e-03	7.65e-02	no	up	cytochrome b6-f complex iron-sulfur subunit [Zea mays]	_	hypothetical protein	petC	PF08802.7|CytB6-F_Fe-S|Cytochrome B6-F complex Fe-S subunit|m.70824:54-92;PF00355.23|Rieske|Rieske [2Fe-2S] domain|m.70824:132-194
c186277_g1	0.00	31.00	0.000	1.181	3.68	3.64e-03	7.65e-02	no	up	elongation factor 1-alpha, putative [Toxoplasma gondii ME49]	RecName: Full=Elongation factor 1-alpha; Short=EF-1-alpha	elongation factor 1-alpha (EF-1-ALPHA); This protein promotes the GTP-dependent binding of a [...]	EEF1A	PF03143.14|GTP_EFTU_D3|Elongation factor Tu C-terminal domain|m.60911:249-356;PF00009.24|GTP_EFTU|Elongation factor Tu GTP binding domain|m.60911:1-149;PF03144.22|GTP_EFTU_D2|Elongation factor Tu domain 2|m.60911:175-240
c115618_g5	0.00	31.00	0.000	1.553	4.05	3.64e-03	7.65e-02	no	up	_	_	_	_	_
c115888_g1	2.00	82.00	0.073	1.836	3.48	3.65e-03	7.67e-02	no	up	Tenascin-X [Crassostrea gigas]	_	_	_	_
c117309_g4	144.00	19.00	21.652	0.884	-4.47	3.66e-03	7.68e-02	no	down	_	_	_	_	_
c109324_g1	3.00	99.00	0.110	2.126	3.41	3.69e-03	7.69e-02	no	up	_	_	_	_	_
c94805_g2	3.00	99.00	0.257	5.043	3.85	3.69e-03	7.69e-02	no	up	_	_	_	_	_
c117976_g1	3.00	99.00	0.464	9.357	4.07	3.69e-03	7.69e-02	no	up	_	_	_	_	_
c124363_g2	3.00	99.00	0.171	3.801	3.85	3.69e-03	7.69e-02	no	up	_	_	_	_	_
c107327_g3	3.00	98.00	0.122	2.376	3.48	3.69e-03	7.69e-02	no	up	_	_	_	_	_
c107775_g10	54.00	6.00	6.561	0.446	-3.61	3.69e-03	7.69e-02	no	down	_	_	_	_	_
c112274_g1	27.00	1.00	3.751	0.088	-4.36	3.69e-03	7.69e-02	no	down	_	_	_	_	_
c117726_g2	27.00	1.00	2.199	0.047	-3.97	3.69e-03	7.69e-02	no	down	_	_	_	_	_
c12390_g1	27.00	1.00	1.576	0.034	-3.64	3.69e-03	7.69e-02	no	down	AQP-1 [Fasciola gigantica]	_	_	_	PF00230.17|MIP|Major intrinsic protein|m.57642:33-250
c55337_g1	27.00	1.00	2.151	0.047	-3.94	3.69e-03	7.69e-02	no	down	hypothetical protein T265_05921 [Opisthorchis viverrini]	_	_	COL5AS	PF01410.15|COLFI|Fibrillar collagen C-terminal domain|m.67574:75-272;PF01391.15|Collagen|Collagen triple helix repeat (20 copies)|m.67574:1-59
c100216_g1	27.00	2.00	20.112	0.965	-4.25	3.69e-03	7.69e-02	no	down	_	_	_	_	_
c115700_g4	27.00	2.00	3.934	0.088	-4.42	3.69e-03	7.69e-02	no	down	hypothetical protein LOTGIDRAFT_105681 [Lottia gigantea]	RecName: Full=Putative protein PHLOEM PROTEIN 2-LIKE A3; Short=AtPP2-A3 [Arabidopsis thaliana]	_	_	PF04548.13|AIG1|AIG1 family|m.8307:11-218;PF01926.20|MMR_HSR1|50S ribosome-binding GTPase|m.8307:11-117
c118747_g1	63.00	7.00	5.291	0.358	-3.56	3.71e-03	7.72e-02	no	down	_	_	_	_	_
c113353_g1	735.00	110.00	189.978	25.356	-2.90	3.71e-03	7.73e-02	no	down	hypothetical protein PTSG_05399 [Salpingoeca rosetta]	RecName: Full=Integumentary mucin C.1; AltName: Full=FIM-C.1	_	_	_
c104819_g2	5714.00	874.00	670.164	62.532	-3.42	3.72e-03	7.74e-02	no	down	_	_	_	_	PF00386.18|C1q|C1q domain|m.35555:94-185
c112534_g1	90.00	11.00	2.175	0.162	-3.12	3.72e-03	7.74e-02	no	down	PREDICTED: kelch-like protein 28-like [Oryzias latipes]	_	_	KLHL28	PF07707.12|BACK|BTB And C-terminal Kelch|m.53364:131-229;PF01344.22|Kelch_1|Kelch motif|m.53364:422-457;PF00651.28|BTB|BTB/POZ domain|m.53364:21-123;PF00917.23|MATH|MATH domain|m.53364:617-730
c101050_g1	90.00	11.00	2.688	0.196	-3.24	3.72e-03	7.74e-02	no	down	hypothetical protein PFBG_05464 [Plasmodium falciparum 7G8]	RecName: Full=Phosphopantothenoylcysteine decarboxylase subunit VHS3; AltName: Full=Viable in a HAL3 SIT4 background protein 3 [Saccharomyces cerevisiae S288c]	_	_	PF00076.19|RRM_1|RNA recognition motif. (a.k.a. RRM, RBD, or RNP domain)|m.29922:560-619
c112986_g1	90.00	11.00	9.201	0.682	-3.57	3.72e-03	7.74e-02	no	down	_	_	_	_	_
c117623_g2	6.00	163.00	0.281	4.530	3.60	3.72e-03	7.74e-02	no	up	PREDICTED: uncharacterized protein LOC101863520 [Aplysia californica]	_	_	_	PF13383.3|Methyltransf_22|Methyltransferase domain|m.1559:62-273;PF05050.9|Methyltransf_21|Methyltransferase FkbM domain|m.1559:120-244
c112144_g1	46.00	1050.00	1.026	14.136	3.66	3.77e-03	7.82e-02	no	up	_	_	_	_	_
c113752_g1	274.00	39.00	11.376	0.972	-3.42	3.77e-03	7.82e-02	no	down	alginate lyase 2 [Haliotis discus discus]	_	_	_	_
c127200_g1	133.00	18.00	5.230	0.425	-3.34	3.79e-03	7.85e-02	no	down	_	_	_	_	PF00059.18|Lectin_C|Lectin C-type domain|m.62791:44-146
c124701_g1	249.00	5473.00	8.712	118.159	3.75	3.80e-03	7.87e-02	no	up	secretory eggshell protein precursor [Clonorchis sinensis]	_	_	_	_
c91336_g1	1.00	65.00	0.024	1.600	3.78	3.81e-03	7.88e-02	no	up	_	_	_	_	_
c105610_g1	1.00	64.00	0.073	2.626	3.98	3.81e-03	7.88e-02	no	up	_	_	_	_	_
c96998_g2	1.00	64.00	0.049	1.991	3.81	3.81e-03	7.88e-02	no	up	_	_	_	_	_
c124363_g1	1.00	64.00	0.110	4.185	4.35	3.81e-03	7.88e-02	no	up	_	_	_	_	_
c122976_g2	98.00	12.00	4.264	0.581	-2.68	3.81e-03	7.88e-02	no	down	_	_	_	_	_
c94224_g1	89.00	11.00	12.255	0.216	-5.29	3.82e-03	7.90e-02	no	down	hypothetical protein T265_12000 [Opisthorchis viverrini]	RecName: Full=Propionyl-CoA carboxylase beta chain, mitochondrial; Short=PCCase subunit beta; AltName: Full=Propanoyl-CoA:carbon dioxide ligase subunit beta; Flags: Pr	LOC613054 protein (Fragment)	PCCB, pccB	PF01039.19|Carboxyl_trans|Carboxyl transferase domain|m.15447:55-533
c110006_g3	71.00	9.00	5.682	0.432	-3.44	3.84e-03	7.93e-02	no	down	PREDICTED: uncharacterized protein LOC101734517 [Xenopus (Silurana) tropicalis]	_	_	_	_
c73222_g1	45.00	5.00	2.615	0.176	-3.30	3.84e-03	7.94e-02	no	down	unnamed protein product [Schistosoma 1410313A HG phosphoribosyltransferase	RecName: Full=Hypoxanthine-guanine phosphoribosyltransferase; Short=HGPRT; Short=HGPRTase [Schistosoma mansoni]	Hypoxanthine-guanine phosphoribosyltranferase SJCHGC02257 protein	hprT, hpt, HPRT1	PF00156.24|Pribosyltran|Phosphoribosyl transferase domain|m.4522:45-202
c124046_g3	124.00	16.00	16.288	1.283	-3.57	3.86e-03	7.97e-02	no	down	_	_	_	_	_
c103354_g1	220.00	31.00	9.909	0.844	-3.41	3.87e-03	7.98e-02	no	down	trypsin [Daphnia pulex]	RecName: Full=Plasma kallikrein; AltName: Full=Fletcher factor; AltName: Full=Kininogenin; AltName: Full=Plasma prekallikrein; Contains: RecName: Full=Plasma kall	_	PRSS	PF00089.23|Trypsin|Trypsin|m.24103:126-351
c118401_g1	1465.00	225.00	62.462	5.752	-3.42	3.88e-03	8.00e-02	no	down	PREDICTED: transmembrane protease serine 5-like [Aplysia californica]	_	_	_	PF00089.23|Trypsin|Trypsin|m.61231:99-354
c119940_g1	1003.00	153.00	359.953	83.568	-2.11	3.89e-03	8.01e-02	no	down	PREDICTED: mucin-2-like [Oreochromis niloticus]	_	_	_	PF00090.16|TSP_1|Thrombospondin type 1 domain|m.49290:414-458
c106951_g2	7.00	193.00	0.880	14.811	3.93	3.89e-03	8.01e-02	no	up	_	_	_	_	_
c129406_g1	3626.00	562.00	66.495	6.136	-3.42	3.91e-03	8.04e-02	no	down	_	_	_	_	_
c126515_g2	8.00	208.00	0.159	2.444	3.30	3.95e-03	8.14e-02	no	up	unnamed protein product [Tetraodon nigroviridis]	RecName: Full=N-(5-amino-5-carboxypentanoyl)-L-cysteinyl-D-valine synthase; AltName: Full=Delta-(L-alpha-aminoadipyl)-L-cysteinyl-D-valine synthetase; Short=ACV synth	_	FASN	PF00975.17|Thioesterase|Thioesterase domain|m.32188:44-336
c105205_g1	122.00	17.00	9.237	0.776	-3.41	4.01e-03	8.19e-02	no	down	ribosomal protein L19 [Xenopus Rpl19-prov protein [Xenopus laevis]	_	ribosomal protein L19	RP-L19e, RPL19	PF01280.17|Ribosomal_L19e|Ribosomal protein L19e|m.53236:3-146
[truncated: 72,514 more rows]
